# Supplementary material
Source: publisher figshare collection journal article supplement (https://springernature.figshare.com/ndownloader/files/13564313)
Supplement: Supplementary file 1 [file 13564313]

mnemonic	year	X1_1_6_6_1	X1_1_7_6_1	X1_1_7_4_1	X1_1_9_3_1	X1_1_6_5_1	X1_1_7_2_1	X1_1_7_3_1	X2_2_1_1_1	X1_1_8_4_1	X1_1_4_6_1	X1_1_5_2_1	X1_2_1_1_1	X1_1_7_1_1	X1_2_2_2_1	X1_1_8_3_1	X1_1_8_5_1	X1_1_4_5_1	X1_1_9_1_1	X1_2_2_1_1	X1_1_1_2_2	X1_1_1_5_1	X1_1_4_2_1	X1_1_1_2_1	X1_1_7_7_1	X1_1_3_4_1	X1_1_2_5_1	X1_1_3_2_1	X1_1_2_1_1	X1_1_9_2_1	X1_1_2_6_1	X1_1_8_6_1	X1_1_6_3_1	X1_2_1_2_1	X1_1_2_4_1	X1_1_7_8_1	X1_1_6_2_1	X2_1_2_1_1	X1_1_2_5_2	X1_1_4_7_1	X1_1_4_3_1	X1_1_2_2_1	X1_1_8_1_1	X1_1_3_1_1	X2_1_1_1_1	X1_1_1_4_2	X1_1_6_1_1	X1_1_6_8_1	X1_2_2_3_1
E06000001	2015	0.554994791	0.60059361	0.578006826	0.42283067	0.194358571	0.150474555	0.543746482	1.382315742	0.31878403	0.401997656	0.192613956	0.374543928	0.369908809	0.823615995	0.813661609	0.243575235	0.80894188	0.52206941	0.131164617	0.916124701	0.977520852	0.637306662	1.056311085	0.360454964	0.498984023	0.374760263	0.131098784	0.864595602	0.072204237	2.227684492	0.064202074	0.224655756	0.19938676	0.908216772	0.69464956	0.181429475	1.565933682	0.411313926	0.270060252	0.117811098	0.258053887	0.088573565	0.320745589	0.733069589	0.376016079	0.212504342	0.281669474	0.419701094
E06000002	2015	0.511173386	0.553950734	0.553532821	0.392489023	0.19907095	0.139065313	0.527779306	1.272470028	0.301921399	0.374340508	0.180225672	0.338197247	0.348221843	0.788787046	0.755346351	0.233744425	0.739608007	0.48492137	0.130344715	0.861874419	0.921781687	0.585672311	0.98680695	0.331454616	0.454939514	0.340043144	0.12190337	0.782163799	0.077409673	2.000053011	0.060834375	0.216524341	0.187459306	0.869956875	0.645748634	0.17859052	1.335305919	0.366101632	0.260753016	0.125210153	0.235803155	0.087131521	0.328782574	0.679058391	0.345798281	0.208533483	0.273300359	0.398868848
E06000003	2015	0.58009077	0.616807086	0.594805552	0.438085296	0.206331916	0.157754902	0.564634637	1.389668898	0.32481755	0.41295165	0.19893905	0.395136543	0.382462705	0.831633632	0.840626355	0.255009212	0.836513116	0.534209882	0.133893439	0.943158688	1.000561124	0.666878325	1.092082629	0.37534467	0.520903729	0.386228598	0.139098275	0.896455673	0.072316067	2.309718472	0.065349593	0.23206263	0.210252163	0.926969072	0.708758654	0.187232255	1.638892136	0.435392515	0.280399447	0.11970059	0.267841779	0.092421098	0.340639667	0.76866459	0.382068189	0.221904713	0.298289188	0.42891293
E06000004	2015	0.559620408	0.610040554	0.588736385	0.431054831	0.202293125	0.149117176	0.557069833	1.309093756	0.318644628	0.402331309	0.186707027	0.373238423	0.380169402	0.811692498	0.817640243	0.247249459	0.808947549	0.52277267	0.133204698	0.907158232	0.986691461	0.629177359	1.048813937	0.352981116	0.491201037	0.376296482	0.131084894	0.854666174	0.072608684	2.185803676	0.066017555	0.229666153	0.198727131	0.912976188	0.681958786	0.1840327	1.57227728	0.403113888	0.269104405	0.123004965	0.25598999	0.086876938	0.326710851	0.741139832	0.375311961	0.216057318	0.290411183	0.430367796
E06000005	2015	0.568392142	0.620374971	0.601979305	0.439808799	0.204588561	0.153541079	0.563093804	1.330270816	0.320304381	0.407026218	0.1908021	0.379876488	0.38356963	0.822086094	0.825630875	0.250140346	0.82339684	0.53220398	0.134640027	0.925303313	0.999649475	0.648744909	1.070216966	0.361214856	0.506564685	0.379396916	0.136555315	0.873636835	0.074369879	2.253377973	0.064614415	0.231260838	0.202771906	0.926765632	0.696274574	0.187531037	1.619851734	0.417780766	0.276672816	0.118562405	0.264016491	0.090257795	0.33473695	0.751273675	0.380538464	0.219417742	0.296914983	0.435669768
E06000006	2015	0.562605311	0.616359987	0.588771675	0.437885759	0.200712039	0.148856111	0.551956379	1.378334992	0.318545067	0.399818127	0.185073049	0.382217451	0.37975602	0.823039698	0.828872157	0.24878215	0.817760734	0.526734536	0.135498702	0.900035906	0.982430211	0.631443791	1.053961154	0.354458821	0.493349091	0.382943044	0.131756638	0.869094918	0.071248748	2.231368154	0.065301438	0.228219257	0.19845082	0.914764668	0.689718365	0.182080625	1.598891444	0.414173099	0.267900808	0.125000069	0.253981913	0.086071024	0.32051463	0.75553257	0.38052961	0.212383889	0.290222447	0.432003004
E06000007	2015	0.574510231	0.62456949	0.61381349	0.440718763	0.210356847	0.153410284	0.578762498	1.275089098	0.322423232	0.408326116	0.186939502	0.378200147	0.397377982	0.812304972	0.827028899	0.253029062	0.826101905	0.533639159	0.136597805	0.920155991	1.009191837	0.641085613	1.061600073	0.355370664	0.500905944	0.382562192	0.138706335	0.861433723	0.07654519	2.203359882	0.06565095	0.236668907	0.204285866	0.929681347	0.691125234	0.188982201	1.639886675	0.405035693	0.277033252	0.121560234	0.258926232	0.088061757	0.341987961	0.759139998	0.377447466	0.222624579	0.304833389	0.44305442
E06000008	2015	0.47047172	0.516467672	0.555959107	0.353761041	0.217367321	0.132385816	0.542926127	1.084155019	0.285459906	0.350235301	0.166651967	0.301658514	0.338969173	0.751499595	0.688002083	0.229601605	0.662702181	0.445363903	0.137613127	0.8119392	0.877208504	0.532934582	0.917510926	0.302774869	0.403564966	0.301294606	0.122534807	0.6917332	0.092251319	1.70542993	0.061288159	0.215099809	0.178513491	0.849888351	0.593021558	0.182491372	1.094923098	0.307899814	0.261306513	0.143292211	0.21810316	0.088946963	0.359988657	0.61156064	0.30283736	0.215376746	0.277710502	0.384031494
E06000009	2015	0.551082143	0.599399524	0.571435931	0.42033395	0.194033773	0.152141921	0.54061281	1.506096639	0.32096325	0.402482863	0.195209465	0.389945615	0.361019406	0.830297821	0.822212585	0.246447442	0.807996116	0.521981252	0.130706332	0.925880002	0.971513693	0.655651735	1.073828681	0.368115194	0.509608374	0.374646317	0.13139447	0.871506208	0.071973964	2.281130849	0.062929549	0.222102133	0.202131514	0.892868207	0.699907132	0.182406863	1.542553585	0.42247091	0.270907219	0.11970712	0.26143856	0.089841263	0.32488267	0.778063728	0.372697294	0.214083235	0.280644139	0.414823694
E06000010	2015	0.498001486	0.550580883	0.535327745	0.389126997	0.183577908	0.133275348	0.502048571	1.35535133	0.29744871	0.365382827	0.175632924	0.338767621	0.337680474	0.793188898	0.760986418	0.224096112	0.733215101	0.480350725	0.128634506	0.844344335	0.908497101	0.575330346	0.977021481	0.32471934	0.448408146	0.344040868	0.117440928	0.773985745	0.069463181	2.020588084	0.059913789	0.208357504	0.179690526	0.838337836	0.638133588	0.170996885	1.333164339	0.363366618	0.24976445	0.123112585	0.231957727	0.082369119	0.297169033	0.703009758	0.35005694	0.195627373	0.257181467	0.392421152
E06000011	2015	0.613640473	0.651531445	0.62480629	0.454761636	0.2204339	0.167081525	0.598678338	1.326145387	0.327463702	0.42737501	0.201827414	0.417949121	0.406310951	0.823848797	0.864750583	0.264780793	0.864605392	0.54739438	0.136397712	0.968594072	1.031951457	0.691277518	1.119081362	0.389559248	0.538032523	0.402059654	0.146486064	0.941911645	0.074084094	2.360671118	0.066568735	0.241252727	0.219808869	0.965292144	0.70879519	0.196234367	1.792457121	0.453320233	0.289612049	0.110586217	0.281925208	0.093642638	0.360715211	0.821007911	0.381516084	0.235869042	0.319833304	0.445517401
E06000012	2015	0.547628257	0.592958864	0.569510478	0.420544844	0.19476222	0.148778638	0.539854453	1.363956698	0.313398531	0.396185823	0.188113686	0.377231605	0.364045345	0.803009285	0.805288571	0.240497045	0.796568731	0.510800059	0.128260811	0.900898517	0.959882191	0.63219372	1.041861651	0.355962566	0.494050385	0.370566127	0.129076066	0.854933758	0.069553568	2.199883284	0.063621233	0.22293333	0.19783629	0.885293636	0.67538961	0.179510763	1.55272025	0.408527954	0.265973896	0.112300431	0.256283713	0.086831715	0.320363237	0.748745242	0.366636298	0.210944854	0.280898955	0.413845507
E06000013	2015	0.569549447	0.611300868	0.588894156	0.429500223	0.204655816	0.153695863	0.559182479	1.310133838	0.316551419	0.404269842	0.191473727	0.385285627	0.381749976	0.80413978	0.816410637	0.248452994	0.815488457	0.521336203	0.132204564	0.916965832	0.984632492	0.644098833	1.059649916	0.362239389	0.503621008	0.378133561	0.136490071	0.873252652	0.071255255	2.221292277	0.06445192	0.230358944	0.203872975	0.90637276	0.684861266	0.184629552	1.611361	0.416470336	0.273632871	0.117218457	0.262410983	0.089012035	0.335707952	0.75290832	0.370298436	0.218247572	0.296194582	0.426713619
E06000014	2015	0.561974236	0.605692764	0.598107081	0.436484588	0.207270557	0.150660744	0.563794751	1.31425482	0.309690448	0.39492436	0.183685786	0.373816983	0.386630193	0.799637101	0.801150339	0.247247357	0.797609054	0.520090369	0.136094493	0.896538037	0.975882078	0.62537548	1.038622821	0.347382361	0.492152358	0.371116223	0.134351088	0.83651794	0.074872959	2.156707762	0.062586985	0.229122915	0.200391857	0.907276311	0.665857271	0.186647722	1.552933757	0.39729917	0.271556522	0.116301695	0.254609574	0.086247697	0.335309396	0.763473653	0.365266869	0.218881656	0.295483031	0.427591349
E06000015	2015	0.521212868	0.560235299	0.578651673	0.402569546	0.21283621	0.141395786	0.553923086	1.179664998	0.30089813	0.375984078	0.174833928	0.334365419	0.368721069	0.771190833	0.742324755	0.23821317	0.733125677	0.482499874	0.135786303	0.852959886	0.928476305	0.57860642	0.972795384	0.322691719	0.451459584	0.33239331	0.128375285	0.768510312	0.081731055	1.935618237	0.06109724	0.222265045	0.189059825	0.875135251	0.629178935	0.185918693	1.352071704	0.348380236	0.264715141	0.137244068	0.233996402	0.08733117	0.349197303	0.684910512	0.33656435	0.216945021	0.286963772	0.409815832
E06000016	2015	0.430676884	0.470488132	0.549354575	0.313630224	0.240077436	0.125784773	0.561753185	0.909194364	0.265127632	0.319016148	0.149715066	0.254084855	0.334294306	0.711275412	0.601984309	0.21494565	0.570309708	0.398151868	0.143634612	0.750167431	0.813072135	0.465650851	0.829052951	0.265149217	0.347109604	0.24751282	0.118150386	0.592275414	0.108421972	1.357427574	0.055696369	0.210688444	0.169502988	0.824462496	0.52529334	0.184878166	0.83789092	0.241643102	0.266981994	0.146846283	0.189396755	0.089365888	0.39169808	0.551990106	0.262542013	0.223821611	0.281886688	0.356347723
E06000017	2015	0.633740528	0.663839386	0.64971631	0.478632684	0.228961309	0.174278165	0.620861704	1.338690757	0.333931465	0.441096271	0.206145898	0.427474082	0.420785953	0.840409683	0.86392094	0.275359906	0.892660163	0.56551494	0.140003921	0.991715507	1.062264223	0.714769955	1.14705472	0.397610684	0.553239032	0.411877709	0.15559574	0.959638458	0.079054284	2.415758176	0.067151642	0.248468783	0.228924053	0.99872227	0.731931431	0.203581676	1.837360708	0.465382634	0.302425404	0.126604119	0.292377377	0.098269974	0.383230332	0.824684015	0.390276504	0.244687207	0.33825618	0.459981821
E06000018	2015	0.464094697	0.502416361	0.531006362	0.369425616	0.202583129	0.128820847	0.508601636	1.221326859	0.276606532	0.338402567	0.163463513	0.300588891	0.333265746	0.764682014	0.666262876	0.214706022	0.647800683	0.443034333	0.147302013	0.776756775	0.847012574	0.516145233	0.896102876	0.28928191	0.399003017	0.302691272	0.110337505	0.677263992	0.083248635	1.722275722	0.05627971	0.201069134	0.171747648	0.826861944	0.583015343	0.175040455	1.088702412	0.303917174	0.247738511	0.133757641	0.21594134	0.086333925	0.317107444	0.639171291	0.310597732	0.200552887	0.261465216	0.382954073
E06000019	2015	0.595492477	0.639587489	0.607387948	0.452909849	0.214371084	0.164680588	0.58607752	1.384266567	0.323138125	0.424034288	0.200868269	0.411568475	0.392166442	0.820151898	0.846282343	0.260282815	0.850022942	0.543209359	0.135916413	0.962867181	1.017554701	0.684287427	1.109743431	0.385157825	0.529551821	0.395421701	0.140951631	0.917200596	0.073907464	2.332376582	0.067211302	0.237099202	0.216193215	0.945278008	0.70499538	0.19465019	1.691317136	0.446602796	0.285690846	0.113632773	0.279118033	0.092819221	0.356242059	0.799882104	0.378422457	0.231806068	0.309945394	0.439088926
E06000020	2015	0.535397371	0.587932282	0.572660735	0.413844976	0.197532023	0.143939416	0.542197065	1.296154633	0.311857267	0.388992411	0.183079426	0.360244092	0.364801817	0.804988025	0.799429438	0.241085918	0.781662005	0.506269386	0.132065576	0.888344262	0.964951115	0.611194905	1.023782435	0.343058637	0.471535123	0.365545126	0.128171651	0.825235177	0.073015041	2.110487007	0.065421054	0.224003342	0.192454876	0.888779252	0.669680283	0.180198954	1.463084302	0.386376352	0.263361806	0.127932367	0.247885121	0.085561249	0.322915999	0.720142879	0.362293108	0.209962465	0.281536826	0.416955454
E06000021	2015	0.508277478	0.550924287	0.564465418	0.387724808	0.204840742	0.140595784	0.538327553	1.276147171	0.29497448	0.368684239	0.177725969	0.339281863	0.350727814	0.778979464	0.744675211	0.23478985	0.729938335	0.479362683	0.13258019	0.850187409	0.909805222	0.581631168	0.979927063	0.328275923	0.445198024	0.334034359	0.125382554	0.770437314	0.081124595	1.956391046	0.059589636	0.216764878	0.188314895	0.868461205	0.631197601	0.180706103	1.307800243	0.358405916	0.2643857	0.133979765	0.234679739	0.088077003	0.33765856	0.692887412	0.333817147	0.21183234	0.280143588	0.393148387
E06000022	2015	0.595767012	0.638355438	0.626496918	0.453082292	0.222140048	0.160830057	0.597511159	1.340940892	0.325490885	0.418279152	0.193613685	0.395141102	0.40700196	0.821879423	0.833345693	0.261680895	0.835655146	0.543925879	0.142153787	0.944100527	1.016741277	0.660303697	1.08863192	0.367416775	0.520161043	0.388049924	0.140723197	0.88122794	0.078099532	2.252696519	0.066147606	0.241854805	0.212516769	0.949760708	0.692217737	0.196729605	1.661952887	0.419555879	0.285517706	0.113207984	0.267344686	0.090729464	0.36094504	0.798445262	0.378965724	0.233651782	0.314352827	0.447826355
E06000023	2015	0.531765214	0.590144478	0.594703329	0.433297333	0.210983471	0.141210713	0.554889227	1.287928407	0.302568336	0.378226912	0.17584626	0.344453004	0.387394365	0.796433096	0.764847961	0.237048306	0.759213858	0.50926164	0.144485358	0.852369532	0.953019431	0.580360685	0.99124454	0.322949569	0.461176653	0.350109166	0.128357722	0.782447291	0.078484495	2.014313349	0.061856837	0.225434854	0.187447126	0.892308903	0.639551463	0.186577266	1.404672259	0.359762193	0.264917467	0.13040442	0.241050324	0.083216163	0.32903096	0.715521851	0.359343208	0.21477388	0.285306321	0.427396411
E06000024	2015	0.626034195	0.660027798	0.644989844	0.463607332	0.229065728	0.169247316	0.617773538	1.325380042	0.335446001	0.437323833	0.204492579	0.419416653	0.419390526	0.83815981	0.871404635	0.271593972	0.879323546	0.558086874	0.141041071	0.984521268	1.050258174	0.699225728	1.134004893	0.390329164	0.546673988	0.406398755	0.148671608	0.947995139	0.077145545	2.382852145	0.068227717	0.249152338	0.222117431	0.981301231	0.717426826	0.202548576	1.805719021	0.451843257	0.296980103	0.118694362	0.284808807	0.09516241	0.375012953	0.829453731	0.387256978	0.242437646	0.328019851	0.460267429
E06000025	2015	0.595593246	0.646377194	0.631457357	0.458373261	0.219755806	0.159486308	0.60252305	1.294992955	0.334637371	0.424777723	0.195876831	0.392478677	0.411325489	0.834618782	0.854850804	0.263118272	0.85153294	0.552737125	0.139869609	0.955282691	1.047102626	0.665501533	1.101757505	0.369955247	0.517651054	0.397142178	0.142028439	0.896128094	0.077759669	2.280831766	0.069011026	0.24684787	0.212300249	0.970412721	0.710790408	0.197768307	1.692096591	0.422023391	0.287267311	0.124236046	0.272494769	0.09117669	0.356143903	0.792916327	0.390397092	0.233909287	0.315630781	0.457342045
E06000026	2015	0.563827706	0.613067873	0.601452099	0.438859932	0.209857992	0.152291182	0.567406607	1.38709092	0.318001488	0.402976365	0.189694352	0.376434769	0.386707139	0.830782543	0.818430322	0.250433574	0.81427064	0.532516341	0.13994189	0.915290389	0.99317893	0.634355634	1.063287205	0.356635031	0.497000633	0.377560955	0.134055444	0.851191558	0.076124864	2.197875323	0.064823336	0.232196478	0.202528048	0.929543454	0.686265041	0.188882889	1.54701466	0.404566113	0.276789567	0.128823216	0.258945146	0.088745187	0.336136933	0.763849107	0.375943464	0.219611627	0.296603145	0.431490465
E06000027	2015	0.615798953	0.650721388	0.630815545	0.456025918	0.22591336	0.171946856	0.605274779	1.486011541	0.332565485	0.434640741	0.210837794	0.425491677	0.397632296	0.850998209	0.870258479	0.271679186	0.871987342	0.553788876	0.14083337	0.997263707	1.036543062	0.714537208	1.15555854	0.404238227	0.550999728	0.401903062	0.144443775	0.954869824	0.078959756	2.422766903	0.066588003	0.241820954	0.224641872	0.976544364	0.724598497	0.2028714	1.70760158	0.466641994	0.298713939	0.120880482	0.288450445	0.098562789	0.373917353	0.84398527	0.38397901	0.242297697	0.319725897	0.44365322
E06000028	2015	0.560193693	0.608110601	0.600449094	0.431419741	0.20797948	0.149594485	0.565534165	1.372006492	0.313094556	0.397869219	0.185156301	0.371444842	0.386954748	0.806125737	0.798486888	0.242592844	0.788693292	0.517792456	0.138055524	0.902000335	0.971271428	0.623784008	1.044080703	0.346001354	0.496346264	0.36427525	0.131375341	0.831276076	0.076488912	2.157683745	0.061687423	0.230252248	0.197618152	0.889896457	0.658201803	0.189013546	1.523745067	0.393462906	0.273316871	0.109324568	0.252099687	0.0871104	0.341118799	0.773803977	0.367195869	0.22023348	0.290460344	0.431377292
E06000029	2015	0.611585779	0.649324456	0.6339804	0.462978149	0.22163682	0.166133201	0.602335155	1.372149304	0.330516563	0.430930352	0.201909236	0.411403739	0.408741896	0.839706622	0.863254865	0.267274421	0.862102836	0.553350693	0.140079468	0.973520162	1.042312318	0.690905317	1.1245945	0.384602056	0.541129125	0.399086869	0.144624967	0.923919056	0.077086073	2.360408277	0.066645113	0.244316428	0.217990753	0.9614647	0.713860564	0.200740269	1.72191212	0.44303138	0.292663759	0.126686033	0.279015235	0.094725239	0.363240337	0.822299581	0.388547354	0.236773834	0.318729507	0.45425672
E06000030	2015	0.555608308	0.615985225	0.618680097	0.429512046	0.221959594	0.149509692	0.590652412	1.240628113	0.319368456	0.402256845	0.183613268	0.359588757	0.400009757	0.811792341	0.806742081	0.253431431	0.796490207	0.524064068	0.141683023	0.907717701	1.002868874	0.616366087	1.042171666	0.343722898	0.482305013	0.364330124	0.137310218	0.830030662	0.082422226	2.087532559	0.066405289	0.239106988	0.199985726	0.932619437	0.674370816	0.194234127	1.512366052	0.375642504	0.279004378	0.132140477	0.249942664	0.08802944	0.361781652	0.730409991	0.367875929	0.227373248	0.303643356	0.439690781
E06000031	2015	0.512749106	0.563072729	0.567619847	0.404311288	0.203231415	0.137372182	0.540346392	1.200455367	0.300990013	0.374678072	0.173907122	0.3319846	0.361002305	0.777641898	0.75401943	0.23471493	0.732016753	0.484117767	0.135320753	0.849474774	0.932305275	0.573366902	0.974279671	0.321767276	0.446648556	0.339561063	0.123716502	0.770414703	0.076803703	1.951762867	0.06365514	0.219292816	0.182496784	0.871746555	0.631715263	0.182069625	1.333338573	0.352272841	0.257487671	0.139774132	0.234105189	0.084807531	0.331368494	0.687526068	0.344472737	0.210568737	0.276570105	0.411582181
E06000032	2015	0.445755638	0.490810375	0.545755038	0.339358742	0.231865309	0.126050162	0.553669039	0.906181409	0.273587444	0.332700735	0.155201061	0.267595632	0.347269376	0.707515881	0.628641687	0.219090139	0.606380426	0.414977544	0.143524963	0.765739075	0.841550201	0.482630161	0.850924904	0.27135653	0.365477571	0.269685631	0.124066457	0.628725666	0.097872029	1.477871645	0.059121494	0.211263967	0.169407897	0.825821969	0.54599169	0.185716667	0.971037963	0.26216706	0.257192728	0.142655499	0.202902017	0.086170485	0.388039591	0.57219483	0.27554615	0.220075184	0.280247242	0.375317691
E06000033	2015	0.569441908	0.613945964	0.605816118	0.437281194	0.213909309	0.154110059	0.574582733	1.270243026	0.31521637	0.406303727	0.188233334	0.374299019	0.391276868	0.807458777	0.807075846	0.249693926	0.802082461	0.523909962	0.13964859	0.915721157	0.993793446	0.635105386	1.052056676	0.355798702	0.500031456	0.371485754	0.136535436	0.845777724	0.076980284	2.170781632	0.065763634	0.23443947	0.201479448	0.911986325	0.674516146	0.192555209	1.566306206	0.400545446	0.277416308	0.125872882	0.258129344	0.090331623	0.347741315	0.746232494	0.369022865	0.225176723	0.300212988	0.438612181
E06000034	2015	0.526497854	0.580787623	0.583491314	0.4202869	0.209255828	0.143153105	0.547412403	1.175523523	0.306641432	0.385649464	0.179313261	0.336259152	0.377370856	0.796935686	0.76257427	0.23831223	0.753235448	0.501110884	0.14359928	0.862097118	0.96050278	0.578804977	0.990938407	0.329802213	0.454236847	0.352631901	0.12695229	0.792434601	0.075962708	1.996866488	0.066988294	0.225360355	0.185523955	0.898124244	0.649800571	0.186080285	1.410354887	0.360066845	0.262933797	0.146213249	0.241351882	0.087918105	0.334945444	0.679542133	0.353743616	0.215463636	0.286800209	0.43911088
E06000035	2015	0.555013459	0.603458001	0.602733769	0.435640167	0.211945816	0.148643632	0.566179774	1.268878277	0.317721875	0.400181275	0.184568996	0.363299952	0.387453214	0.81750261	0.801138612	0.248698145	0.797432614	0.522039522	0.140787162	0.896426097	0.986592022	0.61678633	1.036610778	0.345544247	0.482363564	0.367789849	0.134007282	0.832639359	0.078736263	2.121031605	0.066585152	0.231055365	0.198742297	0.921635821	0.678950497	0.187869473	1.522865286	0.386345784	0.273223463	0.1360471	0.250817637	0.089213422	0.33957172	0.71705401	0.371217969	0.218793155	0.29881075	0.438761268
E06000036	2015	0.587923976	0.651999991	0.641710548	0.459229403	0.223587748	0.152675579	0.604471806	1.194347974	0.326159979	0.415477	0.183664809	0.368963614	0.425426392	0.815867394	0.835756827	0.258541804	0.835732002	0.549200949	0.144431483	0.917333783	1.034864668	0.629076971	1.059128848	0.347826016	0.499226164	0.385276519	0.143092978	0.855770862	0.078648045	2.174018792	0.068952748	0.24671764	0.202204623	0.959892645	0.685846377	0.196800825	1.687762586	0.390404348	0.280506444	0.13079456	0.255842995	0.086077372	0.354483878	0.754201389	0.384439138	0.230277662	0.316388366	0.464415372
E06000037	2015	0.612657329	0.669229654	0.649196441	0.469051476	0.229738999	0.161143039	0.62034332	1.217521511	0.329580365	0.426888459	0.189223839	0.397441426	0.431747747	0.817902367	0.853126523	0.264926097	0.858889142	0.553973886	0.143184087	0.943081814	1.051201923	0.656695903	1.091231863	0.364965294	0.521153444	0.396037753	0.147984404	0.893614581	0.077670795	2.251559809	0.069255995	0.250752173	0.21391561	0.971750882	0.698370738	0.199895326	1.791013744	0.415753175	0.286532089	0.123600245	0.266745408	0.08839082	0.364986052	0.783459612	0.387832987	0.237599305	0.326856251	0.4677656
E06000038	2015	0.506014542	0.560178538	0.591749899	0.404776882	0.22321847	0.136837109	0.570156878	1.084141419	0.29161785	0.363870381	0.164151067	0.312665614	0.385951971	0.754662009	0.712402814	0.227869008	0.700665563	0.473823488	0.146641722	0.808705434	0.915024778	0.537016019	0.925972336	0.297090679	0.421816815	0.317407759	0.130989236	0.714328774	0.088069985	1.780822411	0.061329645	0.223236049	0.180517934	0.87072971	0.595229275	0.187955702	1.283145444	0.31179525	0.261759348	0.132971841	0.226704633	0.083434586	0.356226196	0.654492447	0.326273836	0.220893653	0.295640577	0.417251307
E06000039	2015	0.445630479	0.497968561	0.572013406	0.335982299	0.247665678	0.127044738	0.592343316	0.790337334	0.27567101	0.33402229	0.148052987	0.252557307	0.37374592	0.674441538	0.649437093	0.219892668	0.600123493	0.410829895	0.14512738	0.746366588	0.838405876	0.454315504	0.824547285	0.258769491	0.339777603	0.255253416	0.130219789	0.590459926	0.106002684	1.3415336	0.059504028	0.222351861	0.168830035	0.828745101	0.525015723	0.195000271	0.940330439	0.22760871	0.263098219	0.163294893	0.195021769	0.083811109	0.432217543	0.593129902	0.265135914	0.231838264	0.301032851	0.376533759
E06000040	2015	0.608378932	0.651368222	0.659765976	0.45467537	0.241770331	0.161334497	0.638233884	1.094395468	0.326100327	0.417937247	0.180844188	0.389934046	0.44030666	0.790322066	0.824954995	0.262777734	0.827138588	0.531825273	0.144406346	0.919042267	1.02467183	0.646942209	1.05425235	0.349181294	0.521106795	0.370623967	0.155543667	0.855639044	0.082492168	2.163811245	0.06949662	0.248723055	0.210806152	0.943460234	0.660235909	0.20099867	1.795119073	0.392712518	0.290010209	0.109374457	0.26042655	0.090060968	0.388900106	0.780639455	0.370299412	0.243103146	0.339228029	0.466618449
E06000041	2015	0.60599574	0.655349058	0.652509748	0.451514785	0.237428693	0.160684767	0.62772152	1.086409613	0.328675415	0.421533229	0.182907833	0.388539608	0.432756898	0.80003101	0.832533004	0.26279219	0.837576065	0.540229348	0.144832072	0.929982322	1.039260568	0.648231792	1.06237504	0.353734394	0.514471455	0.383346468	0.150122496	0.863721128	0.079937836	2.169948639	0.073198593	0.248618649	0.210254896	0.958238564	0.673990035	0.198745795	1.773444351	0.399303453	0.28701111	0.109344118	0.263496788	0.089987017	0.379063335	0.765020326	0.377473135	0.239316245	0.33492142	0.466908969
E06000042	2015	0.52804251	0.589333734	0.603103734	0.420044572	0.219644958	0.142178395	0.569458036	1.143062315	0.308310548	0.384813531	0.174343927	0.336777781	0.38665547	0.793286438	0.75812137	0.241538323	0.748668884	0.499826256	0.147507696	0.858847166	0.958859179	0.573830347	0.985527006	0.323562364	0.446255641	0.346176117	0.130579794	0.779753953	0.083046886	1.943834372	0.066666786	0.229379364	0.186283524	0.906942651	0.642108571	0.189489873	1.387416737	0.348211746	0.265639466	0.140966005	0.242169526	0.087043582	0.349298058	0.677480691	0.349959275	0.222176611	0.296742998	0.436351299
E06000043	2015	0.552968034	0.619758317	0.611820752	0.438678689	0.211506895	0.14600943	0.570774657	1.408218714	0.313046465	0.395609365	0.178283694	0.36376088	0.397800443	0.828424121	0.797989542	0.244249888	0.79417918	0.532502069	0.148280754	0.887881458	0.983861952	0.610059837	1.032789855	0.333761641	0.490537882	0.36701821	0.134925017	0.800590793	0.081826988	2.125478924	0.063162541	0.234257031	0.196300354	0.904055731	0.672458418	0.188989225	1.49691564	0.377908861	0.272300527	0.112065125	0.242756088	0.085328	0.333357149	0.747919045	0.378414307	0.218398669	0.293470765	0.441238657
E06000044	2015	0.523840586	0.573898618	0.567774627	0.412115144	0.196366359	0.139034726	0.533481958	1.310913944	0.303225396	0.377216912	0.174156328	0.338634432	0.365518655	0.79473659	0.765005906	0.23182102	0.749615003	0.499779524	0.137049573	0.854513334	0.935830458	0.579565145	0.988617267	0.322817118	0.456002006	0.350112349	0.122891902	0.769646878	0.075631476	2.014866583	0.061691857	0.220509339	0.184363273	0.866153535	0.643591423	0.178692412	1.383590904	0.359913562	0.259637401	0.121714369	0.235889257	0.082541204	0.314361085	0.707074583	0.35590378	0.204377467	0.274159012	0.413674514
E06000045	2015	0.515296122	0.568842535	0.571633726	0.416776387	0.200285911	0.13777158	0.538361851	1.320245707	0.296853091	0.370485507	0.17169305	0.336957814	0.368425117	0.787275243	0.750608936	0.229873987	0.736542482	0.494826727	0.138630382	0.839425666	0.929285698	0.567433123	0.973587429	0.317346888	0.44877909	0.343020456	0.122848505	0.758845264	0.077271221	1.969289202	0.060359798	0.21944468	0.183969747	0.868051439	0.631497373	0.180855644	1.347629996	0.350021006	0.259676963	0.131235724	0.234017396	0.082060008	0.319962677	0.706822399	0.351413458	0.206964892	0.275034793	0.411285381
E06000046	2015	0.63263742	0.661989832	0.635904094	0.464317819	0.231346268	0.175647072	0.614723567	1.435687938	0.336044506	0.442451904	0.213002529	0.437768455	0.411899782	0.848232015	0.87854889	0.275791445	0.885029787	0.560978152	0.141351529	1.000883672	1.046427971	0.718035116	1.157662274	0.405229727	0.562640754	0.405644115	0.150712859	0.966921462	0.077640228	2.439407741	0.068555293	0.247418698	0.230364537	0.979753764	0.73237987	0.203023803	1.781845165	0.475417604	0.302562992	0.117745612	0.289651586	0.099622986	0.385961803	0.834112204	0.389145033	0.246089613	0.330197316	0.450432532
E06000047	2015	0.583922171	0.62790751	0.606819427	0.442579016	0.207366771	0.15795907	0.570761321	1.403417292	0.323949234	0.413775924	0.196688071	0.398116372	0.389844717	0.836458239	0.843654931	0.255867225	0.843473131	0.541197149	0.136292431	0.941365821	1.007445895	0.666839156	1.094623572	0.373581316	0.520419459	0.391822491	0.141058459	0.901227529	0.073765645	2.316923043	0.064688835	0.234110715	0.210253765	0.937387532	0.708781751	0.1886485	1.672195695	0.433822909	0.281674789	0.116653584	0.269553002	0.091497333	0.340586588	0.785512284	0.383690015	0.222612024	0.303088717	0.437161561
E06000049	2015	0.599673617	0.648901829	0.62531859	0.4513146	0.219831018	0.162610759	0.597296174	1.291671077	0.325892542	0.422656395	0.195359414	0.402858848	0.405801712	0.816673522	0.844356263	0.261029646	0.850398136	0.544032714	0.138358727	0.952288829	1.022608177	0.672355865	1.098548033	0.375769145	0.524261499	0.394400074	0.142931484	0.907286142	0.075943198	2.292329627	0.067537883	0.240946938	0.213230994	0.953192174	0.697708693	0.194997404	1.740670988	0.433249688	0.285125712	0.107752673	0.273450004	0.091279502	0.359069657	0.793530876	0.378876846	0.233761302	0.314677615	0.449226494
E06000050	2015	0.593700535	0.635304486	0.617431564	0.447331972	0.213460701	0.158840813	0.583192757	1.323262486	0.324400222	0.416571671	0.194400299	0.39877055	0.399251639	0.820960647	0.844290093	0.25807066	0.8444528	0.539003827	0.136499967	0.941838422	1.014337638	0.665910683	1.08762392	0.370718289	0.521802713	0.392176462	0.142336816	0.901961413	0.073752956	2.295346665	0.06543815	0.237943648	0.210830236	0.939600826	0.696796807	0.191294515	1.705815379	0.429453447	0.280860712	0.112634293	0.270180014	0.090022405	0.348485832	0.79328871	0.378382842	0.227869322	0.309064858	0.443526773
E06000051	2015	0.603068462	0.647972744	0.62072287	0.453998986	0.219142469	0.164926788	0.597040935	1.356010492	0.325084532	0.423490955	0.200296661	0.411943029	0.404962529	0.816806451	0.851342974	0.262136015	0.854440655	0.547245802	0.136635011	0.958713078	1.022975362	0.6814402	1.109567207	0.383682491	0.530578121	0.39613198	0.143658418	0.921324549	0.074523413	2.326896265	0.066761627	0.240349988	0.21848604	0.957286154	0.703727427	0.196233027	1.740573912	0.444237915	0.287730791	0.114614986	0.277426897	0.092000656	0.361365479	0.810868331	0.380404307	0.235345204	0.316378022	0.444058483
E06000052	2015	0.624805536	0.670350755	0.632485796	0.465722941	0.22634728	0.173138133	0.611787825	1.44488756	0.335289023	0.442417582	0.210354449	0.433082491	0.40878227	0.854999152	0.882581204	0.27270694	0.886769971	0.564787299	0.142317547	1.002667985	1.05527737	0.713466171	1.158922001	0.404063897	0.553958869	0.411055573	0.146854892	0.957226832	0.077380705	2.431056041	0.069981188	0.246302557	0.226044426	0.984607186	0.734250268	0.202688736	1.762875643	0.469152507	0.298854654	0.119554836	0.290018525	0.097702916	0.373473092	0.834200597	0.392558003	0.241912161	0.325216227	0.454176937
E06000053	2015	0.663103168	0.674345639	0.714791987	0.515970753	0.246969171	0.181061081	0.679062384	1.283572103	0.325170603	0.451660342	0.227340022	0.472014851	0.448089672	0.855619391	0.889578448	0.280933874	0.908651977	0.594733599	0.172647184	1.063930758	1.058330707	0.789907791	1.207732838	0.419245472	0.568192861	0.412150667	0.148319511	1.074701745	0.079287075	2.52448587	0.075419236	0.29632757	0.23722435	1.015501056	0.715890279	0.22643477	1.694394847	0.46780619	0.32439583	0.129141286	0.299476454	0.112447774	0.453050926	0.908600005	0.3829997	0.285555221	0.330478849	0.479855297
E06000054	2015	0.611228458	0.662259628	0.639718711	0.465885308	0.22459024	0.165575908	0.611797829	1.324088169	0.335395943	0.433365039	0.200461188	0.40767503	0.415056902	0.839990812	0.866888499	0.269813202	0.87000181	0.560042593	0.142235295	0.97509129	1.054374135	0.686109384	1.12699924	0.383353807	0.533484487	0.405384689	0.144359559	0.928425353	0.077640075	2.344548121	0.069415898	0.247680697	0.217309694	0.98544378	0.720726293	0.201294551	1.759074139	0.439591316	0.291909088	0.124082971	0.27949994	0.093319887	0.364149025	0.807219677	0.391694261	0.238869568	0.323071984	0.462487366
E06000055	2015	0.550633362	0.600440039	0.614721407	0.41788827	0.225959282	0.149356746	0.59031366	1.133216135	0.310227345	0.391825457	0.179949717	0.349625734	0.396515163	0.771502402	0.776945844	0.249524572	0.768402556	0.505577222	0.139929355	0.882582555	0.969685244	0.602043686	1.012001563	0.337581383	0.469150553	0.348163073	0.136043005	0.803589116	0.082319254	2.00268074	0.064029108	0.235422426	0.198282757	0.914206717	0.642075103	0.194579661	1.493595916	0.365025988	0.276007247	0.125559506	0.248843594	0.087755223	0.368094386	0.718569039	0.347330724	0.231232528	0.306971258	0.430228012
E06000056	2015	0.588068464	0.648095016	0.627999899	0.454055249	0.221094403	0.156867679	0.596029157	1.215612986	0.323935733	0.41473733	0.187761257	0.384978479	0.413266261	0.81179601	0.832840102	0.257954877	0.833900164	0.542289995	0.141565641	0.924187504	1.022349117	0.643387572	1.070554015	0.358878082	0.506455435	0.386933905	0.142102002	0.877828647	0.075410411	2.211462956	0.069698464	0.241765118	0.207335786	0.9535546	0.687739472	0.194159158	1.71751545	0.409702945	0.280052312	0.118809261	0.263995698	0.088191387	0.354216009	0.765751869	0.379097901	0.231639978	0.314311931	0.457124824
E06000057	2015	0.608282445	0.649730871	0.623162461	0.45220754	0.218107269	0.166024401	0.594496582	1.400753396	0.329945223	0.427963084	0.204878603	0.417142034	0.4011803	0.841401108	0.868310977	0.264874009	0.867894454	0.552838981	0.138311059	0.975105747	1.035126786	0.690934968	1.127277245	0.391377718	0.538469802	0.403947355	0.145360057	0.941132663	0.075284196	2.379902908	0.067575771	0.241286854	0.219288447	0.971079101	0.721670908	0.195740419	1.740275815	0.456076103	0.290799546	0.114515817	0.280695253	0.094617289	0.358441502	0.814153864	0.387892027	0.234030987	0.316151405	0.445191272
E07000004	2015	0.584328722	0.647795693	0.63061651	0.452114677	0.223958514	0.15627866	0.600658256	1.220810136	0.327493578	0.416851336	0.188582248	0.383781788	0.410872387	0.819651085	0.831683131	0.262738532	0.828367468	0.54074258	0.143663301	0.934669515	1.03305475	0.646992622	1.078200856	0.358859662	0.506119701	0.38558752	0.141324433	0.869778008	0.078883342	2.197555662	0.070238354	0.243573537	0.206385608	0.95521651	0.693239181	0.196845028	1.663234189	0.403383197	0.280968607	0.12450988	0.263828909	0.089370215	0.359920349	0.760296974	0.380959007	0.23476741	0.315202186	0.460285205
E07000005	2015	0.612779447	0.650986633	0.642968494	0.45578204	0.236695598	0.166553318	0.634618256	1.108006754	0.333342059	0.43120918	0.193388661	0.396005389	0.424102157	0.796845091	0.830279085	0.267072129	0.841499441	0.542800475	0.141353437	0.961540719	1.039897589	0.672808117	1.089978144	0.37081933	0.526151746	0.390476445	0.149902504	0.896299712	0.081682757	2.216514739	0.07261428	0.25115518	0.217242059	0.969380296	0.687754482	0.202870605	1.802527306	0.418548264	0.294055495	0.106061096	0.272985069	0.094111343	0.391193076	0.783478584	0.372934618	0.247360712	0.331625876	0.462654121
E07000006	2015	0.607833148	0.644132569	0.652988404	0.45179726	0.241499359	0.163871127	0.633641586	1.106208725	0.330940434	0.426479175	0.194655668	0.386823675	0.429596739	0.791267335	0.826043432	0.270546467	0.831450351	0.537598512	0.141611292	0.949200759	1.027032795	0.661808763	1.076787351	0.364925641	0.5246801	0.374955742	0.150984139	0.87710679	0.083388464	2.185488598	0.067595083	0.250037329	0.217282494	0.956038753	0.679371047	0.204597519	1.74575983	0.405706032	0.295514977	0.108546468	0.265753167	0.094521989	0.397235662	0.773724691	0.366891421	0.249036484	0.335899407	0.458214118
E07000007	2015	0.559935082	0.610153278	0.630687379	0.420479217	0.238664561	0.153489566	0.616081759	1.059843284	0.31614804	0.394622374	0.180733695	0.351397271	0.408903456	0.770580425	0.771613867	0.256090985	0.766282948	0.505141304	0.143473155	0.887418326	0.980371013	0.605408144	1.015287504	0.336502606	0.472204863	0.345430882	0.142294365	0.79924187	0.086386867	1.970781616	0.066378669	0.239945368	0.200802189	0.9266642	0.640156743	0.200143726	1.541297108	0.358683783	0.282277695	0.121831529	0.247132272	0.089734162	0.387837625	0.718079306	0.346439534	0.242041345	0.321680113	0.440044888
E07000008	2015	0.525625059	0.580834502	0.609304043	0.425714878	0.220810662	0.140091272	0.578338871	1.173784012	0.293743712	0.366546095	0.164095322	0.337242002	0.400817115	0.755266001	0.730263416	0.231911002	0.727592244	0.489319703	0.144111259	0.814230865	0.924272792	0.557277083	0.951066667	0.304108782	0.445421949	0.330041088	0.135752794	0.734687176	0.084216898	1.875036476	0.058369618	0.224626926	0.187791534	0.874044347	0.600482259	0.188898273	1.401527056	0.329323523	0.26158906	0.123275622	0.22938962	0.080611378	0.35290267	0.718770586	0.341228057	0.221095209	0.29975208	0.4218313
E07000009	2015	0.601214451	0.652506407	0.627662626	0.466765559	0.216197348	0.160012567	0.594891432	1.263472183	0.324197594	0.424599678	0.190081184	0.396718798	0.410355697	0.81825564	0.8418139	0.257897881	0.855059799	0.548521824	0.138871497	0.939967506	1.032091541	0.65942398	1.083304493	0.365822872	0.519002361	0.394766016	0.143223042	0.896236725	0.074014937	2.274165609	0.069379971	0.242835064	0.20890487	0.9524782	0.696097135	0.194269253	1.741631976	0.423905527	0.281694067	0.121911945	0.2700516	0.088665624	0.347238864	0.778546677	0.385328652	0.228442405	0.312562202	0.459296182
E07000010	2015	0.591638745	0.634452137	0.609355888	0.442154678	0.211965633	0.160998901	0.582623698	1.367899235	0.323653246	0.417077249	0.198153993	0.402175971	0.394210528	0.809171113	0.852847664	0.257065192	0.843338386	0.538358555	0.133832011	0.947120055	1.006396333	0.670689359	1.095819891	0.37766094	0.522499805	0.392032284	0.138280135	0.905622222	0.072171172	2.313391631	0.065674073	0.238065384	0.213161094	0.936311276	0.696090182	0.192307517	1.688683044	0.4364534	0.282220045	0.117922717	0.272955276	0.090504467	0.348132359	0.812189208	0.377437675	0.229054063	0.307223334	0.434486167
E07000011	2015	0.603234581	0.658695711	0.627905901	0.467045259	0.215725231	0.158934142	0.593561862	1.298512243	0.327428897	0.423745677	0.192340867	0.399059304	0.414435145	0.829080235	0.86356369	0.259583956	0.867364717	0.555489497	0.139639062	0.943140702	1.045087644	0.661575702	1.097121823	0.3687531	0.517184599	0.402979827	0.141990265	0.909186807	0.072882879	2.308428877	0.068861628	0.244185564	0.212447664	0.969424376	0.707991065	0.193167902	1.765619313	0.430693653	0.281274192	0.129509773	0.27075199	0.087389351	0.340221757	0.79136902	0.39239153	0.228061842	0.31640998	0.458541251
E07000012	2015	0.605620972	0.651480074	0.637775735	0.448507008	0.229809148	0.158721396	0.612153272	1.133010886	0.327126095	0.416521951	0.18485461	0.390263395	0.424854554	0.791540234	0.840303527	0.260667096	0.837675877	0.536319363	0.141394567	0.921436403	1.025752153	0.651819976	1.063404309	0.357216315	0.5120453	0.381353685	0.144013149	0.877809383	0.075656667	2.20101854	0.06957282	0.245154692	0.210726143	0.951985405	0.676090393	0.196208775	1.757556754	0.407532679	0.284170587	0.112034897	0.263168057	0.087693202	0.36642799	0.78494628	0.377269047	0.234792169	0.324917803	0.458838954
E07000026	2015	0.609294357	0.654249318	0.629062257	0.454075978	0.219907459	0.166051423	0.599871484	1.355151334	0.327372548	0.426143689	0.202199014	0.412473007	0.407499079	0.828737801	0.861019792	0.261715989	0.859543571	0.547753657	0.138778029	0.970545458	1.039175931	0.687166086	1.119300429	0.386394382	0.535538692	0.397142234	0.146141623	0.938548689	0.07465264	2.363724503	0.066996371	0.243655065	0.219663796	0.964784521	0.709530733	0.197874783	1.768411046	0.447006208	0.289171428	0.110319866	0.280308836	0.092860357	0.364788568	0.815530501	0.382965612	0.236956631	0.320398879	0.445772016
E07000027	2015	0.570839459	0.618763974	0.593166635	0.434413168	0.205038152	0.155413459	0.563197704	1.410073618	0.32417236	0.407231078	0.198504237	0.395154031	0.381787524	0.831369054	0.832362811	0.250471634	0.821985762	0.531601626	0.138128819	0.932976906	0.997596738	0.65903981	1.088406166	0.373106086	0.512192633	0.38327991	0.134432806	0.894107847	0.072199005	2.288063443	0.066172002	0.23083013	0.207686249	0.931510871	0.700005205	0.189531912	1.620242707	0.427560999	0.276455385	0.115105509	0.267870044	0.091351683	0.340444683	0.792207936	0.378315327	0.224112248	0.295793211	0.434449297
E07000028	2015	0.573021809	0.631598153	0.600711648	0.438167705	0.20704298	0.156683043	0.571836161	1.421087228	0.317954106	0.408861013	0.193225862	0.398147301	0.386068186	0.817935121	0.838936163	0.253229054	0.828886588	0.536935295	0.136051934	0.934396279	0.99823394	0.658636532	1.085824355	0.370165382	0.511558199	0.388852547	0.13375116	0.890365249	0.07339981	2.27611256	0.065145595	0.232686702	0.207675073	0.935743079	0.692584491	0.19052709	1.624100817	0.428352718	0.277005719	0.118850208	0.268326593	0.088571313	0.337006667	0.804610775	0.377367054	0.22420054	0.296869839	0.431673495
E07000029	2015	0.608099812	0.649830499	0.632977892	0.463036079	0.218538688	0.162166155	0.595058335	1.331429463	0.325720666	0.42622944	0.197425901	0.412449858	0.412313249	0.834725079	0.851846479	0.258934212	0.86167349	0.546687139	0.138231557	0.955415549	1.027579707	0.678216803	1.099875902	0.378210952	0.540214013	0.397483092	0.151551995	0.940096447	0.074363428	2.347251628	0.065638128	0.240709314	0.216488565	0.961639011	0.706032961	0.193540128	1.866663571	0.440844172	0.285778281	0.109463687	0.277116565	0.091851993	0.363330576	0.81276233	0.381724195	0.233868569	0.317726267	0.456629884
E07000030	2015	0.618997018	0.685332772	0.633865092	0.458445592	0.225457438	0.173745919	0.620583738	1.375907934	0.328520844	0.440665487	0.208152925	0.429257196	0.41643381	0.823654168	0.876418504	0.265500605	0.889810657	0.56719964	0.140190108	0.998857859	1.052359197	0.709364409	1.153888771	0.404002909	0.547565738	0.411738476	0.143941608	0.959588843	0.075283394	2.407191747	0.070209922	0.249267048	0.227896755	0.996113191	0.723436945	0.202811648	1.831171449	0.467005154	0.295564057	0.096817019	0.293199228	0.09373214	0.370573001	0.834377919	0.389527817	0.243837784	0.327562017	0.452697798
E07000031	2015	0.645406073	0.677001071	0.650297684	0.471160681	0.232159693	0.178824906	0.626536356	1.413728662	0.332472265	0.446462196	0.210766561	0.446599199	0.423283946	0.83498907	0.879209252	0.275318788	0.897262372	0.566352991	0.141693652	1.006082806	1.056894088	0.727626155	1.162208226	0.409539484	0.568940433	0.413839953	0.155922351	0.97717782	0.07729874	2.462948207	0.067552146	0.250922243	0.233304982	0.984990636	0.727513946	0.205749005	1.869017649	0.47925603	0.303805078	0.110855032	0.296699418	0.098089496	0.386986173	0.860772301	0.387170441	0.247824602	0.337623593	0.456234654
E07000032	2015	0.600498747	0.659486506	0.624603164	0.450249104	0.217395463	0.16370672	0.598406339	1.351039176	0.327949365	0.428543741	0.199917554	0.414372971	0.408288334	0.826971803	0.861979465	0.259123764	0.865314168	0.551461004	0.139273854	0.964875418	1.032479	0.678405155	1.114311191	0.383085154	0.529981324	0.403015157	0.140983395	0.926446697	0.073726035	2.331897536	0.069054884	0.243358466	0.21560885	0.963863891	0.707594307	0.194946311	1.764339683	0.442596502	0.28523677	0.108523451	0.278281751	0.090841724	0.352975633	0.809238704	0.386202185	0.233156967	0.315206667	0.450415336
E07000033	2015	0.568239489	0.61531896	0.595276554	0.429801187	0.200849276	0.154473822	0.560860697	1.442761464	0.326394872	0.408347159	0.198337022	0.395092144	0.378988931	0.838772714	0.854340317	0.253970537	0.829411197	0.52890998	0.132879577	0.945619981	1.006157326	0.667186204	1.095595804	0.373101129	0.516126565	0.390466003	0.133852627	0.90344257	0.071324411	2.313981037	0.06429875	0.231482464	0.206614662	0.930336622	0.706414275	0.187879536	1.607070505	0.428743389	0.276242686	0.11689389	0.267624687	0.090084956	0.329674319	0.81556796	0.380112578	0.221644837	0.29019939	0.430443664
E07000034	2015	0.576588962	0.619577524	0.602616325	0.441433294	0.207149793	0.158077904	0.568217973	1.430550664	0.326989743	0.415750388	0.203356426	0.393828455	0.383584394	0.857107856	0.848709727	0.256756179	0.843176759	0.539374114	0.138028139	0.96055744	1.022930282	0.673299472	1.106508206	0.379669214	0.52212293	0.393012133	0.138653418	0.910952936	0.07350729	2.337405936	0.06568718	0.234817765	0.210994696	0.943794158	0.717740869	0.193016111	1.605507388	0.434552033	0.282424632	0.12620676	0.274465795	0.093726358	0.340773577	0.791313083	0.382129095	0.225630253	0.29951444	0.437218187
E07000035	2015	0.648046305	0.701990495	0.654396242	0.4699847	0.237558512	0.175961734	0.635995444	1.340574027	0.337712791	0.444689378	0.209431344	0.436553667	0.43341153	0.830210511	0.89866921	0.27573837	0.899743231	0.568190505	0.143758522	1.000081863	1.061247225	0.71510113	1.162102751	0.405850717	0.560091386	0.411416528	0.151484673	0.978089106	0.076671855	2.441429751	0.06977174	0.25237478	0.235563579	1.003717062	0.72595369	0.207029357	1.91786695	0.470247991	0.300474882	0.101041739	0.289610742	0.094545992	0.390276543	0.858341929	0.389869134	0.25376829	0.338364225	0.462425583
E07000036	2015	0.592862786	0.641031562	0.619697099	0.451382606	0.211006246	0.158036807	0.584921868	1.355397865	0.32854174	0.417046952	0.194776318	0.400787781	0.403492806	0.836316083	0.861010934	0.256912867	0.853446622	0.547775745	0.136114301	0.945759052	1.029727563	0.666266083	1.095391413	0.371913101	0.523854872	0.398002238	0.142350269	0.90891487	0.072304652	2.323863275	0.067311629	0.240504888	0.21164126	0.95178981	0.707416954	0.191967895	1.735859984	0.43014828	0.280818133	0.121469599	0.271461036	0.089497786	0.341018526	0.810670809	0.38894561	0.227020241	0.30641775	0.4468619
E07000037	2015	0.595627395	0.652254209	0.619947841	0.451679407	0.217841308	0.160774837	0.592103903	1.377893194	0.328629487	0.422097093	0.198604762	0.397309087	0.403070891	0.835570607	0.859623131	0.264508264	0.858290619	0.547528868	0.14061226	0.962562673	1.043586441	0.670771408	1.112520891	0.376157016	0.523559707	0.400343983	0.139239146	0.916841611	0.074497325	2.3245606	0.066129252	0.242058233	0.211324154	0.96676702	0.715749674	0.195130757	1.704724026	0.433427119	0.282529533	0.118997748	0.27015032	0.089497016	0.348707535	0.795951901	0.386221433	0.230752635	0.314039168	0.448438528
E07000038	2015	0.615959023	0.657930528	0.636898735	0.45624546	0.222635509	0.167766439	0.607468614	1.378459767	0.333896437	0.430589956	0.205007456	0.422662026	0.411404085	0.839004506	0.873813998	0.267449301	0.87124331	0.553497621	0.138890301	0.978768864	1.043484032	0.697464111	1.131954796	0.392043726	0.543171131	0.404470778	0.147078441	0.948629969	0.075278302	2.385977493	0.067663622	0.244997286	0.223022298	0.975391491	0.717822881	0.198765773	1.794775599	0.453011597	0.292990279	0.111995929	0.284615214	0.093960423	0.369040104	0.83691061	0.386740393	0.240311745	0.322036904	0.449741242
E07000039	2015	0.585173808	0.639802294	0.61899692	0.446997172	0.212237711	0.154482923	0.579670202	1.297568508	0.329081194	0.415345667	0.192843546	0.39039628	0.400273431	0.834836975	0.85774536	0.258754823	0.84963972	0.543305237	0.138908493	0.938103244	1.027636228	0.657985277	1.090288361	0.36618193	0.506830823	0.394591266	0.139579239	0.904978364	0.072628162	2.283086255	0.06798272	0.238560969	0.205985882	0.951683412	0.704633667	0.190436351	1.682417821	0.423059702	0.277797301	0.120743375	0.267381443	0.087969752	0.337710351	0.777123665	0.384012367	0.224126413	0.304052222	0.450823237
E07000040	2015	0.662828991	0.700425517	0.668288732	0.484990275	0.245316605	0.188168105	0.653995397	1.327931567	0.335431823	0.458661177	0.21766574	0.449847276	0.437577486	0.821366966	0.883820234	0.28326858	0.911115622	0.58001984	0.140853253	1.027897088	1.064930174	0.744026244	1.18585666	0.421485866	0.579579438	0.410604216	0.158253578	0.990206003	0.079790057	2.483874528	0.069712322	0.25712014	0.243310428	1.007281479	0.724250896	0.214462331	1.924299492	0.491770364	0.31790992	0.10347637	0.30422282	0.102465525	0.41285766	0.876934272	0.388527911	0.263061196	0.353306313	0.463934748
E07000041	2015	0.567962191	0.618734328	0.612396263	0.448384746	0.213833349	0.15121827	0.578030691	1.378697659	0.314193714	0.397959769	0.185131851	0.376285866	0.398748499	0.819442823	0.810992884	0.248665186	0.798109906	0.531261593	0.143034635	0.901783058	0.993142009	0.620370345	1.049607118	0.347802233	0.495179111	0.372996051	0.133055041	0.834444033	0.077371585	2.160554435	0.063949895	0.2331691	0.202935538	0.929596076	0.669663304	0.193624974	1.532596977	0.389963869	0.27483033	0.128589647	0.25440224	0.086573157	0.340126564	0.793684802	0.373152303	0.224898855	0.298254449	0.437387023
E07000042	2015	0.624098044	0.682656273	0.638686475	0.465273762	0.225784996	0.170939274	0.619681014	1.352900492	0.331862187	0.438970333	0.20506625	0.421167286	0.417427355	0.82718691	0.870935708	0.267551115	0.884601355	0.567093535	0.140202769	0.982779137	1.047385554	0.697257991	1.141176608	0.394515869	0.542708254	0.408563664	0.143467561	0.948315102	0.076491419	2.381573027	0.070809568	0.24820029	0.2234483	0.991646204	0.715030481	0.201574003	1.817352373	0.457525779	0.295505717	0.109375148	0.284853498	0.093038649	0.365489381	0.839079578	0.389946836	0.241802046	0.328204144	0.456048991
E07000043	2015	0.618784315	0.687625424	0.635635807	0.47323363	0.228818113	0.174056541	0.621445528	1.381029483	0.332310106	0.446630392	0.208909759	0.423556707	0.41231536	0.837376152	0.876018066	0.268615881	0.888281859	0.566899123	0.1420578	1.008318524	1.058116314	0.710055111	1.158203621	0.404336745	0.54530025	0.410139723	0.143958794	0.955458835	0.077716869	2.409730015	0.071961355	0.247490329	0.22807603	0.99690778	0.724172575	0.206071156	1.773847869	0.46623125	0.298708423	0.111876787	0.293327409	0.096016835	0.37049592	0.835107404	0.391184017	0.246618608	0.327353352	0.456891259
E07000044	2015	0.655121373	0.701648418	0.660967391	0.475374204	0.236966303	0.183442705	0.644472478	1.401712048	0.343711688	0.459283313	0.219327472	0.444916903	0.427660093	0.851415305	0.905545666	0.281525672	0.920223165	0.578038898	0.143303004	1.044481539	1.086135225	0.743084513	1.196698143	0.424153384	0.573997424	0.423784679	0.153282432	1.004850656	0.080940759	2.500652621	0.069395072	0.256481321	0.236728673	1.022446328	0.74103941	0.209972874	1.892844667	0.48952849	0.311520471	0.101331845	0.306720603	0.100785932	0.398555114	0.874985152	0.389649513	0.257242466	0.348826444	0.46243523
E07000045	2015	0.636772978	0.681877769	0.649613063	0.465386597	0.231670161	0.17634879	0.632206428	1.419020379	0.341959347	0.449412393	0.214951438	0.435461452	0.418932789	0.841440212	0.899757622	0.277265713	0.898804638	0.566789779	0.141168243	1.025478923	1.070665513	0.727673964	1.17884048	0.413135254	0.565076795	0.415865171	0.14493664	0.988409071	0.077604525	2.476454626	0.06870135	0.253034453	0.233114876	1.008080968	0.735867965	0.207995111	1.813516183	0.475549212	0.302671886	0.108379632	0.298221527	0.09744731	0.38077856	0.866717413	0.393254716	0.251887998	0.333835573	0.457231587
E07000046	2015	0.629707261	0.65503269	0.633696259	0.45700241	0.226642485	0.176534134	0.616247003	1.472735044	0.338853849	0.446729024	0.216189745	0.448333582	0.403941524	0.853238048	0.879460534	0.275188116	0.889851154	0.559446272	0.139674918	1.017208698	1.043341307	0.729324056	1.16097397	0.413427373	0.564785931	0.413345612	0.151465369	0.979965376	0.078355147	2.452773499	0.067111454	0.246607602	0.230508428	0.978166704	0.736059706	0.201712806	1.779564111	0.480382149	0.303145155	0.107578989	0.298059293	0.101968658	0.389355923	0.839426312	0.383124351	0.244447515	0.329081016	0.451113825
E07000047	2015	0.645022229	0.69980033	0.659067783	0.475292373	0.240155648	0.181796321	0.641840238	1.390054195	0.338002394	0.45641977	0.215192802	0.445619254	0.42632675	0.849719135	0.887312894	0.280384356	0.911929849	0.580242304	0.145833852	1.028045464	1.074332263	0.73296835	1.180475276	0.41785159	0.566402721	0.420391667	0.155103931	0.990468873	0.081064971	2.465896285	0.070773915	0.254490016	0.235193527	1.01675995	0.739213904	0.210004684	1.878492937	0.484136216	0.309830432	0.108293271	0.302953786	0.09993145	0.398000541	0.859762117	0.39088937	0.255141585	0.343794233	0.465865919
E07000048	2015	0.674163596	0.670091022	0.659586014	0.485371161	0.241239694	0.183109052	0.644193253	1.331177225	0.343473942	0.457912307	0.215436283	0.448578293	0.432401889	0.821541615	0.893679207	0.284205623	0.897821287	0.558499539	0.136617894	1.032336249	1.066265174	0.746500168	1.174157388	0.41753423	0.593976485	0.406090074	0.15739555	0.999563348	0.076182341	2.511456076	0.066504659	0.256353057	0.241963417	0.987393414	0.718417584	0.213732305	1.926042377	0.483125944	0.311529264	0.107437641	0.304364696	0.100126523	0.405864223	0.903491376	0.384835048	0.26177547	0.347711661	0.462008038
E07000049	2015	0.673916569	0.695182421	0.671124585	0.47978325	0.244672229	0.186883098	0.658151099	1.323163679	0.345805823	0.462503003	0.21984796	0.453463061	0.442274737	0.823960255	0.900164701	0.286675581	0.921511716	0.572277063	0.138965486	1.037023805	1.078034835	0.75181925	1.193375907	0.424747795	0.588171871	0.417509163	0.155515737	1.017572116	0.07822638	2.509047741	0.067186349	0.259740855	0.247105987	1.020002909	0.731355817	0.214499632	1.973634197	0.490624715	0.314657356	0.104089033	0.30916434	0.101019471	0.405316185	0.90724948	0.392171265	0.265774243	0.354660366	0.463867121
E07000050	2015	0.638481897	0.674010854	0.64886321	0.477033602	0.230645214	0.176173247	0.623847781	1.411357437	0.339925179	0.449337654	0.212805242	0.439215697	0.419817637	0.85275718	0.890116393	0.278885996	0.902367796	0.569708028	0.140509072	1.010695496	1.067887552	0.723934128	1.164624249	0.40689488	0.563569252	0.415536229	0.15399968	0.978612093	0.077873678	2.456986062	0.069108317	0.251203983	0.231033368	0.996224323	0.73852703	0.20594538	1.827166669	0.474568317	0.303490171	0.126693319	0.29681102	0.098327816	0.386034762	0.848514993	0.391793027	0.246570854	0.335665481	0.462346148
E07000051	2015	0.638270592	0.662813895	0.640894543	0.469831214	0.22847361	0.176510912	0.621928982	1.46206547	0.341630982	0.446200707	0.216523172	0.440419157	0.41380194	0.842744762	0.900248756	0.277195869	0.896203325	0.561433032	0.137765988	1.023030661	1.064981615	0.731512105	1.175418609	0.413385778	0.566031857	0.414129672	0.148948475	1.003202923	0.075334421	2.497831633	0.067207755	0.248674795	0.233732153	1.001407864	0.737985678	0.207483939	1.815684973	0.483048799	0.303709379	0.108409127	0.296683939	0.097770209	0.381205397	0.884379031	0.38858424	0.250499974	0.330302386	0.449760248
E07000052	2015	0.667424325	0.692569332	0.667398672	0.483573309	0.245388722	0.186655905	0.65181301	1.383527947	0.339555611	0.459397738	0.219907942	0.458108642	0.435115198	0.845983237	0.895080705	0.286820086	0.917464276	0.577895192	0.143276741	1.03552162	1.075403385	0.750908736	1.19450343	0.424018027	0.587453448	0.419826648	0.161577322	1.008194925	0.080581164	2.520910752	0.068831876	0.257064679	0.24338934	1.020201135	0.73687576	0.213869794	1.936113505	0.497194747	0.317695743	0.112228842	0.305871313	0.103448042	0.413130683	0.883314082	0.389825181	0.261328137	0.354141789	0.464732748
E07000053	2015	0.613925656	0.653608581	0.633524014	0.457224419	0.225273218	0.168546736	0.604187554	1.447628453	0.33299855	0.432448265	0.20942209	0.417756797	0.405455466	0.851182119	0.88274239	0.270048842	0.877677709	0.558195387	0.140839948	0.990974328	1.04484522	0.700310213	1.147294473	0.397390573	0.542439697	0.404381406	0.143782761	0.959056889	0.076005741	2.407893657	0.06685856	0.244454177	0.221906246	0.981066569	0.724643968	0.201351367	1.745689076	0.460328783	0.295534783	0.120901595	0.286280135	0.095901137	0.368653014	0.833571845	0.382588424	0.24056107	0.322720823	0.445132931
E07000061	2015	0.600967052	0.635764205	0.623854934	0.453121212	0.223778237	0.166050893	0.596846606	1.364586258	0.322309827	0.424363314	0.199527691	0.400580848	0.401644149	0.817460642	0.828900516	0.261477193	0.836729748	0.5407414	0.140486986	0.95641601	1.010696953	0.674360822	1.099240856	0.378486307	0.53341625	0.380576436	0.141546165	0.893483014	0.079398157	2.294111188	0.064728714	0.240051219	0.216062739	0.940660458	0.69207077	0.199518432	1.658664305	0.434005398	0.292199751	0.119492778	0.273285391	0.095024518	0.36881598	0.792375451	0.374777261	0.236575158	0.316560985	0.44067358
E07000062	2015	0.564858859	0.624404127	0.592548485	0.429079156	0.205450068	0.153979137	0.561473646	1.446584708	0.320539502	0.410004206	0.194028072	0.38700854	0.377786602	0.838697131	0.835170251	0.249225344	0.823006958	0.530769369	0.140762119	0.938466761	0.996612691	0.65043743	1.086849175	0.368795278	0.506125165	0.385147658	0.131705168	0.875265652	0.075182682	2.274437779	0.064530813	0.230485935	0.201196574	0.921117769	0.698357787	0.187894336	1.567608109	0.422716644	0.276300516	0.117595145	0.262358796	0.090127302	0.333558357	0.769270145	0.38098758	0.218612761	0.291737469	0.431106024
E07000063	2015	0.631767833	0.661604398	0.644277732	0.465172928	0.233042356	0.172950027	0.62192328	1.31096162	0.332180852	0.441023061	0.205389682	0.422415311	0.417880418	0.827214796	0.862024083	0.272094515	0.871606081	0.557085251	0.1413536	0.991050661	1.046100318	0.705322347	1.133983631	0.395644211	0.55323631	0.399559316	0.150163381	0.943733407	0.079104551	2.37009841	0.068551688	0.249259227	0.225768288	0.973550679	0.711844289	0.204582511	1.793039954	0.454955228	0.300978279	0.112290466	0.284429965	0.097521154	0.385126681	0.822169319	0.38411173	0.246826527	0.331618058	0.456173665
E07000064	2015	0.661815439	0.686614537	0.649890801	0.475367892	0.239892002	0.185572097	0.638625092	1.404769816	0.336465248	0.457615607	0.219550303	0.450876556	0.423366116	0.829423524	0.892637474	0.281058069	0.906594758	0.563878538	0.139909873	1.0344033	1.057842622	0.747051469	1.185156812	0.424503203	0.585456268	0.410818543	0.154958338	1.002739263	0.078090444	2.520439997	0.066598401	0.25150128	0.241087063	0.996689895	0.726088461	0.211483939	1.898804718	0.49770753	0.31204521	0.106715943	0.303423895	0.101483199	0.407572955	0.88480818	0.381121431	0.259229665	0.346320624	0.452564085
E07000065	2015	0.643202615	0.686399667	0.657454861	0.47315121	0.241951246	0.177396496	0.644129481	1.264307777	0.334455135	0.447964628	0.206892154	0.432786966	0.432964794	0.821371334	0.868843573	0.279604706	0.888365465	0.566579513	0.142887043	0.999242676	1.059910047	0.713842177	1.14905412	0.400634489	0.559212567	0.408615265	0.15513265	0.951731938	0.080285326	2.378053831	0.070456589	0.254438612	0.231293099	0.991735299	0.716060113	0.208205848	1.878189675	0.460075562	0.305024519	0.107950843	0.28863784	0.098211007	0.398827059	0.835164316	0.386976569	0.254316208	0.343100973	0.467389543
E07000066	2015	0.561013865	0.611931	0.610795507	0.430681273	0.219019623	0.151256527	0.582869078	1.180974195	0.314965506	0.398197742	0.18443972	0.362174632	0.399283482	0.789999476	0.792132181	0.25053797	0.784941229	0.517771392	0.140764746	0.895312005	0.985064792	0.613380839	1.029759886	0.345973882	0.483581965	0.362842772	0.137386084	0.833673693	0.077553777	2.092065793	0.066645204	0.235369439	0.19930361	0.922058544	0.659420812	0.193852236	1.5520325	0.382204314	0.274460019	0.125195904	0.254292427	0.088486831	0.359118442	0.733262124	0.360614079	0.229881294	0.30362966	0.440402128
E07000067	2015	0.593331088	0.652356629	0.625234182	0.456673654	0.217104906	0.157513404	0.592137174	1.261441795	0.325140711	0.420685927	0.188669011	0.392149547	0.408952841	0.812535842	0.846766291	0.257479267	0.841605632	0.542348022	0.139508941	0.934979253	1.025772573	0.648697562	1.079387249	0.364574808	0.509571058	0.390196214	0.139378656	0.888901079	0.075203431	2.244388454	0.068454899	0.240755231	0.208019369	0.947998991	0.691815627	0.193516866	1.725477669	0.416997239	0.279094722	0.121259568	0.265866922	0.087205948	0.347649419	0.774953905	0.380479402	0.229939232	0.311214176	0.453908592
E07000068	2015	0.615145661	0.65808552	0.657890463	0.459238261	0.242946446	0.165696939	0.639222087	1.090995505	0.326041663	0.420215225	0.185621867	0.397436573	0.441329271	0.789664508	0.821886949	0.266173628	0.832283585	0.533926477	0.145282522	0.926362514	1.022717229	0.657886446	1.062005437	0.359185649	0.526985909	0.375703042	0.155848324	0.871784403	0.082068215	2.186252089	0.071733301	0.248883834	0.218322464	0.960231515	0.664517913	0.202279574	1.835768939	0.404556553	0.292791241	0.101260615	0.266883225	0.091676192	0.396987049	0.793683276	0.372236545	0.247915183	0.340119846	0.465109689
E07000069	2015	0.617633364	0.662439037	0.628051604	0.459765126	0.223820445	0.169020382	0.608351947	1.303328406	0.32931574	0.433683905	0.202360295	0.418772386	0.413459023	0.817673547	0.863870279	0.264442802	0.871721497	0.548770428	0.137537705	0.975167195	1.034853474	0.690935323	1.122055277	0.390402412	0.538833248	0.401504887	0.144185242	0.940331071	0.074653765	2.357414211	0.067658067	0.244536023	0.222601398	0.964700661	0.706191943	0.197803469	1.808722443	0.453414422	0.291013467	0.10583315	0.284818458	0.092892683	0.364159881	0.826596103	0.380608774	0.239790168	0.326047731	0.449302737
E07000070	2015	0.578870191	0.631390868	0.626683069	0.442493391	0.223325384	0.155686118	0.596225931	1.179918522	0.319253496	0.408769877	0.186367342	0.380994137	0.408151287	0.796535814	0.811906775	0.257656667	0.809675468	0.527326571	0.140693552	0.915519922	1.003807687	0.633870855	1.053054555	0.354540356	0.500005167	0.374718751	0.141246052	0.859255103	0.077755945	2.147530087	0.066733357	0.239044426	0.205086428	0.932119818	0.669674496	0.194643752	1.646540816	0.398173265	0.278656481	0.114076672	0.259901991	0.088671028	0.361954796	0.756321311	0.366598098	0.234809102	0.312591483	0.449169584
E07000071	2015	0.561060538	0.621387707	0.601736964	0.432546253	0.211441636	0.150953633	0.57501959	1.237948762	0.312986106	0.400722854	0.184406139	0.369543116	0.392995592	0.788809111	0.804985224	0.245614112	0.800627601	0.521358654	0.136959959	0.902659405	0.98608762	0.619659263	1.039672873	0.349052939	0.484446575	0.371512062	0.130812694	0.838657524	0.074471275	2.126645811	0.066204901	0.233287902	0.199355077	0.917822068	0.661235001	0.189026451	1.568130785	0.392273496	0.271332409	0.117817831	0.257153191	0.084943056	0.338087413	0.753869841	0.367476185	0.223642237	0.296905694	0.432155051
E07000072	2015	0.601584248	0.654125859	0.646993393	0.453819398	0.236497318	0.161610856	0.626248237	1.140833028	0.322193313	0.416542368	0.187134592	0.388604477	0.429563588	0.792246209	0.818785513	0.266045934	0.827759935	0.53720432	0.144336294	0.923130329	1.017346935	0.647927313	1.067833563	0.359035936	0.516684986	0.37706799	0.149086553	0.867526806	0.08101517	2.176145959	0.068870957	0.245594724	0.212489085	0.952442721	0.671806318	0.200320284	1.75191945	0.403420635	0.289491077	0.110495316	0.260992097	0.090607676	0.382152528	0.773562589	0.371496784	0.243774535	0.330627305	0.45888996
E07000073	2015	0.537201066	0.591751388	0.591117445	0.417596394	0.212998848	0.146096538	0.566818876	1.178224512	0.306594119	0.390614864	0.180631911	0.339351802	0.381012101	0.776407675	0.774205517	0.242586909	0.762765344	0.508869672	0.135629052	0.883949508	0.966180929	0.595797133	1.005438769	0.335608774	0.466519705	0.350523847	0.129467351	0.803173264	0.078420342	2.02485753	0.064373347	0.230398399	0.191915369	0.901968039	0.647907256	0.189962171	1.413996029	0.366709311	0.271441283	0.126719576	0.243776586	0.086764127	0.349523949	0.695187141	0.356099719	0.221771418	0.289973104	0.420803699
E07000074	2015	0.628311181	0.70053817	0.648493025	0.468696474	0.233486668	0.171343763	0.627243471	1.281201966	0.332850829	0.439554181	0.202572433	0.425767673	0.430906222	0.827496723	0.8791878	0.26908538	0.889397609	0.566923917	0.14365729	0.97627736	1.051613716	0.690913534	1.134751312	0.391429112	0.54428331	0.409283086	0.150363558	0.949499665	0.076475655	2.362787335	0.071909019	0.24963528	0.225686495	0.997372643	0.714349747	0.200701288	1.929645724	0.457464539	0.294623376	0.101921265	0.282853485	0.093000139	0.380509445	0.820620616	0.386809899	0.247554914	0.334236013	0.465795448
E07000075	2015	0.620051329	0.663634265	0.634576263	0.470254975	0.224668167	0.168417316	0.608319383	1.279247167	0.334227138	0.435655112	0.19945061	0.419709329	0.4142065	0.837273353	0.867889173	0.267420872	0.874711582	0.554615997	0.138844804	0.976025894	1.051529964	0.696281849	1.123397862	0.385094819	0.543320311	0.40530835	0.148787748	0.937350496	0.075093287	2.365484642	0.071861058	0.245945687	0.221862766	0.976228136	0.715121005	0.198431574	1.824096854	0.451728915	0.29145685	0.111999083	0.282771097	0.094260743	0.369367568	0.813742231	0.388534085	0.238233584	0.323736033	0.463017844
E07000076	2015	0.627903933	0.62316612	0.620471631	0.454478198	0.224418919	0.174374829	0.598251475	1.408982637	0.327139973	0.432993303	0.212758646	0.427789266	0.397748065	0.824434645	0.85540795	0.270991492	0.864586783	0.538135567	0.131977326	0.989640955	1.018778135	0.716747313	1.135118892	0.40347681	0.56117341	0.396432624	0.150552055	0.961506226	0.075337004	2.424201215	0.061810733	0.238930207	0.228208435	0.955287424	0.713959237	0.199818889	1.75583833	0.471617211	0.299300621	0.125425608	0.288376839	0.100142214	0.381448523	0.843155179	0.371417279	0.242086276	0.325093446	0.433186358
E07000077	2015	0.60218182	0.649037213	0.626608334	0.451683499	0.221759393	0.159534087	0.602525471	1.198870186	0.331741666	0.424963174	0.191943432	0.396952568	0.41197407	0.807985531	0.846589864	0.265601211	0.848621957	0.543154424	0.136766427	0.947737378	1.03409841	0.665302951	1.088558201	0.366246499	0.519963219	0.397197643	0.141273512	0.899377957	0.073860841	2.262169475	0.068797537	0.243466198	0.209215779	0.955097678	0.699306122	0.193842163	1.764029285	0.421702129	0.281041744	0.108192667	0.265905052	0.088722586	0.355731777	0.782329025	0.382202199	0.233045848	0.316031863	0.459184817
E07000078	2015	0.577783585	0.629480376	0.624587605	0.440501496	0.220954181	0.154185084	0.590663893	1.295928693	0.317815057	0.408099217	0.187948984	0.37480509	0.40550724	0.808204242	0.819643518	0.251144707	0.813089149	0.531980359	0.142520251	0.921711074	1.000233059	0.634229228	1.060519868	0.353936879	0.504933484	0.371456489	0.138103744	0.846494547	0.0806727	2.170268117	0.064493335	0.239021449	0.204471262	0.926177224	0.672279111	0.194425292	1.574217031	0.399127516	0.281983999	0.110306738	0.256479893	0.089470259	0.360618547	0.766154016	0.371023057	0.230289577	0.305956005	0.442384567
E07000079	2015	0.65810345	0.711891018	0.665288163	0.487447155	0.238108128	0.181393606	0.644206808	1.366068477	0.341213274	0.46098147	0.212277347	0.446722195	0.43761281	0.846181681	0.896918106	0.279802804	0.919830574	0.58739287	0.145730626	1.025273043	1.084951584	0.734619789	1.183973722	0.411749437	0.574689479	0.422103539	0.157420536	0.980942849	0.078871621	2.488899205	0.072660087	0.259033637	0.236482554	1.012878922	0.741642616	0.210163471	1.920576408	0.48297395	0.308634986	0.101845841	0.298520765	0.098861326	0.394451714	0.856148469	0.401949291	0.25362922	0.346684288	0.47580987
E07000080	2015	0.639135496	0.685405337	0.652961035	0.483186268	0.230624379	0.175976276	0.628312749	1.395040381	0.341032296	0.451804455	0.212160287	0.439180212	0.42504341	0.863297536	0.897014824	0.276232337	0.910174369	0.577196582	0.143401844	1.015926353	1.085470529	0.723590133	1.172199865	0.408074728	0.563357196	0.421759177	0.152632315	0.981188963	0.078277995	2.468004658	0.071380591	0.253561822	0.231309324	1.013643986	0.746877973	0.206318656	1.875798771	0.47462586	0.302899019	0.124402567	0.296240459	0.097626794	0.380688409	0.845470029	0.39809693	0.246625148	0.336680199	0.466994577
E07000081	2015	0.556359635	0.612362427	0.607621181	0.431112222	0.213075994	0.149282431	0.575895408	1.302013564	0.321180363	0.39908176	0.188168575	0.362803488	0.392673985	0.816333749	0.823196244	0.250982812	0.798170818	0.528167821	0.138961119	0.909112038	1.002714206	0.620915874	1.052667723	0.349414453	0.485049786	0.373376165	0.13155598	0.844196475	0.07655959	2.148427147	0.065528298	0.235650317	0.197908124	0.937957644	0.680815545	0.193619076	1.502203887	0.389013515	0.274829432	0.145021668	0.253787076	0.087673337	0.344264137	0.76391664	0.373623826	0.2237332	0.296867247	0.438030061
E07000082	2015	0.627623299	0.686865057	0.65166915	0.469950888	0.234861184	0.170838417	0.630317193	1.305173951	0.336234524	0.4413656	0.204140134	0.417682296	0.430563301	0.829524174	0.875554751	0.27461031	0.886693174	0.569551971	0.142936757	0.987556083	1.061564118	0.696748881	1.143257586	0.391258752	0.544498809	0.407263258	0.149338287	0.940961493	0.07816858	2.369898655	0.070156882	0.251946229	0.224879482	0.995588293	0.721885814	0.204248791	1.846566184	0.450931413	0.298726639	0.10930786	0.282879018	0.093917889	0.378432966	0.820450595	0.393539684	0.247186339	0.335871633	0.466988671
E07000083	2015	0.62647282	0.670622354	0.653424293	0.467592549	0.230496779	0.168904364	0.624811572	1.316445138	0.337266841	0.437324043	0.203505327	0.412875577	0.426972283	0.831884737	0.877951995	0.272639501	0.878413411	0.564640386	0.14035867	0.981882797	1.061579719	0.694402815	1.136271976	0.388710082	0.544445262	0.402667342	0.148484568	0.94242475	0.077807721	2.378107556	0.068434557	0.252393009	0.224707604	0.987590026	0.718309811	0.204734879	1.804961479	0.446067971	0.296928921	0.117682216	0.283329822	0.093942961	0.375995983	0.828440897	0.392823824	0.245600644	0.33069227	0.463316772
E07000084	2015	0.583113074	0.643135069	0.64785386	0.445830652	0.234983781	0.155501841	0.620335269	1.124311492	0.322429011	0.409654614	0.183193732	0.371805298	0.426762884	0.794528254	0.810065854	0.259657592	0.814348896	0.532703488	0.146575386	0.907475484	1.012128391	0.623035409	1.046723131	0.347280779	0.491102907	0.370483804	0.146316666	0.845041851	0.083033325	2.09240025	0.068536432	0.245875533	0.206244682	0.951990544	0.663822039	0.199858593	1.66937711	0.381845717	0.283253045	0.1209746	0.256707977	0.088029147	0.379647882	0.74702965	0.366635159	0.239865586	0.323379041	0.456961024
E07000085	2015	0.629528979	0.685296846	0.656375937	0.483003859	0.235104497	0.171219477	0.629757531	1.278352924	0.335918677	0.444016579	0.201216205	0.420862715	0.429062479	0.839385972	0.867019431	0.276861058	0.885648218	0.571573345	0.144929238	0.9823064	1.066474055	0.696854226	1.137056376	0.388085704	0.544960396	0.41120254	0.151826904	0.939298748	0.07953595	2.354771941	0.072065537	0.25112002	0.224017339	0.998190008	0.725840607	0.203019321	1.851136622	0.448468753	0.298767578	0.118453661	0.279991669	0.095022769	0.381816805	0.801787552	0.394926473	0.245867222	0.33596838	0.475067445
E07000086	2015	0.600246851	0.666747036	0.63675066	0.465074446	0.221833187	0.160229024	0.607325963	1.267225504	0.328732848	0.424466096	0.191315384	0.394697556	0.420035077	0.82430918	0.856534157	0.261643677	0.855232127	0.555338304	0.141698252	0.94556133	1.043335824	0.658434453	1.096084172	0.368599995	0.515876894	0.397580321	0.141896393	0.895749902	0.076425646	2.273034589	0.070291555	0.246893078	0.212604098	0.975143631	0.699418136	0.197816302	1.75442402	0.421893418	0.285549451	0.12289162	0.27073324	0.088344922	0.353353443	0.800263911	0.389687236	0.235580051	0.318922293	0.46094715
E07000087	2015	0.636528006	0.670483614	0.650609993	0.474862285	0.228201069	0.170680037	0.621343647	1.318671709	0.340341031	0.443201325	0.205337397	0.427064772	0.427819471	0.845987831	0.886573423	0.274259085	0.894913096	0.567635004	0.140690694	0.992327646	1.06899522	0.708365504	1.141755042	0.392739785	0.555933844	0.413961181	0.152858079	0.961303501	0.075314821	2.421200252	0.069464823	0.253079562	0.22690775	0.99004613	0.731187329	0.201368954	1.856220615	0.458840889	0.297435431	0.114031844	0.287960524	0.095093292	0.37465774	0.834642778	0.395928398	0.243078872	0.333391733	0.468765754
E07000088	2015	0.584437967	0.632174915	0.608725962	0.444501327	0.214496759	0.155861329	0.58018533	1.349998075	0.323207192	0.414219302	0.19490468	0.387100581	0.399359345	0.824281956	0.838962974	0.255114641	0.831828456	0.53526393	0.138104496	0.933656586	1.014286725	0.648568325	1.079525919	0.364386493	0.510819209	0.383536336	0.137765927	0.880410776	0.073723634	2.241150983	0.066484137	0.238764764	0.206089323	0.935340532	0.695637731	0.192480318	1.628972096	0.415353103	0.279257684	0.130781979	0.264443689	0.088818962	0.347153607	0.772488206	0.379888806	0.225731567	0.305623813	0.440553927
E07000089	2015	0.625046801	0.68271042	0.657340314	0.473468773	0.236201666	0.165523551	0.633250338	1.132813218	0.335016193	0.437591974	0.188153014	0.408159945	0.437464142	0.816859546	0.861518708	0.265937984	0.870342328	0.560241644	0.146449192	0.95847496	1.063496671	0.672260448	1.099129373	0.369132942	0.531925217	0.403493179	0.153011286	0.907984447	0.077364766	2.276485461	0.07665413	0.254084395	0.217048728	0.97803533	0.698125605	0.201022821	1.877803903	0.425112993	0.290664929	0.103671885	0.274736276	0.090389662	0.376956251	0.79339349	0.391880895	0.242740222	0.332529228	0.481868755
E07000090	2015	0.611343104	0.643799257	0.631774413	0.457839421	0.222533781	0.167114986	0.604672688	1.340036326	0.330414224	0.428043486	0.20309942	0.407071106	0.410304788	0.826855298	0.859526883	0.267575071	0.86380643	0.552176524	0.136694013	0.968643727	1.034760545	0.688148737	1.118980209	0.386526538	0.537896966	0.395721288	0.14436251	0.928733661	0.076243386	2.343939916	0.06566545	0.245493754	0.220548191	0.968627262	0.711485775	0.199234416	1.732009802	0.445005067	0.293526849	0.123267411	0.280256835	0.095027855	0.367468155	0.811355917	0.384305012	0.237562519	0.322706718	0.446306366
E07000091	2015	0.651852093	0.684862268	0.655835609	0.474395613	0.236350701	0.179492247	0.637155265	1.322368848	0.335473884	0.451161792	0.212495463	0.438423454	0.429709005	0.825217794	0.885116278	0.276692646	0.900168657	0.567437627	0.140158948	1.013329291	1.061851192	0.726526647	1.163910626	0.410639716	0.57046524	0.411514625	0.15309609	0.979659783	0.077482462	2.448459902	0.068753249	0.254014806	0.235261634	0.998562566	0.720188021	0.208548744	1.894325715	0.476609228	0.305992502	0.107353659	0.297313092	0.098219276	0.390661376	0.869429197	0.38883015	0.253736116	0.340925231	0.459559878
E07000092	2015	0.566700112	0.642034708	0.614471692	0.447507654	0.213818091	0.144596481	0.576294676	1.248850236	0.323264586	0.400722049	0.180534818	0.35882825	0.409842594	0.814192566	0.841954449	0.248085606	0.817352143	0.539265153	0.144885984	0.893752143	1.018848407	0.610363503	1.046860691	0.339902566	0.476072144	0.380276713	0.129709536	0.832594342	0.072471695	2.147969806	0.070124995	0.238599002	0.196583052	0.945645087	0.67809538	0.191885921	1.589967341	0.38333257	0.268900597	0.144614617	0.252174028	0.081859188	0.321833814	0.76580363	0.386657475	0.221573851	0.299832837	0.458188331
E07000093	2015	0.622820617	0.688510343	0.646880834	0.474658729	0.227018322	0.169960938	0.622035172	1.277516579	0.334265453	0.442654025	0.199822375	0.421911842	0.428601895	0.826276028	0.87361215	0.267055285	0.8924213	0.570334131	0.141946013	0.977213606	1.059923999	0.691011506	1.129372094	0.387001414	0.540519986	0.412679861	0.147548708	0.938552711	0.075974467	2.359870988	0.072365702	0.251024164	0.221029971	0.992406	0.718960038	0.200375419	1.865756344	0.449663833	0.292901061	0.113736898	0.284131813	0.092096994	0.364738251	0.805921683	0.39627577	0.239962156	0.32862729	0.469171519
E07000094	2015	0.634652451	0.685009246	0.657477927	0.476012056	0.2361165	0.167228428	0.633764096	1.220519926	0.332912598	0.436059723	0.193451398	0.413894509	0.44460303	0.815282539	0.870559814	0.269194359	0.875739678	0.563622031	0.142567582	0.954329856	1.06041894	0.674226238	1.106441684	0.375213181	0.541857211	0.403632606	0.153145676	0.911133568	0.07615806	2.318113027	0.071708492	0.254747419	0.223410163	0.984148341	0.699869582	0.203727606	1.919579034	0.430811312	0.294840272	0.113448023	0.27467531	0.089493986	0.378079291	0.833310748	0.392469287	0.246485029	0.338029925	0.476573017
E07000095	2015	0.567834932	0.622225431	0.620808754	0.434974972	0.228579213	0.151046605	0.597011019	1.073562929	0.319885121	0.39631499	0.182151684	0.360883317	0.415860001	0.772263905	0.783367298	0.2553418	0.779344771	0.514867598	0.144230369	0.884705639	0.983861709	0.608505792	1.020882028	0.341133557	0.479818428	0.358948282	0.140196565	0.829282743	0.075843626	2.059735169	0.067385731	0.237310561	0.199609053	0.933066887	0.644558951	0.197942678	1.634312358	0.374458866	0.274501579	0.112078835	0.255861284	0.086658009	0.36714997	0.750980918	0.358767108	0.240902126	0.312113388	0.450672754
E07000096	2015	0.576437655	0.63514185	0.63007514	0.44229565	0.22511506	0.153072733	0.603780075	1.13616573	0.319901298	0.405485356	0.18239943	0.366494408	0.413644127	0.782476167	0.805445273	0.256722717	0.80116823	0.526670785	0.139647581	0.903175429	0.999646407	0.621068697	1.041426136	0.346222989	0.490145291	0.366575355	0.140464759	0.83841235	0.077886618	2.108284629	0.066170086	0.239882745	0.201510767	0.932209308	0.659461898	0.195608317	1.655067466	0.382497885	0.276989044	0.113591727	0.253503966	0.085191486	0.362891599	0.746606097	0.367245842	0.236783083	0.313713336	0.448196646
E07000098	2015	0.556392229	0.600261869	0.612107629	0.421580517	0.22891767	0.151572655	0.589796002	1.139114879	0.313574445	0.400303834	0.183388819	0.350996261	0.390895739	0.788756471	0.780530319	0.254875109	0.781577657	0.510595936	0.140252192	0.905497713	0.979341568	0.617905995	1.026318965	0.34257631	0.479554849	0.353369388	0.134709745	0.80523055	0.085721698	2.030220243	0.066222783	0.236385626	0.199525303	0.914502177	0.658878897	0.193486263	1.46410235	0.374776686	0.279681583	0.128431463	0.247241579	0.091154332	0.365387225	0.697810841	0.350287784	0.229581438	0.308993645	0.430159222
E07000099	2015	0.593528492	0.64092747	0.632641115	0.451834068	0.225154288	0.15669284	0.601878029	1.169795683	0.323654537	0.416345221	0.18637747	0.382454257	0.415370218	0.801149423	0.825609122	0.256020679	0.825131545	0.533124847	0.140013622	0.924860188	1.021507143	0.642473278	1.059658198	0.355204145	0.510169472	0.377583027	0.146084838	0.8629734	0.077721345	2.186205053	0.068222861	0.243593015	0.207687085	0.93947263	0.676497716	0.196340156	1.712131785	0.402678057	0.280944964	0.114993071	0.261055532	0.088651068	0.364404794	0.762318261	0.374488864	0.234342117	0.314841583	0.455860782
E07000102	2015	0.581357843	0.636591601	0.630603156	0.445862875	0.230907339	0.157787244	0.610770194	1.128562145	0.321225996	0.410746239	0.183797618	0.372917406	0.412872071	0.788158431	0.802860743	0.25684094	0.806272041	0.529367169	0.143892924	0.914312536	1.010460803	0.634039968	1.048373237	0.35054537	0.493648805	0.37106606	0.142373975	0.834891267	0.081490135	2.107099228	0.07084264	0.243824192	0.206281604	0.940536186	0.663676993	0.199224973	1.633407269	0.38845746	0.284375265	0.118600906	0.259238863	0.089989524	0.370509578	0.740134843	0.366922563	0.238510416	0.319612649	0.453133595
E07000103	2015	0.522936825	0.584732178	0.610322068	0.395551548	0.231708222	0.140458027	0.601628965	0.98662418	0.303172329	0.372010978	0.162404359	0.317981396	0.40853864	0.728873831	0.742687514	0.24117052	0.719861573	0.479279713	0.139615235	0.819808162	0.938696978	0.546127497	0.941208382	0.300408322	0.429795904	0.319712702	0.138748907	0.714982416	0.086309039	1.779429165	0.063730395	0.232930405	0.185647402	0.869666781	0.59782401	0.193737139	1.397532483	0.308170571	0.266507971	0.125556769	0.223289927	0.080739273	0.385631839	0.689824991	0.330692971	0.227956643	0.310425258	0.422222924
E07000105	2015	0.582293841	0.631248629	0.620087234	0.441558487	0.220162775	0.157239835	0.591513214	1.219609626	0.325527814	0.415639543	0.189648245	0.382809064	0.400995356	0.808992832	0.828595015	0.261323182	0.821737199	0.530813002	0.139042332	0.931656528	1.015760253	0.6465225	1.073829969	0.361162285	0.503700126	0.379185066	0.13846929	0.871981238	0.079192367	2.189744995	0.067866287	0.23985829	0.206406603	0.938448655	0.687860144	0.194593859	1.625786154	0.404367736	0.281134362	0.12773933	0.265383805	0.090469644	0.356646286	0.755290354	0.373654417	0.230540415	0.311507822	0.447667383
E07000106	2015	0.593166264	0.624681037	0.614344876	0.452475867	0.221587487	0.160917387	0.585118783	1.331264373	0.320153088	0.418613774	0.193394142	0.395743629	0.396702183	0.820585476	0.81741092	0.263556358	0.826660986	0.534291953	0.142304006	0.933361296	0.998748454	0.656755034	1.079376825	0.364974549	0.522427722	0.382332734	0.141942612	0.871149935	0.07738224	2.233505971	0.064867014	0.236369738	0.211986406	0.92824744	0.69092532	0.192516461	1.655328306	0.420108779	0.284871094	0.116592442	0.263803045	0.092817807	0.362312317	0.773097822	0.372575389	0.229750894	0.314322548	0.443654818
E07000107	2015	0.569887657	0.628734215	0.614544049	0.443829613	0.207565634	0.148383617	0.574330681	1.179378321	0.318204657	0.404712837	0.180693107	0.360189948	0.403403422	0.793353919	0.818227877	0.247489638	0.812116054	0.531694809	0.13610346	0.895379767	0.997896677	0.617058418	1.034484154	0.339977419	0.488424161	0.375232213	0.13573467	0.834742138	0.073641455	2.141082119	0.065939558	0.237169012	0.194959161	0.915915429	0.666515446	0.187251162	1.635189419	0.389817687	0.271454984	0.114585443	0.25230044	0.083608499	0.330765345	0.739143414	0.378710586	0.219998641	0.301740423	0.449083443
E07000108	2015	0.608388431	0.652064222	0.63200418	0.449583446	0.22322521	0.165117128	0.601747792	1.345092266	0.326841059	0.424353225	0.200777247	0.40744604	0.408708002	0.823778737	0.857214815	0.263702677	0.856897954	0.54506171	0.139678845	0.96139078	1.024250209	0.679877366	1.116095707	0.384294229	0.531105821	0.393027013	0.142455859	0.926887462	0.075956763	2.327528201	0.065062826	0.242933943	0.216875331	0.961250297	0.700029257	0.197970952	1.749718044	0.442211766	0.290837688	0.113587739	0.275573318	0.093011955	0.366958127	0.817664849	0.378633204	0.237265364	0.32118457	0.445134361
E07000109	2015	0.535451959	0.576532254	0.601619309	0.408016445	0.227589484	0.148462057	0.584004162	1.159829578	0.310292931	0.389693699	0.182730493	0.343508114	0.379521778	0.792603705	0.758249567	0.250143074	0.750305557	0.495117585	0.140042819	0.889463228	0.96384397	0.600824391	1.005489485	0.33563656	0.466983759	0.339056043	0.135670119	0.789506481	0.089368655	1.964646108	0.064033893	0.232851239	0.198802437	0.912593909	0.650370598	0.19518339	1.394592631	0.355782725	0.279542967	0.142864015	0.242489931	0.093729719	0.376102857	0.685908362	0.340278858	0.231151595	0.305546507	0.423343364
E07000110	2015	0.588785243	0.644734499	0.637461661	0.457530531	0.229569604	0.160654774	0.611911585	1.230558293	0.322892673	0.417242193	0.189266895	0.38707416	0.416056583	0.809059729	0.82231439	0.262481001	0.829658753	0.544741987	0.14339122	0.928693837	1.022243931	0.645517384	1.075728982	0.362571481	0.503571871	0.38403058	0.143114269	0.869259384	0.081305884	2.178099092	0.069212366	0.244804172	0.211145852	0.958370703	0.68595755	0.199038631	1.666260205	0.408457169	0.287758072	0.126816152	0.26484447	0.091711698	0.369361804	0.766477441	0.37666709	0.238199046	0.32096682	0.454949106
E07000111	2015	0.619576687	0.655545567	0.634805657	0.47002498	0.225247533	0.166612682	0.608665185	1.276310213	0.332810672	0.436910725	0.197886643	0.408442474	0.414646484	0.833798526	0.859115586	0.267651206	0.869795817	0.555641542	0.140230622	0.973224342	1.052038216	0.685007828	1.112082971	0.38070076	0.537568673	0.402977082	0.148823336	0.919148969	0.077242607	2.331189906	0.07043311	0.247212448	0.217229101	0.9640828	0.716639652	0.199243994	1.770364828	0.440694386	0.291970259	0.124859301	0.277114619	0.094252283	0.367350675	0.787851068	0.387042616	0.23700703	0.323613025	0.462735867
E07000112	2015	0.603498803	0.653097382	0.637169485	0.457269483	0.230828406	0.166679866	0.609523146	1.324504393	0.322748819	0.423968286	0.198660644	0.404252712	0.411460336	0.822319505	0.837395341	0.26333352	0.844315884	0.545814982	0.142713509	0.954381235	1.018370062	0.673615178	1.105466298	0.38134589	0.526410265	0.386389983	0.145821986	0.910671542	0.080003494	2.285097211	0.067299263	0.24211751	0.21884923	0.96431421	0.695359505	0.200407458	1.738538691	0.436615898	0.293916224	0.118873633	0.273888303	0.094779278	0.381202926	0.798993535	0.373294131	0.241792037	0.324194341	0.446982102
E07000113	2015	0.583749101	0.634329998	0.610430233	0.445188539	0.216982398	0.158023412	0.58313232	1.291990876	0.323452252	0.417314902	0.193638368	0.384399326	0.397130919	0.823469843	0.831196475	0.25922611	0.832546088	0.536434583	0.138065232	0.938013062	1.017031046	0.649458776	1.083014391	0.366784623	0.509146288	0.384947995	0.138944643	0.882552339	0.076433514	2.235022651	0.067344907	0.238472778	0.206833121	0.941720684	0.699938642	0.192074153	1.633780551	0.417376475	0.28120461	0.12881235	0.263540358	0.090816392	0.349875212	0.74697387	0.380969543	0.226693107	0.307164619	0.443595996
E07000114	2015	0.588925254	0.616682988	0.608181032	0.436301048	0.217632821	0.161591393	0.582816166	1.39903138	0.324645856	0.419598496	0.201911001	0.39902758	0.385670514	0.828269484	0.838891655	0.262057215	0.827631853	0.529356634	0.136473922	0.959438748	1.007103058	0.673017574	1.102265506	0.381147798	0.527983744	0.381150748	0.138011711	0.899853041	0.077796311	2.295588425	0.064655635	0.235259965	0.211848827	0.941065907	0.701016882	0.195747847	1.606507093	0.432279404	0.286822843	0.130170831	0.269450529	0.095163255	0.360093693	0.790577563	0.3732927	0.232124449	0.305608504	0.431555864
E07000115	2015	0.612592581	0.658836954	0.641914144	0.463234224	0.229327051	0.161809151	0.617448807	1.172609276	0.332341981	0.427076462	0.189002952	0.398904628	0.426391571	0.816879985	0.848612293	0.264840807	0.852258221	0.547500032	0.143127776	0.942566434	1.043106046	0.664061558	1.08370298	0.365409432	0.524900359	0.394052183	0.149686797	0.896955809	0.07679803	2.249882808	0.072923486	0.248461687	0.213944421	0.968078208	0.692393106	0.197900997	1.819517663	0.417936497	0.287583651	0.114312838	0.269020085	0.090518031	0.370495199	0.792565066	0.38671198	0.237997349	0.32516959	0.468304787
E07000116	2015	0.594623489	0.646611773	0.631080781	0.458365569	0.224193649	0.158891782	0.604454128	1.23909892	0.324166138	0.419772944	0.188353406	0.391621475	0.411226893	0.824845287	0.825796475	0.26028096	0.837491377	0.540925372	0.142879639	0.936964564	1.02689153	0.655147353	1.077008229	0.361174509	0.515009342	0.390851137	0.145606945	0.871116966	0.079907977	2.225898646	0.068822652	0.243898168	0.208269017	0.950342723	0.690287916	0.196565671	1.724393127	0.413719408	0.283097225	0.120398435	0.266245106	0.090705954	0.364617365	0.768940723	0.377889981	0.234684689	0.318251631	0.458528371
E07000117	2015	0.535017119	0.586022988	0.577853311	0.405438912	0.201864979	0.14505337	0.546350344	1.312271122	0.30406186	0.383090798	0.182255679	0.360614552	0.364690648	0.788321026	0.78329004	0.241327118	0.76781476	0.496371415	0.132425133	0.877496507	0.943021918	0.608158969	1.016870319	0.342805719	0.471088007	0.355393435	0.125503991	0.821160005	0.073863075	2.09023673	0.061369783	0.221944385	0.191788597	0.884679687	0.649961557	0.182194274	1.473383637	0.382912699	0.262206724	0.124287279	0.245817954	0.085278181	0.328364282	0.73364647	0.350999314	0.212625681	0.284351476	0.410181279
E07000118	2015	0.58229955	0.636854811	0.611126926	0.442115939	0.210693055	0.157453154	0.579663906	1.325691776	0.321373958	0.416313409	0.193118168	0.395733241	0.397755163	0.81863011	0.842308972	0.254092749	0.845620317	0.540522009	0.136617573	0.935943519	1.01370207	0.6564353	1.084137872	0.368860723	0.510641947	0.393886099	0.136517944	0.897317027	0.072359891	2.268105013	0.067057292	0.237416522	0.207391893	0.945966052	0.698616372	0.1896294	1.685383459	0.426136487	0.277518101	0.118927585	0.268597296	0.088631488	0.337269423	0.771077089	0.381503873	0.223952939	0.305751912	0.441461905
E07000119	2015	0.626259745	0.664203293	0.639930137	0.468828044	0.226548007	0.172421084	0.613440963	1.372844002	0.329750247	0.435377701	0.205036979	0.42831708	0.415747146	0.820842235	0.863246459	0.267986765	0.872849037	0.553830624	0.138016515	0.984118806	1.036551364	0.708647342	1.136945572	0.396166033	0.559785633	0.400170379	0.152822999	0.957753255	0.07593771	2.417383105	0.065621833	0.244012389	0.227498681	0.968887739	0.711579044	0.201519669	1.847615191	0.46254549	0.296192744	0.104387315	0.287443024	0.095531744	0.38189578	0.839032786	0.381603629	0.244228149	0.32734992	0.45145498
E07000120	2015	0.525939833	0.579299933	0.581773108	0.403068004	0.208447447	0.145708329	0.552553342	1.264531012	0.303601532	0.384079771	0.181584084	0.349032549	0.364808466	0.789641581	0.769143635	0.242010812	0.75462342	0.497394658	0.13478385	0.876370061	0.946254216	0.596716119	1.00746691	0.339133363	0.461729072	0.348426026	0.12886522	0.804864694	0.079635971	2.024413405	0.063150903	0.223914885	0.192329283	0.891026563	0.651968786	0.184275675	1.406823229	0.374320513	0.268525497	0.132923325	0.244011476	0.087912147	0.345547053	0.695196533	0.345864484	0.217826343	0.286511791	0.411471905
E07000121	2015	0.570875983	0.60311401	0.599032792	0.433784818	0.2092359	0.154989343	0.567979833	1.372853263	0.317082246	0.404458342	0.193059979	0.384202256	0.381403538	0.818226649	0.813912578	0.252572746	0.810690627	0.522425621	0.134788181	0.925868757	0.989130005	0.649383033	1.065329965	0.362890786	0.507833892	0.375152983	0.138102484	0.868376563	0.076589594	2.230667093	0.062425239	0.230681658	0.2074373	0.920153977	0.688318995	0.189676364	1.573123002	0.41234165	0.278316643	0.126443182	0.262094661	0.091387486	0.347499147	0.776019426	0.367557705	0.22362713	0.29850562	0.427373782
E07000122	2015	0.520097858	0.564602191	0.582893486	0.395473911	0.214293328	0.143077166	0.556345197	1.226738185	0.297081564	0.374571719	0.178019737	0.339823312	0.364546887	0.760418154	0.749515905	0.240409849	0.729002647	0.481923149	0.133670481	0.854544579	0.919421098	0.580556479	0.983202359	0.330243545	0.451050793	0.334631759	0.126267881	0.779441153	0.080706034	1.948513012	0.061121265	0.22275251	0.189670703	0.875362832	0.626610906	0.185319719	1.35353677	0.359061574	0.266412846	0.139243158	0.235457912	0.088103084	0.35856909	0.690343727	0.331918738	0.219405812	0.288535537	0.401681114
E07000123	2015	0.494936372	0.547424747	0.562637055	0.393730497	0.206347796	0.13687315	0.540751035	1.260966456	0.29370148	0.365690724	0.169777578	0.328287881	0.348307591	0.776441487	0.721752156	0.232305314	0.708431316	0.473875803	0.13561735	0.836355723	0.911183368	0.564744277	0.958499363	0.315579079	0.438088618	0.325716533	0.122757349	0.738565335	0.085802161	1.875433463	0.060627702	0.216737127	0.18543967	0.857765612	0.626175514	0.180763736	1.255194843	0.335914599	0.262178683	0.140311554	0.225411612	0.0862943	0.336837388	0.668560518	0.332999004	0.211243374	0.275674982	0.395606618
E07000124	2015	0.622589604	0.681281693	0.64071808	0.463686656	0.228637322	0.167711412	0.618768996	1.262279411	0.331989156	0.433234424	0.198204529	0.413120952	0.426554662	0.810457327	0.872330393	0.268294382	0.87523842	0.560230923	0.141173333	0.967323668	1.040551956	0.683764026	1.120572508	0.384791827	0.535649642	0.403459118	0.14643285	0.932392988	0.074799783	2.335923131	0.069368549	0.24715914	0.223706054	0.983024608	0.705038573	0.198702878	1.878916885	0.447600503	0.290930913	0.100776195	0.277939378	0.090591202	0.36823294	0.818883332	0.386314509	0.241645602	0.330310272	0.460894154
E07000125	2015	0.56287947	0.624261279	0.591221507	0.424024573	0.204079545	0.149791974	0.557989366	1.292555814	0.315526458	0.402321094	0.18684166	0.37898472	0.381483186	0.815243142	0.829983524	0.246210262	0.809363521	0.52356951	0.137103713	0.910839746	0.990581318	0.632636602	1.059616751	0.356988268	0.491540146	0.381000274	0.132233152	0.8560112	0.073119385	2.19784547	0.067022782	0.230841592	0.196613764	0.914927755	0.677210505	0.18492043	1.599547544	0.40746505	0.269797455	0.120672912	0.257517175	0.086658042	0.32545074	0.755879769	0.373885724	0.217289482	0.295535712	0.431107449
E07000126	2015	0.590285665	0.635015156	0.613441868	0.442947176	0.212486006	0.156375969	0.582315131	1.320595332	0.324843031	0.411972715	0.191682429	0.39005568	0.399831433	0.813741054	0.852058459	0.256153443	0.84132074	0.537670626	0.135134727	0.935218117	1.012221334	0.656219497	1.082189098	0.366729631	0.509044297	0.392788621	0.136794242	0.902405252	0.072379645	2.271214648	0.065326401	0.238664041	0.208017808	0.948151079	0.692935887	0.190917579	1.697593978	0.424830287	0.278363176	0.112369137	0.26756282	0.087654808	0.340045338	0.802275852	0.379757764	0.227434309	0.308015472	0.441758401
E07000127	2015	0.591686357	0.622623937	0.604549173	0.443392271	0.208114912	0.159491105	0.572150888	1.365528974	0.328925707	0.417687022	0.199025547	0.402764354	0.38717097	0.840154528	0.844558811	0.261140696	0.849220774	0.536835317	0.134751262	0.953568665	1.013946456	0.676939166	1.096993838	0.375947914	0.525053409	0.396948498	0.142089688	0.910314333	0.073770873	2.330114276	0.06466744	0.234396206	0.212203657	0.933532932	0.715068182	0.188001035	1.667353783	0.437687533	0.28153128	0.116982472	0.274157268	0.092542077	0.343412282	0.78728005	0.379595608	0.223286597	0.305589903	0.439506626
E07000128	2015	0.611526752	0.640216409	0.623816999	0.446700284	0.219045713	0.171269805	0.60273878	1.347084557	0.326351963	0.430140868	0.207893119	0.416564073	0.402214794	0.807005626	0.851617082	0.263817239	0.862053442	0.546124143	0.131734685	0.983854576	1.02320617	0.703534426	1.126990292	0.396146122	0.548728908	0.397643209	0.146632139	0.942511649	0.074151432	2.374961074	0.065334545	0.243093011	0.223991079	0.948649307	0.705980089	0.198695499	1.754664842	0.458017675	0.295532524	0.100667185	0.288830047	0.095933331	0.371560281	0.827336501	0.374291495	0.239495221	0.32234961	0.436047175
E07000129	2015	0.592314867	0.631918611	0.645296721	0.448322133	0.230489496	0.159810992	0.607630299	1.191768625	0.323015464	0.416514173	0.190380236	0.388746691	0.412148694	0.803395127	0.828839928	0.268180089	0.824360093	0.533339024	0.140473482	0.929055965	1.01387964	0.650365556	1.07216612	0.362294508	0.50636204	0.379128596	0.145292767	0.881033677	0.079624283	2.185597593	0.065528523	0.243170181	0.210537028	0.948944671	0.683859121	0.198582666	1.685200285	0.40583415	0.285353923	0.124551044	0.263395115	0.091613491	0.374952483	0.769683688	0.368327835	0.239471145	0.321459107	0.452940192
E07000130	2015	0.563375872	0.603191788	0.609729221	0.424813912	0.221224087	0.1533759	0.582485628	1.239252565	0.313235307	0.398849475	0.187666104	0.369328668	0.393169437	0.800672927	0.79743511	0.254259228	0.795388566	0.518018434	0.138410002	0.904328448	0.981255103	0.62684739	1.04270955	0.35047696	0.488171631	0.365663188	0.136397041	0.837248659	0.079120032	2.11153306	0.063912073	0.235884053	0.204230996	0.924858924	0.666191756	0.191684769	1.542328243	0.390428566	0.279553928	0.120021467	0.255810184	0.089922412	0.361459191	0.746257778	0.357654884	0.227329	0.307621928	0.429405485
E07000131	2015	0.616314483	0.660869721	0.633956955	0.457740119	0.222127218	0.165920242	0.607506728	1.246395231	0.33386604	0.430834871	0.197070032	0.408347	0.417836087	0.823350442	0.864256772	0.266322253	0.870324232	0.553725363	0.138683571	0.968032546	1.051495027	0.683784907	1.110369041	0.378343656	0.534900687	0.408730959	0.146263567	0.922537392	0.073912776	2.328239093	0.069889712	0.247950979	0.217005086	0.966178839	0.711919904	0.196061189	1.816838828	0.441768424	0.288889426	0.109562369	0.279303964	0.091480918	0.360432249	0.807978887	0.38537208	0.235138203	0.325720837	0.458133389
E07000132	2015	0.606415289	0.660632381	0.627090325	0.463061188	0.219230512	0.1634279	0.597761802	1.336661617	0.327241457	0.426056292	0.196594693	0.410826709	0.410441845	0.829583629	0.857208645	0.264957298	0.865207005	0.55269406	0.139082608	0.954506616	1.033719139	0.676195925	1.111207734	0.37866561	0.526606416	0.400541909	0.143676493	0.923218482	0.075840099	2.332151747	0.067732591	0.242659003	0.216412374	0.966758528	0.711614937	0.195337768	1.7683188	0.44287347	0.286216503	0.116297517	0.277434692	0.091095198	0.354666886	0.800506403	0.386775689	0.233103501	0.317978221	0.454271161
E07000133	2015	0.595632105	0.649537358	0.617835555	0.446168293	0.214619325	0.161743527	0.593009479	1.370465718	0.330348934	0.423020295	0.201430448	0.402900068	0.398980659	0.829864564	0.866686128	0.259413373	0.859148352	0.549884417	0.137061947	0.971448423	1.039257103	0.674927796	1.115624175	0.382889865	0.52578908	0.402883475	0.138670138	0.923406108	0.073730082	2.331846838	0.068670414	0.244058903	0.212566908	0.962903049	0.713890437	0.195713514	1.684200032	0.440217267	0.284645413	0.114985215	0.278138481	0.090419595	0.350211042	0.80796615	0.383053191	0.232855185	0.311177538	0.443247242
E07000134	2015	0.584069106	0.641324086	0.626963928	0.435145044	0.223504192	0.157164335	0.601922787	1.247615527	0.323944381	0.411154862	0.193449587	0.383660016	0.406917227	0.804197438	0.839633204	0.259295251	0.825592443	0.534410606	0.139863357	0.937069785	1.016184141	0.647814888	1.07997003	0.365295882	0.503494956	0.382409605	0.13808427	0.885697116	0.075876783	2.209243662	0.067190344	0.242207211	0.208679061	0.95515553	0.683620455	0.197131301	1.667321677	0.408990255	0.282165175	0.117433392	0.264060563	0.088578118	0.359374432	0.795547464	0.371375793	0.236172056	0.312579522	0.441578527
E07000135	2015	0.552065927	0.591971118	0.631251977	0.409767295	0.248831074	0.157490956	0.61761471	1.141029949	0.312590405	0.394709215	0.190884262	0.353452261	0.395094387	0.784757314	0.763843965	0.261708309	0.755547685	0.505370456	0.14484681	0.910214337	0.974891722	0.624506428	1.042003068	0.351653947	0.475150799	0.342740253	0.139001256	0.817452852	0.093295674	1.978534415	0.064379769	0.23903473	0.209589837	0.946296827	0.653516429	0.204925481	1.412715092	0.373089621	0.294222222	0.131069398	0.252715574	0.100332134	0.413913847	0.732743433	0.337305723	0.249129001	0.319566733	0.427545477
E07000136	2015	0.570759882	0.606579226	0.583950759	0.439588399	0.197247538	0.155509463	0.553624837	1.434528505	0.324687029	0.412754982	0.200713508	0.391670815	0.367332656	0.833888016	0.838435182	0.252416742	0.832879371	0.525697968	0.129800659	0.951449334	0.998889403	0.670313192	1.090986882	0.375722531	0.513672181	0.386114052	0.133489819	0.900985806	0.069688805	2.312447099	0.065156952	0.229068393	0.204853621	0.918114438	0.703869875	0.187171223	1.559982026	0.433213271	0.276384715	0.123755909	0.273310319	0.09075721	0.329561238	0.781662191	0.376655832	0.218885745	0.290415255	0.423444568
E07000137	2015	0.634484798	0.653996217	0.636647836	0.462197068	0.227983625	0.178502878	0.614603489	1.410123317	0.330483849	0.439943662	0.215671248	0.443980132	0.408322939	0.835689049	0.872917898	0.274911792	0.890363758	0.557451167	0.136913213	1.002231013	1.03817809	0.730582184	1.15998298	0.412755221	0.562363	0.410568598	0.155291307	0.981856153	0.076440908	2.461270192	0.066053101	0.244446446	0.233295485	0.978670404	0.727042593	0.202304457	1.834792498	0.485754074	0.304973797	0.112176012	0.29830052	0.1005442	0.385597138	0.85272674	0.37887712	0.245344502	0.334873196	0.442459323
E07000138	2015	0.530797551	0.580139227	0.567230382	0.423058285	0.192069302	0.142724823	0.529141381	1.451548407	0.306751183	0.387517074	0.181718436	0.365582972	0.358700379	0.828574487	0.788249572	0.236067528	0.781492177	0.510697194	0.137084339	0.883255885	0.955223058	0.60855295	1.023761659	0.341579795	0.476269076	0.365777919	0.124246414	0.810216656	0.07502683	2.137350911	0.061371702	0.218689543	0.192245054	0.883613789	0.676469231	0.179654984	1.424038225	0.386010374	0.26279881	0.139389364	0.245298318	0.086001043	0.306954556	0.743551857	0.368872112	0.204083701	0.27175699	0.416018971
E07000139	2015	0.617566693	0.660406685	0.633717021	0.462652367	0.219539038	0.168353021	0.607735525	1.326757407	0.335099587	0.434824795	0.203734308	0.420153729	0.412174858	0.8369521	0.873658388	0.267133024	0.879032428	0.559687098	0.138162596	0.98165389	1.05039191	0.699251254	1.133288687	0.390802242	0.542745101	0.41024969	0.146751564	0.945513016	0.074854302	2.388739619	0.069512542	0.24684354	0.220396831	0.981383173	0.721087529	0.198502138	1.80725216	0.455475732	0.292564602	0.110201684	0.286633499	0.094006122	0.363122547	0.82826242	0.391045479	0.238020523	0.322573931	0.456594922
E07000140	2015	0.608363164	0.647408212	0.621891305	0.451650784	0.216264712	0.165712558	0.596475811	1.353325699	0.325852317	0.423542927	0.201101849	0.415055438	0.402397233	0.809427501	0.857806745	0.261412061	0.858656803	0.544944446	0.134699039	0.960115093	1.017077432	0.687361988	1.115929736	0.386483565	0.53264939	0.399284704	0.141709946	0.927458316	0.072458931	2.353307917	0.066951715	0.241302323	0.218991726	0.952796741	0.699010342	0.196335218	1.754608886	0.449082112	0.289002449	0.105448953	0.280679577	0.09234638	0.353456101	0.845283333	0.383000841	0.233721439	0.316587466	0.440338109
E07000141	2015	0.600342714	0.64492231	0.619086079	0.446757878	0.216438327	0.163450932	0.591795851	1.36394596	0.330986551	0.424493709	0.200014618	0.409300363	0.399736814	0.830769178	0.860518305	0.263513511	0.85763055	0.548106176	0.137174787	0.962797905	1.029573555	0.681059795	1.110261162	0.382049355	0.527902581	0.400349635	0.142589414	0.921832898	0.075315783	2.330121283	0.067919706	0.241850031	0.215157887	0.952487133	0.714397605	0.194296981	1.694725725	0.442125324	0.285775067	0.116643022	0.275806525	0.0928467	0.354186317	0.804080595	0.383592701	0.231731222	0.311691371	0.444709567
E07000142	2015	0.621090865	0.665215876	0.637755582	0.461111476	0.224664943	0.168943848	0.610459036	1.345835175	0.333236526	0.432564907	0.203534015	0.422274096	0.41527646	0.834698998	0.874707391	0.267893027	0.876444882	0.55716378	0.139381762	0.976331062	1.046699927	0.695333546	1.13230736	0.392649132	0.540972267	0.405630918	0.147755188	0.954038748	0.075606303	2.384328685	0.069488043	0.246598436	0.223884574	0.982245882	0.719149824	0.199263917	1.831307574	0.455428068	0.292532875	0.110997795	0.284224552	0.093656331	0.368468345	0.833016572	0.387736306	0.240865401	0.323934569	0.453760498
E07000143	2015	0.595994658	0.62564473	0.601763248	0.446204663	0.211810933	0.161224032	0.582033739	1.395492257	0.327303625	0.421730016	0.2038439	0.407196284	0.387653803	0.827925169	0.865735551	0.260719511	0.848015066	0.53554439	0.133180755	0.968823874	1.025095397	0.684853781	1.113341528	0.387013165	0.528129387	0.398120128	0.138128313	0.926810866	0.071617032	2.346778547	0.066901275	0.238066798	0.215900407	0.948909712	0.706593891	0.195200258	1.657722427	0.446854285	0.284685636	0.129202541	0.278710342	0.092524351	0.347798844	0.83137609	0.379759011	0.231501268	0.305826428	0.432244537
E07000144	2015	0.619910472	0.657745787	0.63640839	0.458294201	0.222807872	0.171541536	0.612711931	1.35272325	0.334609314	0.441319795	0.209306263	0.424200943	0.410317602	0.829070266	0.871685998	0.269172394	0.881334756	0.553329479	0.136179035	0.99774456	1.052387181	0.710308281	1.142243137	0.400335184	0.552789105	0.408016573	0.145388244	0.959861754	0.075592214	2.405847106	0.068031052	0.248060309	0.224021504	0.977993686	0.722598124	0.201981941	1.788356752	0.46103825	0.296046953	0.108117721	0.29093891	0.095485414	0.368145494	0.837991503	0.387199762	0.2417239	0.325248717	0.452080059
E07000145	2015	0.576399767	0.608867478	0.588205003	0.430798551	0.209209791	0.158318817	0.566995209	1.401424319	0.318748609	0.412300253	0.200671281	0.401193101	0.375384593	0.819546677	0.838051292	0.252817102	0.824242814	0.519133299	0.132183526	0.950501953	0.995365833	0.665832418	1.089770013	0.378739084	0.518210755	0.382943033	0.133884192	0.903097355	0.071730172	2.285955657	0.065912525	0.231250564	0.210558359	0.92364469	0.692746889	0.190527472	1.595332701	0.432540122	0.278934542	0.119160612	0.271302875	0.092057539	0.344546532	0.800588527	0.368574156	0.225808123	0.296834604	0.421281805
E07000146	2015	0.59800069	0.628259379	0.615168913	0.4480246	0.216832514	0.167127515	0.592385329	1.360148847	0.323667338	0.42675995	0.205120594	0.414561672	0.392456946	0.816124573	0.841431571	0.262043921	0.852601624	0.538594349	0.132750243	0.968552632	1.012676007	0.690165662	1.111581203	0.3910864	0.534110493	0.392756277	0.14281036	0.932196063	0.074592806	2.334934333	0.065856232	0.238094201	0.219417364	0.948238778	0.702386162	0.196303681	1.703715637	0.448967096	0.289725028	0.115943365	0.284167257	0.095790155	0.364218879	0.804594471	0.372986289	0.235025292	0.313633123	0.433963037
E07000147	2015	0.649147817	0.661272404	0.639092077	0.467780432	0.232674914	0.184333709	0.624721483	1.415007181	0.330503249	0.450780721	0.220534545	0.454110272	0.409948188	0.827582596	0.871567277	0.277797182	0.895017475	0.557801653	0.136212394	1.022905054	1.039766769	0.747116242	1.176201131	0.423934946	0.580082835	0.408136898	0.156900091	0.998956689	0.07692943	2.495024334	0.065183691	0.246000612	0.238712092	0.981685691	0.722079677	0.207187689	1.866458795	0.498030698	0.310886609	0.105551058	0.307369512	0.103206861	0.399492923	0.873452608	0.375674038	0.252424454	0.341294663	0.44208169
E07000148	2015	0.519139525	0.573010316	0.573403749	0.416493445	0.196551157	0.138687855	0.535681239	1.337929072	0.296074571	0.371731001	0.173787424	0.345620309	0.367960045	0.780768669	0.755819987	0.228540814	0.735842513	0.492679558	0.135758753	0.846796763	0.927103159	0.576362818	0.982149261	0.321595365	0.460995029	0.341741435	0.124559142	0.771580019	0.075124221	2.016399613	0.058832042	0.216823417	0.184326371	0.852216494	0.628179669	0.180724391	1.390807515	0.360336693	0.257663686	0.118665148	0.235404409	0.082073286	0.319698012	0.725004603	0.351287918	0.208400088	0.273207388	0.411696054
E07000149	2015	0.619938354	0.654563057	0.63185079	0.461589118	0.222061149	0.170351388	0.607644743	1.323909909	0.330797834	0.436785108	0.2034762	0.422053017	0.408564101	0.826654845	0.856491526	0.268096333	0.872744335	0.55358363	0.13713056	0.979774409	1.037044753	0.699051227	1.125106924	0.391115845	0.542745121	0.40373861	0.14817376	0.943028612	0.075913712	2.365985429	0.068264318	0.244635005	0.221142906	0.967072547	0.714638902	0.198708447	1.780513072	0.455471071	0.293658957	0.113043517	0.285960857	0.09516379	0.370109617	0.812778723	0.383317837	0.238875212	0.322745992	0.452538975
E07000150	2015	0.538734812	0.598510454	0.572319845	0.425142413	0.190227777	0.142167626	0.537915893	1.322268087	0.314746968	0.393925476	0.184004651	0.356106159	0.368397692	0.805773033	0.811448218	0.23653309	0.796632521	0.520656304	0.130712947	0.892184493	0.972471045	0.61462714	1.029805665	0.343799378	0.476511105	0.372355466	0.12666625	0.830570463	0.067769568	2.15378839	0.066580094	0.22539711	0.19046143	0.890757558	0.675449776	0.178606879	1.500346961	0.391607651	0.261405451	0.127843123	0.250491902	0.083108262	0.304994957	0.717685515	0.375586491	0.206137066	0.274434795	0.422129192
E07000151	2015	0.609083809	0.663200284	0.633762866	0.461224572	0.220467791	0.163590984	0.602299525	1.302938005	0.330336434	0.426320893	0.196073399	0.410018193	0.412759315	0.834705998	0.863804726	0.267015887	0.869993064	0.559425437	0.140335163	0.956252681	1.04478399	0.678893408	1.113598323	0.378802033	0.527281269	0.410090332	0.144842608	0.922756249	0.076651375	2.326620583	0.068317612	0.244879696	0.214968439	0.979353077	0.716848992	0.195062719	1.776144679	0.441013603	0.287326771	0.120303077	0.276682144	0.091529325	0.354512584	0.80220606	0.388804139	0.231982413	0.322256819	0.45920313
E07000152	2015	0.605255943	0.658199282	0.635629186	0.468647035	0.219710683	0.162242827	0.599029772	1.303815965	0.326697116	0.426061474	0.193267231	0.396751426	0.414906153	0.82293675	0.85089248	0.26152252	0.863684212	0.552913298	0.140267127	0.945888304	1.041137011	0.663268589	1.098020561	0.371231197	0.515754636	0.396054846	0.142760069	0.911287175	0.075978692	2.29141455	0.067802307	0.243207776	0.21248114	0.967364052	0.708436427	0.195216926	1.75927742	0.429241332	0.284671868	0.128119506	0.271045362	0.089093597	0.351312118	0.773321549	0.386375061	0.230779749	0.318128956	0.459356434
E07000153	2015	0.568076973	0.623015213	0.599488711	0.435340672	0.212971507	0.151478188	0.569726932	1.260484586	0.317568883	0.402586249	0.189709618	0.373298816	0.392906548	0.80884712	0.827100233	0.252326334	0.811161415	0.525994183	0.138170318	0.915456213	1.003567882	0.630521666	1.05670461	0.357141234	0.493674467	0.377415193	0.132467314	0.862632524	0.070998953	2.186372566	0.066710585	0.233444824	0.19898714	0.930309606	0.680841473	0.190488905	1.580162634	0.40387805	0.272014229	0.131383694	0.254434598	0.086887785	0.335239434	0.748068664	0.375126736	0.22270568	0.299011583	0.438318103
E07000154	2015	0.528905274	0.588875117	0.578003421	0.423086188	0.203024524	0.140818708	0.543277634	1.254799846	0.303555708	0.381076614	0.176235891	0.347392067	0.374652705	0.786279132	0.769756701	0.2379704	0.756738574	0.502093523	0.13879188	0.857471055	0.950379218	0.584537049	0.994814419	0.329001887	0.459884074	0.35547171	0.125129468	0.795964315	0.073153744	2.033836983	0.063668719	0.222178141	0.18490196	0.883500206	0.645596777	0.182700024	1.42873712	0.36722096	0.258162863	0.134902894	0.243305868	0.083324293	0.322063695	0.704797514	0.357589701	0.211879089	0.280570827	0.425925225
E07000155	2015	0.616190868	0.676151419	0.637028383	0.464426086	0.225736858	0.165406488	0.611730489	1.240091116	0.33205252	0.435641211	0.195259932	0.41044464	0.421657882	0.827849582	0.862382486	0.265161282	0.874068759	0.559580008	0.143024005	0.964365467	1.05392792	0.676936596	1.109957522	0.377317195	0.530231305	0.40860336	0.149062496	0.917044569	0.075731823	2.310013026	0.072800262	0.250000407	0.216091804	0.973303851	0.71397889	0.197037668	1.812986839	0.438063568	0.287700716	0.111710536	0.278503529	0.091130199	0.365337385	0.784012365	0.388002248	0.236784027	0.325316022	0.465001169
E07000156	2015	0.562810033	0.622733491	0.611703538	0.427405786	0.219239287	0.153758003	0.582886739	1.224456745	0.311163834	0.40063562	0.185427363	0.370182205	0.391142594	0.791944025	0.798606996	0.250750076	0.794037146	0.517686503	0.138775702	0.905794029	0.985963057	0.621841887	1.04398239	0.352848819	0.484343967	0.364965862	0.135967073	0.84647526	0.078511728	2.115693972	0.067160719	0.2350987	0.201922291	0.922413275	0.664125064	0.191640287	1.548272904	0.393666057	0.27654096	0.121163068	0.255957274	0.088350538	0.354303583	0.732990592	0.360014403	0.228738249	0.302933033	0.430442448
E07000163	2015	0.61445252	0.68240106	0.622982556	0.450411729	0.223462464	0.172306339	0.609909703	1.354644011	0.326191837	0.435963394	0.203545406	0.423089675	0.408214914	0.807385411	0.857596758	0.263094903	0.872526913	0.557998864	0.138561995	0.981214492	1.019760662	0.698647584	1.136837376	0.39939992	0.541583077	0.404059524	0.142877579	0.941414978	0.074849472	2.362267165	0.06937336	0.243041431	0.22236702	0.967319944	0.704089412	0.198882127	1.800674119	0.464234995	0.292881611	0.089624452	0.285281449	0.093427756	0.372261467	0.821115602	0.380836459	0.239979066	0.322888939	0.446764021
E07000164	2015	0.611324134	0.662776634	0.624522802	0.45344274	0.221890098	0.168025422	0.606028027	1.326993899	0.330121412	0.43091529	0.201690497	0.420263725	0.407495888	0.816473164	0.863832721	0.265543708	0.866992827	0.551362188	0.138433693	0.975716012	1.029881454	0.694904882	1.125843744	0.392756369	0.536566828	0.401401032	0.144451414	0.945556276	0.073884112	2.357891979	0.070930689	0.242703034	0.222933724	0.971131533	0.707714537	0.198425913	1.786661198	0.454991977	0.290164135	0.101986876	0.283064284	0.09247601	0.368293716	0.825076541	0.381316966	0.240614992	0.318542285	0.44660195
E07000165	2015	0.594005305	0.64967969	0.624489515	0.448732755	0.21979843	0.162763014	0.600473181	1.255951082	0.323450175	0.423827925	0.194345394	0.398398975	0.405177938	0.797597048	0.836124803	0.258447044	0.845700625	0.543662829	0.137736683	0.953116931	1.018606773	0.669293638	1.093273625	0.37522278	0.520832253	0.393703503	0.140148675	0.901008057	0.075933667	2.267224488	0.067340171	0.241476729	0.212321474	0.955103722	0.690195567	0.196097216	1.716615986	0.428880066	0.284029279	0.104833978	0.274060632	0.090422319	0.357403957	0.792177036	0.376235599	0.234685872	0.313520054	0.445895349
E07000166	2015	0.579485887	0.622580272	0.599313074	0.436035479	0.209942724	0.156321668	0.575538985	1.288430249	0.321211466	0.410780876	0.195513784	0.390535161	0.390581604	0.80250927	0.831209812	0.252794739	0.82623397	0.528213825	0.133861225	0.933693529	1.001271886	0.653263032	1.075094263	0.36870826	0.506982808	0.384442656	0.137123531	0.90099391	0.069833703	2.247584741	0.066981342	0.234335339	0.208671126	0.937727221	0.686340521	0.189980891	1.671211933	0.424322062	0.276937954	0.118905738	0.268267098	0.087470479	0.348565969	0.779187405	0.368760207	0.226585918	0.306577489	0.431028952
E07000167	2015	0.624455398	0.671004657	0.635282914	0.465632165	0.226779661	0.174903249	0.61414237	1.366140881	0.325911594	0.438348478	0.205232704	0.433382927	0.409073045	0.818684785	0.852915302	0.269052812	0.877678641	0.558878431	0.139491507	0.98443379	1.031865371	0.711535734	1.139710276	0.400260526	0.551433977	0.405645466	0.151010528	0.951806339	0.077254351	2.400381073	0.068497875	0.245348212	0.228642482	0.972396352	0.712677107	0.201641437	1.820040722	0.468750482	0.297995614	0.10380449	0.291162546	0.095720026	0.380151135	0.83071882	0.38151273	0.243050064	0.327928145	0.448166125
E07000168	2015	0.600371486	0.653817768	0.615100418	0.447536018	0.223276783	0.168164802	0.598862976	1.353978244	0.315174596	0.422618622	0.200668138	0.408644321	0.402870806	0.795942011	0.834721588	0.256745228	0.843359105	0.543838538	0.13743991	0.954442812	1.003923839	0.676025242	1.103064855	0.388280782	0.529841337	0.384158525	0.142511949	0.911521633	0.07566567	2.302801996	0.066076329	0.238795768	0.222218492	0.948804581	0.687529262	0.19750507	1.728724517	0.444343923	0.290619803	0.106797866	0.277268813	0.093359489	0.371366967	0.80170908	0.367960402	0.239131649	0.319617004	0.430934234
E07000169	2015	0.590528871	0.643628484	0.612483137	0.450721007	0.211310015	0.156149353	0.579951892	1.287458165	0.325219422	0.415728238	0.192501655	0.392305756	0.400763957	0.817368472	0.855818964	0.25668419	0.851316393	0.539284324	0.135485926	0.939573569	1.024558122	0.660098213	1.08879162	0.369288871	0.513102606	0.395436951	0.136833494	0.913350423	0.071462096	2.290763061	0.065681718	0.238285583	0.207975486	0.951994891	0.6990415	0.190237345	1.738764167	0.42604446	0.276315187	0.116402165	0.27118301	0.086619713	0.333762347	0.790553413	0.382465194	0.224200199	0.307544271	0.444411276
E07000170	2015	0.568737561	0.625512296	0.596063391	0.43618911	0.200581663	0.152996751	0.563446512	1.393884009	0.325811461	0.409589125	0.195080171	0.387952488	0.382870117	0.829721416	0.849313404	0.25086877	0.836841185	0.539005637	0.13322461	0.935066434	1.008958386	0.653981793	1.086235347	0.368488948	0.506300678	0.391211748	0.133531255	0.889593708	0.071431675	2.28754491	0.066808907	0.232791254	0.204162541	0.934889289	0.704862695	0.186749592	1.623034691	0.424794609	0.274241416	0.118392973	0.266816118	0.088079397	0.32475217	0.783622549	0.385477031	0.218669176	0.292718273	0.434537317
E07000171	2015	0.591343587	0.63402423	0.610989682	0.444652224	0.210003769	0.161880122	0.579865111	1.400264869	0.329988025	0.421604553	0.201290172	0.405250968	0.391872071	0.842936159	0.852857735	0.261304735	0.857533517	0.546267879	0.135938943	0.960936952	1.023216696	0.681091507	1.110391555	0.380541793	0.527205826	0.40012179	0.142166568	0.917171439	0.073875426	2.344749455	0.066241176	0.23909409	0.213838196	0.945971517	0.721218499	0.190540321	1.692610339	0.440776685	0.284881494	0.117759265	0.277671816	0.093155131	0.347254476	0.788258781	0.383599179	0.225624878	0.309891544	0.439760848
E07000172	2015	0.582997796	0.625759221	0.62784253	0.439260323	0.223191336	0.1583347	0.595835191	1.267193018	0.319035603	0.409966199	0.192149136	0.386674942	0.405631107	0.804351721	0.821245363	0.258973632	0.82128797	0.528058493	0.137950916	0.928753036	1.002101972	0.648741547	1.068502447	0.36241781	0.510204552	0.376295462	0.142019296	0.87651257	0.078944263	2.200237619	0.063547184	0.239074685	0.210453126	0.935097697	0.679588045	0.194946142	1.655034217	0.41017653	0.284678532	0.113754755	0.263538601	0.091492084	0.367798835	0.775884649	0.366462813	0.232982587	0.315929785	0.441528491
E07000173	2015	0.588045553	0.631451442	0.621980854	0.447223115	0.221398359	0.161932021	0.592438419	1.281201199	0.321546059	0.41608642	0.197150137	0.392533943	0.401991615	0.824832751	0.824599564	0.25710966	0.831255704	0.541014385	0.143859614	0.941317547	1.013911521	0.660629166	1.08599494	0.373830893	0.515165263	0.387696437	0.141685078	0.890224384	0.077572439	2.250021164	0.067623939	0.239927059	0.211918669	0.952315315	0.693326534	0.19744101	1.656954824	0.422895478	0.285922051	0.119167527	0.275593893	0.095108305	0.362788684	0.774379954	0.375032782	0.23376853	0.313146709	0.448379753
E07000174	2015	0.557704241	0.611439408	0.596646825	0.423816358	0.206972241	0.150835028	0.569872952	1.372795027	0.321901011	0.399972246	0.192569977	0.377315786	0.381254381	0.813338119	0.831287226	0.248165876	0.807398556	0.52330861	0.134484821	0.923327668	0.992385779	0.640058597	1.068452095	0.361823658	0.494958645	0.376848631	0.130715746	0.869897795	0.074022471	2.207435935	0.066205974	0.233539004	0.203831769	0.929234458	0.685584964	0.190471343	1.532995193	0.405811659	0.27492721	0.120912141	0.259581269	0.088621796	0.340975436	0.789440164	0.372822213	0.223899606	0.290996661	0.425202777
E07000175	2015	0.591497918	0.63548694	0.613575762	0.443250044	0.213267825	0.162551627	0.586621722	1.363791607	0.3276078	0.423874646	0.200523552	0.407257924	0.393147385	0.826801681	0.848252251	0.259501492	0.852301931	0.542420509	0.136836146	0.961559109	1.02083136	0.679324846	1.107809245	0.381989457	0.526787372	0.397879554	0.140182305	0.916606936	0.07506265	2.326156559	0.067476844	0.238028498	0.213786028	0.953896561	0.711019012	0.192940622	1.69193552	0.439948683	0.284758962	0.112563557	0.277985968	0.092801941	0.350020123	0.794535118	0.382499468	0.229415044	0.308457834	0.443748507
E07000176	2015	0.614944757	0.658611196	0.639750121	0.455337058	0.228294273	0.162481966	0.613581426	1.181714592	0.330243376	0.423277342	0.190384848	0.401618573	0.421912711	0.807523584	0.84719952	0.263533552	0.850925542	0.541415733	0.140415537	0.94203413	1.032840053	0.665967253	1.086236268	0.367357887	0.526358554	0.392089474	0.146215402	0.8955459	0.075586191	2.261681488	0.069362582	0.24655071	0.213717734	0.958950757	0.685479973	0.196992505	1.805107936	0.421793204	0.286274297	0.102895838	0.26939032	0.089156742	0.367176483	0.806473471	0.380022923	0.237962855	0.325336309	0.461646598
E07000177	2015	0.590412147	0.647789959	0.631488201	0.454178659	0.217803647	0.155529581	0.59751613	1.245175052	0.32710808	0.417516052	0.188147512	0.384420407	0.412430939	0.814073029	0.846989163	0.257048563	0.841200496	0.545080208	0.139963292	0.934236095	1.031168148	0.646044137	1.076422183	0.360132313	0.508333803	0.391021553	0.139737697	0.87813215	0.075554398	2.225773737	0.06851059	0.24474516	0.205523021	0.946446195	0.689699476	0.195447925	1.679831046	0.408726384	0.280308782	0.12485705	0.265642768	0.087022073	0.348273887	0.781760738	0.382850211	0.229770009	0.311622797	0.456407175
E07000178	2015	0.527599622	0.58016678	0.608169359	0.420256273	0.225596055	0.138945224	0.577222566	1.153455088	0.294416382	0.367399675	0.165579384	0.326291436	0.407000235	0.750468538	0.742031915	0.233885682	0.725599134	0.490812335	0.143506208	0.812521686	0.933347262	0.545139585	0.945938629	0.303683795	0.43296731	0.329375046	0.131211312	0.730001694	0.081882315	1.854968892	0.058752904	0.226052625	0.184860015	0.889612058	0.605966595	0.190572524	1.343214637	0.322562181	0.263676401	0.13423747	0.229330081	0.078849673	0.355592703	0.717328218	0.34285809	0.221879129	0.297678319	0.425877273
E07000179	2015	0.622073869	0.676871617	0.659818097	0.471857285	0.235052855	0.165698299	0.634538346	1.187676219	0.333370111	0.434121818	0.194026809	0.407102092	0.436078248	0.810231446	0.858327073	0.267864964	0.866486156	0.559708693	0.143239485	0.95737139	1.050672908	0.673869415	1.104932074	0.373691112	0.530585188	0.399428745	0.149243862	0.907695291	0.078484746	2.278603109	0.070282917	0.252985888	0.219778723	0.981237155	0.694866692	0.2034969	1.850414117	0.423591306	0.292530715	0.113726779	0.27554842	0.090504754	0.377294377	0.818819561	0.385234579	0.247219375	0.332471691	0.470339482
E07000180	2015	0.616489141	0.665405669	0.644477791	0.46535275	0.225755624	0.163509747	0.615403341	1.226149669	0.331572034	0.430213544	0.194492547	0.402335119	0.424086503	0.814801039	0.858208854	0.264310019	0.861717395	0.553984709	0.140760895	0.956662703	1.048672196	0.671687098	1.100043399	0.372554959	0.528319404	0.397200857	0.147086155	0.910832959	0.075636238	2.296098037	0.06903862	0.249025099	0.215365447	0.96694931	0.697340968	0.199281818	1.796016126	0.429171145	0.28838032	0.110646363	0.275228392	0.08963402	0.364330825	0.802972474	0.385766242	0.239318974	0.326431011	0.46348978
E07000181	2015	0.622986896	0.689192831	0.649382791	0.474715779	0.227554396	0.165075135	0.618866424	1.256415019	0.333030695	0.434957294	0.195682647	0.408146566	0.431801037	0.817441391	0.874596353	0.264995644	0.879590129	0.566571154	0.143000601	0.964517283	1.057239853	0.677124611	1.117423813	0.378658688	0.532782205	0.401727336	0.145810854	0.916963247	0.075524857	2.327178275	0.070642732	0.251481079	0.220653845	0.974979818	0.706518706	0.201107197	1.824503456	0.435470024	0.290757897	0.115291151	0.277425586	0.089207884	0.361691179	0.807157321	0.393663343	0.24076294	0.327657407	0.468723965
E07000187	2015	0.62574862	0.675510096	0.640269035	0.465504318	0.227194972	0.170344574	0.615774853	1.373330054	0.336963717	0.442463924	0.204918035	0.423780186	0.415762	0.843686106	0.877182333	0.26912634	0.883259419	0.5632232	0.143557028	0.994715501	1.059469728	0.702182837	1.145374358	0.395903377	0.547803116	0.411247968	0.14592514	0.947193161	0.077485567	2.398275267	0.070365334	0.248755516	0.222388183	0.983468091	0.726526427	0.201745769	1.796883535	0.45583236	0.295252307	0.113203061	0.284394561	0.094441968	0.368562621	0.828055208	0.393276479	0.241987922	0.324081981	0.461098254
E07000188	2015	0.610187106	0.658462007	0.627728596	0.45451695	0.219341881	0.165986016	0.602887212	1.376398808	0.336510146	0.430548456	0.205446403	0.41731603	0.406108612	0.837170693	0.873977483	0.266381522	0.866198499	0.552425347	0.13796872	0.979369679	1.045954121	0.694484844	1.134624857	0.390931047	0.540150581	0.401089473	0.142219774	0.943155027	0.074989955	2.38046043	0.068293878	0.243284818	0.220847021	0.975262157	0.718132777	0.198895097	1.770939399	0.449516914	0.289757867	0.115076024	0.28428243	0.0929629	0.359900636	0.833311019	0.388295631	0.239194093	0.315886422	0.44849506
E07000189	2015	0.622018408	0.674045448	0.637905256	0.467665543	0.225925471	0.171498559	0.61554088	1.382537282	0.334059687	0.438575546	0.206797519	0.424379191	0.413597443	0.836988058	0.877425136	0.270092371	0.882463341	0.56255393	0.140502774	0.990947228	1.050162535	0.703907565	1.148016676	0.398638426	0.544816505	0.406097095	0.145020886	0.955432471	0.077105799	2.40102667	0.069303103	0.245979271	0.225439104	0.991225326	0.720329469	0.203067263	1.810111518	0.461352101	0.296394157	0.117918042	0.289687797	0.094810605	0.372170602	0.840384279	0.387958032	0.24401692	0.32527813	0.455917827
E07000190	2015	0.620188437	0.668530105	0.639289718	0.466220528	0.226172673	0.168636052	0.610251517	1.357139925	0.333557591	0.434523822	0.20393136	0.407174462	0.415384033	0.841830852	0.874305375	0.267351065	0.872057977	0.562351007	0.143011714	0.984435191	1.055530374	0.689584356	1.133566759	0.391044569	0.538179717	0.403555304	0.142803341	0.941447072	0.076126412	2.374755091	0.069611925	0.24719582	0.221403794	0.99104526	0.716542331	0.203015008	1.756588066	0.450385947	0.294608816	0.118809552	0.279939357	0.094480021	0.364845557	0.82872229	0.392976826	0.241721805	0.32287323	0.457307349
E07000191	2015	0.676196232	0.733997214	0.670749167	0.485120721	0.251103578	0.193958057	0.664900969	1.378044737	0.33000607	0.469500544	0.223588747	0.473838885	0.442680625	0.828137044	0.885626397	0.28476983	0.931858408	0.588272369	0.145363242	1.042740735	1.060880284	0.755071829	1.20204447	0.437886736	0.588323416	0.412979671	0.164544882	1.019512345	0.081628228	2.524525189	0.070314368	0.256212852	0.252090479	1.020444705	0.724706897	0.216775716	2.021974815	0.512266572	0.323253721	0.101237511	0.309628491	0.103961761	0.426354002	0.897411626	0.38006191	0.267453019	0.361820533	0.462110685
E07000192	2015	0.565270437	0.617908515	0.599614293	0.43507949	0.203597062	0.151558593	0.56463507	1.353895298	0.323158735	0.40451843	0.191060377	0.381706055	0.386057251	0.82649424	0.835472904	0.252814314	0.82417624	0.533075949	0.134256195	0.924390041	1.009611312	0.644861239	1.07216945	0.359603335	0.49872137	0.387257392	0.133203651	0.876936412	0.072752052	2.243136376	0.06521802	0.234201186	0.203321441	0.931967407	0.698504661	0.187373779	1.597688269	0.411736638	0.273347381	0.125777095	0.263441641	0.087347803	0.329233005	0.770148189	0.380219215	0.218680868	0.295526038	0.434052872
E07000193	2015	0.54948612	0.60815007	0.58207293	0.420617604	0.201191744	0.14936997	0.555774106	1.29462024	0.314448345	0.39701096	0.185928994	0.374846728	0.375638511	0.792934967	0.809527979	0.245434951	0.796163111	0.515983132	0.131100237	0.904511754	0.97649876	0.62837016	1.043431873	0.351432691	0.489725055	0.371995682	0.130050935	0.846569963	0.072624771	2.156854155	0.065081232	0.228415686	0.197434403	0.896562633	0.671304111	0.183654071	1.538921696	0.399743597	0.268086158	0.114104657	0.256835475	0.085871575	0.333335116	0.751022501	0.362938419	0.217081814	0.289942318	0.424406969
E07000194	2015	0.608203989	0.650331336	0.640817445	0.460870802	0.225295263	0.164483578	0.611837094	1.237497684	0.328889356	0.426008153	0.196831225	0.409430557	0.41860053	0.808317564	0.851642444	0.263603689	0.857907408	0.545504939	0.13620388	0.953641022	1.030236628	0.676510505	1.096346228	0.377191197	0.530345926	0.396739571	0.148834788	0.925073582	0.076289011	2.292387058	0.067040503	0.245005108	0.219243984	0.966987037	0.696798838	0.19728299	1.828273713	0.434368933	0.288628206	0.109855859	0.278597886	0.09221478	0.371440746	0.806048128	0.376331828	0.239627536	0.325170763	0.454147019
E07000195	2015	0.579395535	0.620028266	0.604476953	0.436933175	0.209131821	0.156683008	0.572510646	1.378544001	0.321926975	0.408782275	0.196169917	0.39129389	0.389784329	0.824381147	0.843362636	0.254832006	0.828356419	0.5331525	0.135731073	0.936740495	1.006398444	0.656835006	1.084285955	0.369098824	0.51144598	0.385311631	0.137444061	0.892503415	0.072809535	2.27783626	0.064520265	0.234251056	0.208614793	0.939226338	0.697003216	0.190618278	1.623978335	0.42590533	0.278828455	0.122713199	0.264579884	0.0896132	0.341470968	0.800404654	0.375581263	0.224883064	0.301508679	0.431570879
E07000196	2015	0.609971926	0.654247428	0.635224677	0.468565015	0.225132564	0.169164916	0.604722998	1.301414965	0.330816488	0.428581759	0.201758549	0.417100091	0.414039351	0.828952863	0.849257021	0.267344026	0.869280246	0.557984235	0.142654482	0.961868921	1.03500469	0.694510477	1.122979352	0.387629411	0.532073591	0.404118119	0.14847396	0.933499319	0.076884503	2.339821332	0.069136873	0.24423325	0.223683886	0.975953936	0.715229655	0.198189241	1.780098353	0.450782302	0.293633965	0.111836624	0.287039299	0.09594692	0.371311642	0.805316038	0.384774414	0.238462296	0.326610486	0.455237456
E07000197	2015	0.583869109	0.6248961	0.621886179	0.436252782	0.220445262	0.15914095	0.593643802	1.289635572	0.321960419	0.410938036	0.19491333	0.392832947	0.39926153	0.804483191	0.824423918	0.260688457	0.823351962	0.528690675	0.13664983	0.935174219	1.003302802	0.658898723	1.078921234	0.367749942	0.51348474	0.380964811	0.141754039	0.885966315	0.077504723	2.226719354	0.064375891	0.238508048	0.211144419	0.938146169	0.685507431	0.194451991	1.661185768	0.416239809	0.284127492	0.112108578	0.269155363	0.091867109	0.364012692	0.784060836	0.36727307	0.233071021	0.313432698	0.437439268
E07000198	2015	0.610054309	0.659622305	0.627239685	0.457163337	0.219111408	0.167547689	0.60051235	1.355979588	0.328650505	0.426011922	0.202763744	0.414497105	0.407443404	0.824782289	0.860247309	0.264054671	0.86779716	0.552715941	0.137593072	0.965892249	1.034524226	0.689062609	1.124633945	0.387226364	0.532395459	0.400215871	0.144020509	0.936618066	0.07322963	2.365428515	0.06686021	0.243439502	0.221932566	0.966376964	0.710556108	0.196912802	1.777001125	0.452641891	0.289082138	0.110250185	0.28291304	0.092194655	0.359878934	0.812574405	0.382775354	0.236652457	0.322882848	0.442746823
E07000199	2015	0.561222047	0.620849182	0.588354225	0.434883784	0.199509309	0.150325732	0.553866345	1.339958094	0.316663764	0.401917972	0.185626453	0.37647686	0.382136396	0.815985357	0.830059665	0.247597154	0.818651372	0.527919989	0.134415852	0.907486778	0.99366807	0.630781323	1.054086858	0.354796191	0.486984866	0.385801702	0.129321473	0.860751939	0.070701422	2.203494191	0.066859729	0.230823773	0.196532261	0.908549195	0.689391558	0.18255774	1.574487428	0.41026517	0.267221658	0.126158371	0.255720862	0.085053125	0.315578567	0.752437694	0.375509936	0.211607404	0.291883926	0.43229978
E07000200	2015	0.623123295	0.66548272	0.634469601	0.462645586	0.227216277	0.172636304	0.615280578	1.323623598	0.329205494	0.440792949	0.205711561	0.429627211	0.413581976	0.825939009	0.864059846	0.269498177	0.880386354	0.557171111	0.140652042	0.986484812	1.044832152	0.702875821	1.137390352	0.396830391	0.544212279	0.408907859	0.147904303	0.947949767	0.076527178	2.37761049	0.069641768	0.247040196	0.224986038	0.980174147	0.718660029	0.2005805	1.806930698	0.461860036	0.296941869	0.112642377	0.289408871	0.095811551	0.373542498	0.8174178	0.385505981	0.241502829	0.327768567	0.454887095
E07000201	2015	0.535184948	0.584648294	0.573478233	0.424992112	0.20226731	0.144826181	0.545760087	1.329855902	0.30502469	0.385903662	0.180388296	0.36879247	0.363939695	0.788709371	0.786610536	0.241907748	0.768730995	0.503160679	0.131413079	0.878042882	0.948259929	0.60241637	1.013060333	0.33933961	0.469497765	0.358191456	0.125687061	0.823710775	0.073606218	2.081883918	0.062317585	0.223366299	0.19092745	0.882394781	0.653394616	0.183350277	1.439390513	0.384851353	0.262797678	0.139234504	0.248027933	0.085123927	0.33289414	0.739027793	0.354721748	0.213636896	0.279779835	0.414569856
E07000202	2015	0.525297327	0.577482661	0.573968497	0.415139746	0.200649601	0.141632687	0.542974743	1.282940541	0.306424052	0.384572078	0.181817026	0.348277593	0.368218995	0.788916162	0.771911348	0.241173934	0.757058339	0.495524135	0.133155893	0.877828551	0.954604019	0.594908883	1.007500038	0.334613377	0.47154719	0.353087549	0.125601946	0.802690063	0.074057699	2.058412257	0.061461475	0.220975099	0.186342249	0.878978732	0.652594548	0.184083452	1.41697556	0.369330464	0.261816658	0.131234492	0.24226626	0.085719571	0.324471237	0.712628447	0.358327156	0.212776771	0.277837547	0.42184303
E07000203	2015	0.61531522	0.649797089	0.622791405	0.456092731	0.219157631	0.167801158	0.599555103	1.350429481	0.332282551	0.434013996	0.204823132	0.421755141	0.403182858	0.83391054	0.861484236	0.267461804	0.875908633	0.552187793	0.137702425	0.979407135	1.038611461	0.699243699	1.129673135	0.391473553	0.541159456	0.408815967	0.146229314	0.941852232	0.07380708	2.376783289	0.069546644	0.244202713	0.220885592	0.965484702	0.721666161	0.196506908	1.763844599	0.456582976	0.291713393	0.116698519	0.28484635	0.094712059	0.363545849	0.812506044	0.384971786	0.23478799	0.319612222	0.450956515
E07000204	2015	0.598301319	0.636061276	0.620692648	0.45533152	0.217336021	0.160269285	0.591417395	1.299538568	0.324316753	0.419188589	0.19509131	0.400791523	0.405117399	0.826558798	0.853466137	0.26039149	0.845654365	0.539908911	0.136751126	0.949853836	1.033353402	0.667521902	1.0941428	0.373858966	0.523786819	0.395813168	0.14264562	0.907891117	0.074017569	2.297698932	0.0663801	0.239998619	0.212286341	0.953380826	0.699783783	0.195269615	1.717111636	0.430159596	0.283958897	0.131576524	0.272593317	0.091144549	0.3505787	0.80857388	0.379377278	0.230900804	0.314460926	0.44725131
E07000205	2015	0.63655289	0.664700125	0.643106702	0.472113624	0.231560276	0.175377584	0.622513838	1.323096517	0.334844271	0.444059884	0.207118765	0.429862893	0.420399593	0.829173595	0.867545033	0.274913119	0.885068269	0.558495337	0.13906147	0.99484763	1.054875743	0.713148271	1.140698318	0.399598789	0.558531451	0.408568717	0.154534286	0.965455338	0.076884849	2.414083093	0.067838602	0.249433737	0.228387987	0.983138051	0.722939098	0.203602063	1.869929039	0.467770485	0.300872513	0.118471075	0.290408123	0.097734024	0.389062205	0.834520417	0.382263944	0.246518334	0.335152813	0.459241678
E07000206	2015	0.60642429	0.632766931	0.612727415	0.447309416	0.21904931	0.168101312	0.59349736	1.360694088	0.323006842	0.428131722	0.206234054	0.414217114	0.394813393	0.813449152	0.853469525	0.263364087	0.855599519	0.538674138	0.133157514	0.973449165	1.018413894	0.693102167	1.119672928	0.393314415	0.538220553	0.39341495	0.139675213	0.936965022	0.073430349	2.356448198	0.065396993	0.238687639	0.221280827	0.954794942	0.702669127	0.198237687	1.710080734	0.454308268	0.290864714	0.119987678	0.283227478	0.095084881	0.362275729	0.816348822	0.37485904	0.236895191	0.315297097	0.433423687
E07000207	2015	0.604177374	0.647491558	0.645614595	0.454075442	0.234650382	0.159503622	0.622795187	1.075279783	0.328206208	0.424860393	0.183511976	0.380562572	0.423856262	0.79002217	0.817094312	0.263131027	0.824823965	0.535992458	0.143938279	0.933526428	1.029066386	0.645865051	1.058698611	0.352599825	0.513614847	0.378855557	0.147294307	0.851398475	0.081304368	2.154813994	0.071252092	0.249258389	0.206219934	0.939200173	0.671457988	0.200215628	1.725718336	0.392573644	0.284875922	0.109808928	0.259495385	0.089882902	0.377076671	0.745772302	0.37298745	0.241435524	0.327553711	0.468836329
E07000208	2015	0.596953504	0.634137346	0.643771357	0.446963889	0.238468346	0.157933335	0.618318158	1.097322778	0.328392954	0.418833886	0.187750556	0.372712876	0.423559124	0.796411342	0.818615099	0.265457594	0.820196505	0.53260483	0.144250147	0.928823928	1.025993753	0.639522406	1.05887432	0.352479289	0.503803188	0.370251751	0.147149005	0.85072992	0.081727125	2.134430537	0.068955224	0.249037299	0.21011895	0.952312753	0.675361424	0.202243115	1.670439559	0.392173786	0.287566687	0.121984878	0.259494865	0.090975528	0.381973277	0.752304472	0.365760448	0.241799032	0.329215433	0.458753266
E07000209	2015	0.581050201	0.620419565	0.638947026	0.449305375	0.232255561	0.157994587	0.614535341	1.201548528	0.319585321	0.411927488	0.184894468	0.376866152	0.413832354	0.813381306	0.794336146	0.259023998	0.808440774	0.530716386	0.146732077	0.916863748	1.008362695	0.637222918	1.046622258	0.349371631	0.50101945	0.370121085	0.147628535	0.835594455	0.087913935	2.108176746	0.06702534	0.243647423	0.209119232	0.942434299	0.67514465	0.198936437	1.615718032	0.387205564	0.287790827	0.127474801	0.25658077	0.093417289	0.378095708	0.742985142	0.363693372	0.236763583	0.325583181	0.451937021
E07000210	2015	0.644429241	0.675059368	0.661242886	0.480418833	0.238246504	0.17272616	0.636314209	1.250372017	0.340761553	0.445305241	0.201651637	0.425402217	0.434631038	0.841989338	0.879185479	0.274727776	0.889317088	0.565615415	0.143661322	0.99596128	1.081413165	0.710589243	1.13864863	0.390981272	0.563671411	0.409694061	0.158267527	0.952522085	0.07879823	2.406627234	0.072035831	0.254945763	0.228365129	0.997599386	0.725960606	0.206695086	1.895140871	0.452458421	0.303093474	0.115585151	0.285928913	0.097286963	0.389693617	0.836032391	0.395019345	0.24812057	0.340942732	0.477686974
E07000211	2015	0.597162417	0.653465036	0.650098682	0.458820632	0.237638958	0.159998348	0.626175621	1.116638037	0.323405156	0.419248453	0.184799048	0.379431443	0.431061373	0.793892809	0.822291202	0.261838959	0.829905292	0.543603224	0.144696295	0.923361838	1.03170823	0.638392411	1.059929358	0.35370117	0.506162885	0.376473629	0.149641782	0.853300534	0.082296672	2.143877829	0.070576045	0.250192102	0.209944584	0.956367513	0.673711505	0.202290013	1.711044601	0.395219669	0.289340702	0.121789797	0.260671336	0.089506735	0.378427219	0.751892311	0.374285338	0.24224704	0.329985639	0.462568157
E07000212	2015	0.593396232	0.628788731	0.638321697	0.453423543	0.229765825	0.158593964	0.605181995	1.222319483	0.321177718	0.413908668	0.190761508	0.377071854	0.417724384	0.812793378	0.809715759	0.261183539	0.818364596	0.538499669	0.145258314	0.924177759	1.01250003	0.639827188	1.062420458	0.354546143	0.506046971	0.376736846	0.144440632	0.856162832	0.081897551	2.174652176	0.064750893	0.244101717	0.209497942	0.952415775	0.680238485	0.200415065	1.634868985	0.396168201	0.287332036	0.128838785	0.263020669	0.092289658	0.368988978	0.775839511	0.369204118	0.235800528	0.320990154	0.455127032
E07000213	2015	0.596849585	0.636949313	0.655878172	0.442653077	0.239385472	0.158295285	0.636742176	1.101999893	0.32324205	0.412519712	0.187766954	0.36929979	0.439827658	0.778862965	0.811055281	0.266013722	0.812725871	0.530352144	0.142902996	0.916872004	1.014256593	0.631724292	1.048360201	0.348082764	0.510495512	0.364027276	0.153034981	0.846764861	0.083299128	2.109579892	0.06464176	0.250920273	0.211416706	0.946939388	0.657652711	0.204772481	1.727688963	0.378664228	0.28845392	0.112343671	0.257360319	0.090130709	0.397106382	0.776994639	0.363168099	0.247408027	0.33522044	0.456758292
E07000214	2015	0.609830483	0.659993715	0.648189515	0.453807707	0.230706143	0.162406948	0.623870438	1.141158598	0.332912879	0.428081986	0.189183902	0.393790575	0.427223697	0.807802603	0.846157073	0.264730058	0.849547398	0.545926816	0.142997993	0.950602829	1.042411345	0.664132576	1.087125644	0.365762613	0.522579572	0.393138455	0.145821372	0.887229704	0.079623833	2.229062225	0.070536197	0.24986744	0.211216964	0.958895211	0.687179305	0.19865314	1.777310931	0.413681153	0.289918486	0.099735924	0.271880371	0.090904905	0.372133586	0.78112408	0.380947235	0.238408091	0.329728993	0.468263959
E07000215	2015	0.623203832	0.673697848	0.651399933	0.465197492	0.241100585	0.164822705	0.633493212	1.173321308	0.333871381	0.43364332	0.19393976	0.400161669	0.44020925	0.799212129	0.841887906	0.276075244	0.862546711	0.547367843	0.144322528	0.957665016	1.047713643	0.671972369	1.106207304	0.370566574	0.534574839	0.386803571	0.14937957	0.903523212	0.079633456	2.255399897	0.069086708	0.249402751	0.218407723	0.963847225	0.696780715	0.202341415	1.812149338	0.418644334	0.292693804	0.108296842	0.268646452	0.090706833	0.378087836	0.779016563	0.386527007	0.246753654	0.33918151	0.471381859
E07000216	2015	0.634788665	0.673888484	0.654185172	0.486983715	0.237762065	0.172095035	0.632680153	1.23750477	0.331911015	0.445338439	0.195755166	0.417399364	0.4292953	0.821977057	0.850864838	0.27382234	0.879350413	0.562662768	0.144952268	0.976892282	1.060593462	0.695389062	1.119427429	0.381092996	0.551864541	0.406402889	0.154109017	0.91914628	0.079744376	2.332933414	0.072744168	0.252053368	0.220197735	0.974512411	0.710253675	0.203859939	1.845608298	0.440824788	0.297669079	0.113172157	0.279330791	0.095514353	0.386007062	0.793104135	0.393250176	0.244683978	0.337024982	0.478721717
E07000217	2015	0.584177944	0.638374885	0.631411152	0.459449069	0.222879956	0.153188131	0.601716851	1.157134566	0.320636185	0.41344429	0.180814232	0.37265868	0.415756008	0.80068246	0.814204115	0.253282736	0.817429323	0.53405513	0.142581297	0.90937469	1.01815899	0.62742505	1.042569391	0.344044242	0.499159653	0.378702936	0.145568722	0.840375767	0.078677628	2.147462229	0.069351329	0.243156592	0.200935611	0.93301463	0.669751442	0.195605085	1.673661862	0.389333993	0.277590068	0.126283511	0.257074323	0.086453569	0.357538457	0.746222993	0.375228926	0.231609285	0.31504389	0.460657321
E07000218	2015	0.591363457	0.658613624	0.619197096	0.45116595	0.215798838	0.160474836	0.591794646	1.321466818	0.326060099	0.418478605	0.19587127	0.399004625	0.406251625	0.80891524	0.853010342	0.256683577	0.855320199	0.5484528	0.135952276	0.940045879	1.016364952	0.663957418	1.098032245	0.374273496	0.516580015	0.395421872	0.139674986	0.912231181	0.073647197	2.289162941	0.066800403	0.239060615	0.212561759	0.954872443	0.701519997	0.192198451	1.747551318	0.434925651	0.281977488	0.10360824	0.269407486	0.089301369	0.349454164	0.796121087	0.381405202	0.230335934	0.311622011	0.446022758
E07000219	2015	0.549436319	0.594990786	0.595366981	0.417648564	0.211568136	0.151393952	0.566502785	1.273486546	0.31117492	0.395543687	0.187432252	0.364815459	0.378182419	0.799115983	0.794283892	0.249855149	0.787327613	0.513965758	0.13532724	0.902142186	0.966562732	0.621963762	1.034414006	0.351033786	0.481647833	0.36397479	0.133966403	0.836504945	0.079226072	2.107561126	0.063308832	0.230150186	0.199809832	0.909593278	0.67016206	0.187336894	1.491124993	0.393466401	0.276067391	0.12284258	0.253716935	0.090735508	0.350056669	0.724603341	0.357404936	0.222004553	0.297207491	0.421474311
E07000220	2015	0.568514291	0.62442023	0.622334184	0.432039292	0.220987892	0.15230688	0.595322109	1.166619802	0.316322293	0.396849313	0.182361163	0.365343163	0.412386928	0.769698351	0.800660625	0.254530228	0.79462366	0.518313522	0.137362401	0.891323053	0.984144677	0.617093567	1.030859389	0.343842381	0.48574643	0.361666915	0.138772904	0.839443048	0.075181536	2.100823566	0.063979804	0.235769662	0.201870446	0.920676104	0.652196967	0.192793782	1.648661691	0.38220534	0.275318186	0.111265096	0.252191783	0.084670689	0.358646582	0.763235219	0.361338468	0.232772853	0.309156417	0.439636364
E07000221	2015	0.624989701	0.671605535	0.639402572	0.464059108	0.227818953	0.170719599	0.618795965	1.30042361	0.331042167	0.435555899	0.203413771	0.426488066	0.421121732	0.81690154	0.866738867	0.269714489	0.876783689	0.557862147	0.138694328	0.977839196	1.0453097	0.698022794	1.128466238	0.390793097	0.546524343	0.404634898	0.14952785	0.950678765	0.074834496	2.377906792	0.068424516	0.247294538	0.22571561	0.979580017	0.70998911	0.201049542	1.849289478	0.455469035	0.293132377	0.106796123	0.286404438	0.09283611	0.376678311	0.827794796	0.383472663	0.244988074	0.329198153	0.455986455
E07000222	2015	0.571945433	0.615949453	0.625113768	0.437483068	0.224555995	0.153160699	0.592399138	1.194388099	0.308213846	0.396295197	0.179838243	0.37378923	0.407763053	0.785511087	0.787277388	0.250233644	0.792365645	0.517291582	0.141607407	0.885202639	0.973813403	0.617804199	1.023506394	0.341508064	0.488993033	0.364698492	0.141743837	0.828753061	0.079023512	2.090529367	0.062792158	0.235481526	0.202682121	0.919836969	0.646091408	0.19261772	1.624919163	0.38413078	0.2760147	0.115310488	0.251427772	0.087130196	0.362144281	0.76736035	0.356266789	0.230342183	0.311681517	0.439332824
E07000223	2015	0.628802029	0.664631812	0.641059901	0.463839767	0.224197358	0.168264718	0.612505185	1.365323928	0.332708472	0.432760063	0.2046316	0.414209078	0.419866514	0.827808137	0.887114834	0.266499009	0.874718826	0.560202013	0.136870682	0.98454286	1.048451559	0.69880566	1.135130687	0.393029255	0.546379855	0.401530885	0.144052556	0.94375322	0.073155573	2.40960481	0.067693715	0.247465795	0.224129034	0.98166561	0.709931968	0.202464426	1.797963128	0.452635856	0.296208275	0.114676467	0.27972647	0.092661036	0.358782999	0.856360174	0.394407131	0.242945441	0.323231796	0.453914537
E07000224	2015	0.644149685	0.664848184	0.648418343	0.471885156	0.235041243	0.178003563	0.627114042	1.371080984	0.332903514	0.445078167	0.213233583	0.432505668	0.418977049	0.82928612	0.876488941	0.27640273	0.885229981	0.561748414	0.139097995	1.007742149	1.051099912	0.723606504	1.159624439	0.407532789	0.568009126	0.401834831	0.152117394	0.967253215	0.078135582	2.443293765	0.067130735	0.250263706	0.233537438	0.983582645	0.720248337	0.208726972	1.803330421	0.473012381	0.307070564	0.116727229	0.293343764	0.100134435	0.39234854	0.854791282	0.383627121	0.252068877	0.336880475	0.452529075
E07000225	2015	0.642582428	0.68104129	0.656023115	0.479535908	0.238866798	0.178990652	0.638222782	1.319719887	0.332155342	0.448868323	0.207729893	0.430665382	0.42805914	0.815531191	0.859820488	0.274731178	0.886899284	0.565869441	0.143187185	1.001193641	1.049435918	0.71568342	1.148904676	0.402368444	0.562571649	0.404144162	0.153803968	0.952384035	0.08085244	2.397212195	0.068611525	0.252338417	0.23211722	0.986696731	0.712047095	0.208298131	1.841219483	0.463141615	0.307028234	0.107572877	0.293026555	0.098296645	0.39513727	0.841049877	0.385629308	0.253461461	0.340138195	0.462132569
E07000226	2015	0.534126835	0.603515943	0.607579626	0.435633824	0.220152533	0.145017872	0.585158417	1.171653251	0.303605947	0.389284117	0.171425167	0.337930922	0.395127883	0.772139685	0.760240883	0.241368774	0.762425839	0.511941528	0.142724639	0.86191884	0.96867882	0.578421329	0.992448789	0.324751475	0.455635325	0.348856211	0.129802354	0.773656637	0.085891132	1.946369883	0.066858181	0.233999064	0.193041757	0.904562761	0.641553919	0.191565711	1.408303902	0.350162688	0.273456857	0.138710793	0.237416227	0.08424509	0.348360301	0.688699108	0.356998547	0.22351166	0.298560421	0.430867081
E07000227	2015	0.629847348	0.666852505	0.659342808	0.467469455	0.238003561	0.169644761	0.635620906	1.264450105	0.338845274	0.437867428	0.199304403	0.422416377	0.429077124	0.838394743	0.865469531	0.275898644	0.869469666	0.554190186	0.145238031	0.979589602	1.062166845	0.698591826	1.124657864	0.384739168	0.551723948	0.400839423	0.153924281	0.933328784	0.081936964	2.341288917	0.070174227	0.253643174	0.224879172	0.989474759	0.714988974	0.205480661	1.826005105	0.437476453	0.298447882	0.119888424	0.280005082	0.096237389	0.393715495	0.829299607	0.38533538	0.248230614	0.335995033	0.471424791
E07000228	2015	0.62237687	0.671358572	0.653147976	0.468230641	0.23125181	0.165448367	0.623268767	1.209606706	0.332381589	0.433513065	0.194136193	0.401753561	0.429808415	0.816259585	0.858483997	0.267191375	0.865748495	0.557629025	0.143243298	0.961184785	1.051203259	0.672632899	1.104910815	0.373839721	0.529583371	0.397186427	0.147585938	0.907839523	0.077747927	2.289935765	0.069449046	0.25187987	0.216915817	0.972055498	0.69889826	0.201988614	1.789695741	0.427853211	0.291280792	0.113024426	0.274357569	0.090907713	0.370895503	0.802597429	0.386534287	0.242528729	0.329926376	0.467396072
E07000229	2015	0.611922934	0.653756462	0.638951422	0.458172068	0.226979376	0.165242011	0.611488565	1.338081106	0.329123418	0.429696619	0.199609776	0.401882145	0.416494914	0.823685736	0.853842064	0.263924609	0.854888167	0.552871437	0.141587348	0.969765867	1.036612947	0.677714682	1.110485491	0.380041412	0.537161624	0.390294374	0.14346325	0.910103591	0.077642972	2.317249708	0.067170475	0.247983687	0.216359636	0.962302497	0.700864767	0.203029219	1.708311352	0.430410201	0.293671921	0.121507575	0.275128931	0.09314287	0.370788235	0.803368233	0.384732919	0.23992391	0.320554727	0.452490936
E07000234	2015	0.617079026	0.650057032	0.627975742	0.450493729	0.221953114	0.165617472	0.603049738	1.230092073	0.329504007	0.427048567	0.197342614	0.406732222	0.413149945	0.808978101	0.85338111	0.261099894	0.859428283	0.545807635	0.134984871	0.958127043	1.031287789	0.682025263	1.099531746	0.378513485	0.537116028	0.398833557	0.146416229	0.916660887	0.07261876	2.316621768	0.06843749	0.24449147	0.217200343	0.954637084	0.697636956	0.194731355	1.804663151	0.440423595	0.287677518	0.100841559	0.275249638	0.091916895	0.361620528	0.801803335	0.380752288	0.235327368	0.32193759	0.450991296
E07000235	2015	0.623902529	0.665767056	0.630831475	0.453440438	0.225655877	0.173435528	0.61633835	1.308067905	0.330888534	0.439443149	0.207299119	0.420369601	0.407710119	0.813231465	0.8584896	0.268701714	0.873428852	0.549895542	0.136218565	0.996160676	1.040403989	0.705382985	1.136993216	0.401699251	0.548181532	0.402251184	0.148346804	0.954789737	0.07756569	2.378188143	0.06606707	0.24635915	0.224176405	0.965971515	0.708569959	0.201704059	1.820942518	0.462404155	0.296983782	0.089952419	0.288979216	0.096306773	0.381975841	0.826436925	0.374741491	0.247480639	0.327729724	0.449673145
E07000236	2015	0.536710875	0.586769481	0.570491912	0.416291584	0.200637475	0.144341485	0.540527019	1.385546521	0.311875622	0.389580901	0.186426862	0.37590566	0.360714897	0.825270316	0.805101468	0.243493418	0.783384216	0.505611419	0.137130254	0.891372614	0.964001098	0.616672602	1.032184103	0.350027385	0.474373604	0.36942548	0.125363373	0.835515799	0.07406469	2.126711409	0.065847687	0.223918707	0.194284161	0.895815282	0.677571335	0.181688668	1.411347129	0.393730858	0.264574546	0.141088326	0.250328424	0.088842414	0.324294471	0.740453888	0.364991776	0.211868014	0.28113533	0.422107971
E07000237	2015	0.558700746	0.611649554	0.602726756	0.438602464	0.20779434	0.147842885	0.564145995	1.299406747	0.311934001	0.397131654	0.182384421	0.367175352	0.39154317	0.807806239	0.813978366	0.246264005	0.806930885	0.526125823	0.135260733	0.897848936	0.991100816	0.619572216	1.038286928	0.34597328	0.486179657	0.373063402	0.132824771	0.843050285	0.073664803	2.158991602	0.064225797	0.231422776	0.197867692	0.922598716	0.671973104	0.187393125	1.57449627	0.392829275	0.269580649	0.13485822	0.251999174	0.084371796	0.327851753	0.748681098	0.374156607	0.217460579	0.293145996	0.433546792
E07000238	2015	0.617028464	0.669003246	0.629467346	0.455558551	0.224008021	0.16986165	0.609188131	1.302232371	0.326627277	0.432246916	0.200911351	0.420644057	0.413360946	0.80754836	0.856716307	0.264947345	0.870794349	0.556080587	0.137513269	0.964767653	1.02772097	0.691267607	1.119702748	0.388497796	0.534489229	0.402227501	0.145139954	0.925658523	0.074399103	2.333235978	0.068972302	0.244810383	0.221052669	0.964537348	0.702349004	0.197371908	1.799410105	0.45310474	0.291402831	0.100732136	0.283177138	0.092562339	0.36555193	0.816238505	0.383335621	0.238756699	0.324098162	0.44873826
E07000239	2015	0.591800819	0.625258047	0.616231522	0.444003148	0.216719819	0.163970778	0.587272162	1.3723843	0.318221941	0.418188594	0.200398216	0.407965607	0.393281395	0.820331815	0.832246019	0.259003035	0.839546932	0.534902114	0.135900251	0.949441382	1.008048042	0.674548589	1.096117422	0.382198462	0.522566275	0.390772116	0.142913126	0.909862963	0.077349409	2.292799035	0.064085792	0.236762656	0.215454455	0.940898722	0.699016199	0.194165961	1.665906148	0.438784895	0.28807897	0.12348158	0.275517431	0.094301059	0.360179679	0.795530405	0.371429909	0.231592812	0.312517715	0.435034041
E07000240	2015	0.589161739	0.622287114	0.627347036	0.450364993	0.225947912	0.152606245	0.598305455	1.064861982	0.320926751	0.411531619	0.177225053	0.371792642	0.412458247	0.782208683	0.811080333	0.254231639	0.807075673	0.51713534	0.138762252	0.907146278	1.014145046	0.629741821	1.02839393	0.339642305	0.504141966	0.369762882	0.144784872	0.830435861	0.076566138	2.126195488	0.06862756	0.239315222	0.199866605	0.913410511	0.659129542	0.192546731	1.688335651	0.383877271	0.274579955	0.116338546	0.252489689	0.08638695	0.356405978	0.7310267	0.367796632	0.228546618	0.317055565	0.455096397
E07000241	2015	0.537292742	0.576045114	0.587696887	0.408413644	0.214409522	0.14455037	0.566803071	1.136324473	0.306008037	0.384787539	0.175435681	0.339895296	0.379587541	0.766698613	0.754400034	0.241139309	0.743753308	0.491919498	0.137353173	0.87056714	0.947617768	0.589208513	0.986808397	0.325489382	0.463561136	0.343092252	0.130009525	0.775016863	0.081645896	1.96182384	0.062422165	0.227156476	0.190998395	0.879805704	0.632098773	0.188050541	1.414306109	0.352470827	0.268251614	0.1164962	0.239542771	0.085937731	0.349533705	0.700727045	0.343535757	0.220440692	0.292984751	0.422092186
E07000242	2015	0.607435491	0.673046306	0.642135378	0.46683217	0.22448008	0.159696445	0.614803015	1.168386921	0.329966797	0.425387301	0.185362157	0.398043349	0.430306674	0.811852358	0.853677861	0.258924199	0.855105986	0.550549791	0.14174567	0.936023942	1.048850837	0.654719355	1.079300138	0.360121779	0.52170842	0.397171711	0.14555166	0.883032519	0.075357921	2.249768631	0.071618049	0.24926395	0.210604399	0.965872381	0.689463689	0.196309201	1.837153484	0.412880384	0.281473541	0.109773679	0.268129942	0.085802958	0.354829001	0.796542646	0.390872322	0.235743745	0.321185493	0.47143011
E07000243	2015	0.543889714	0.610618537	0.602045839	0.430873987	0.211544957	0.145281806	0.571811006	1.181417835	0.315598219	0.391951774	0.177232389	0.34906045	0.392604039	0.780340866	0.784537147	0.2447517	0.774277851	0.514117071	0.138694792	0.878507318	0.975398349	0.598719633	1.014921622	0.333594407	0.470843016	0.357847956	0.131588561	0.810682038	0.07732714	2.048623147	0.066596235	0.231022218	0.192868462	0.911411359	0.653596946	0.188839813	1.518568262	0.367770385	0.26773267	0.120915135	0.245923991	0.083915915	0.343034496	0.714265714	0.36399895	0.222044706	0.293141497	0.436911905
E08000001	2015	0.523458273	0.569945821	0.58327456	0.395848004	0.211828897	0.143775049	0.559692218	1.213388953	0.302757321	0.378788586	0.178441244	0.342148916	0.366452806	0.775404871	0.763840247	0.241250641	0.746557768	0.491378355	0.132387853	0.869688996	0.93883585	0.590632893	0.994302185	0.332968055	0.455382981	0.342563303	0.128100481	0.78504815	0.082758018	1.975200633	0.062621114	0.225583641	0.191895584	0.888953025	0.640639761	0.185234572	1.370734819	0.36133878	0.270227259	0.132762683	0.238625484	0.087367671	0.347931291	0.695762243	0.340360443	0.218319468	0.288615744	0.405180236
E08000002	2015	0.55371921	0.600652464	0.604637779	0.419864866	0.215969867	0.150242478	0.574040482	1.211352948	0.309545446	0.39395197	0.183137828	0.36054862	0.388172267	0.784064678	0.788053671	0.249444724	0.784881472	0.511979155	0.136240435	0.891299639	0.97067028	0.614333704	1.026674182	0.34434031	0.479176879	0.359146277	0.135015072	0.820908244	0.080100283	2.079990381	0.063839899	0.231679567	0.198823351	0.905893728	0.661070272	0.188492524	1.510426491	0.382363796	0.274547218	0.123379101	0.248310321	0.088651127	0.352864871	0.716187227	0.356550525	0.222434468	0.302453492	0.426918644
E08000003	2015	0.434451054	0.482569443	0.519861267	0.358589833	0.208832543	0.12134559	0.506381382	1.110145996	0.264955156	0.321049074	0.152669122	0.27179067	0.332479965	0.731488583	0.627061086	0.206972614	0.60189099	0.416307124	0.146332404	0.734189971	0.817617892	0.471524471	0.837959536	0.262548523	0.369442338	0.274095181	0.106906728	0.616955383	0.088831525	1.541500111	0.054149187	0.196623674	0.160518106	0.803518991	0.546854869	0.172835527	0.956591836	0.264967151	0.240514248	0.14345259	0.197420413	0.082448876	0.322338796	0.572686971	0.290593021	0.198359966	0.262111607	0.372354917
E08000004	2015	0.496167715	0.538094398	0.565443202	0.372105919	0.214410104	0.13793639	0.550001901	1.14415055	0.292674896	0.364302506	0.171303873	0.318093907	0.349869624	0.754450296	0.721583792	0.235425213	0.703973213	0.463599239	0.131199093	0.840543008	0.899689712	0.560324804	0.94826891	0.316555372	0.428637859	0.317176679	0.125324973	0.733031035	0.089455353	1.826360187	0.060844798	0.219026588	0.185599164	0.857752228	0.612923885	0.182610856	1.226716656	0.332382955	0.26630214	0.139238158	0.224694614	0.088084809	0.354998013	0.642022067	0.315641713	0.215554199	0.284464696	0.388500132
E08000005	2015	0.511662542	0.556021911	0.577511019	0.386292672	0.213345493	0.142034898	0.554370215	1.197635997	0.297994787	0.373694796	0.175505246	0.332476156	0.357640853	0.779200966	0.742473903	0.238120376	0.727834343	0.480205602	0.135356802	0.859765608	0.921617559	0.578100405	0.974992344	0.32675913	0.44442185	0.330384016	0.127116231	0.76109588	0.087674071	1.914250895	0.062154955	0.222415839	0.190199566	0.875411378	0.632343269	0.183666662	1.29659865	0.349543073	0.269047032	0.132222084	0.232985314	0.089348361	0.351087519	0.660274041	0.329470437	0.216725576	0.287624351	0.400095921
E08000006	2015	0.508094477	0.565174926	0.564089214	0.409450167	0.195918088	0.138228792	0.526772353	1.298254229	0.296437278	0.369662946	0.177326721	0.338145163	0.360339468	0.783186594	0.752268055	0.228809101	0.740798659	0.493393258	0.135810894	0.84547154	0.927235832	0.578929646	0.982267745	0.32492882	0.452199232	0.345516023	0.122230282	0.772786816	0.074888129	2.015157915	0.059819166	0.215897761	0.183725172	0.863757818	0.639455202	0.179652065	1.364882189	0.36222744	0.258345626	0.129616009	0.239648287	0.084990745	0.313619574	0.694803046	0.349663612	0.205004139	0.273443144	0.409027819
E08000007	2015	0.579080776	0.625816749	0.615525766	0.439826338	0.216996998	0.155042949	0.584998637	1.25310754	0.319766271	0.408461193	0.188304235	0.380003034	0.39707449	0.798778618	0.820078339	0.254438335	0.817036929	0.529092891	0.135970905	0.920793817	0.999170722	0.644464637	1.06200622	0.358537836	0.503527173	0.374686111	0.138560899	0.864911289	0.076987425	2.196087743	0.065843574	0.236384452	0.206119153	0.929112962	0.677394801	0.192234372	1.634087899	0.407454046	0.27916034	0.115752214	0.260330864	0.088719451	0.353251779	0.759432166	0.371177354	0.228592542	0.305444216	0.438161642
E08000008	2015	0.538204491	0.594018549	0.586314889	0.416359776	0.205515253	0.14730133	0.553048921	1.329525644	0.309665606	0.389864405	0.185268971	0.361138799	0.369279441	0.807876321	0.793299495	0.243590291	0.781475551	0.512192653	0.136461574	0.893156075	0.964643797	0.616459456	1.033846061	0.347609608	0.475656005	0.362693533	0.129979651	0.825031675	0.077348219	2.11564859	0.064808057	0.226028195	0.195771874	0.901423447	0.671582618	0.185052691	1.451687735	0.389333542	0.269662797	0.129704049	0.249988164	0.088541286	0.334151412	0.724343011	0.359115996	0.215806079	0.287600623	0.419255504
E08000009	2015	0.548685754	0.600226069	0.608355787	0.418228393	0.223595752	0.148881541	0.58956542	1.12199453	0.312258296	0.390410111	0.178755659	0.351628607	0.394865001	0.767859558	0.769069558	0.249824674	0.76202042	0.503433507	0.138820139	0.883781899	0.968646931	0.604944003	1.00939673	0.334818812	0.473513997	0.349622521	0.13492216	0.798977936	0.082745874	2.002649802	0.065142197	0.233999757	0.197354062	0.907948425	0.640937526	0.193917685	1.504520367	0.362366857	0.273848145	0.118964787	0.246384962	0.087667519	0.364703371	0.718894042	0.347291209	0.230665453	0.303288909	0.430351405
E08000010	2015	0.567624824	0.619044762	0.598069808	0.431814587	0.205849767	0.151893123	0.564478172	1.345278047	0.319269264	0.40410093	0.190813487	0.380983677	0.387299814	0.821918215	0.834495667	0.249582836	0.822922444	0.529975318	0.135118224	0.919585125	1.000883049	0.63957962	1.065751042	0.359844245	0.497353267	0.383442922	0.134684996	0.871061565	0.072381635	2.223520262	0.065743514	0.23284718	0.201818227	0.92703463	0.691026647	0.186715723	1.600851471	0.411999803	0.27357255	0.124831787	0.260093558	0.08753768	0.330078592	0.761084588	0.377306113	0.218243512	0.297139364	0.431756305
E08000011	2015	0.561075057	0.610786095	0.585523489	0.43528172	0.197116966	0.151568538	0.548274082	1.375022903	0.322324746	0.406091452	0.191541737	0.373616247	0.376479089	0.831667574	0.823915453	0.250497582	0.819004558	0.534624316	0.133223887	0.925646304	0.994847583	0.642969945	1.064320515	0.359487273	0.50582441	0.381983722	0.133901289	0.860227459	0.07170025	2.254334994	0.064833805	0.230016127	0.200910128	0.905760872	0.707435701	0.182649213	1.547051157	0.412333424	0.271293355	0.125382639	0.257625392	0.088676644	0.322611229	0.734883564	0.380647784	0.213102124	0.286063381	0.429498044
E08000012	2015	0.512356155	0.562288604	0.567552539	0.402012271	0.201264845	0.14038818	0.533993588	1.333479403	0.298023516	0.371350641	0.177554882	0.344128373	0.35836713	0.801131634	0.74636925	0.232773496	0.73552329	0.489679553	0.140304907	0.854082148	0.921229798	0.584348572	0.982848776	0.325660989	0.458730399	0.339086799	0.125730039	0.763318518	0.081211969	1.997599858	0.059482305	0.215807633	0.189741184	0.860944911	0.643868959	0.179993298	1.33695297	0.359882172	0.262605052	0.119743496	0.233600123	0.087994232	0.326655278	0.695843485	0.345357834	0.208427517	0.277927305	0.406926016
E08000013	2015	0.57882313	0.622162251	0.598730893	0.436072463	0.205239956	0.155711742	0.565462604	1.365016958	0.322132609	0.410194831	0.194864349	0.392798602	0.386548384	0.826762152	0.843207221	0.253147403	0.832884428	0.532442176	0.134098095	0.93422996	1.002622725	0.658453496	1.082642489	0.369379441	0.513612161	0.388849777	0.137496787	0.891014484	0.071757302	2.285288069	0.065097365	0.232254438	0.205982671	0.925759267	0.699093383	0.186836648	1.650770639	0.428000545	0.276962844	0.116670962	0.266065116	0.089891563	0.334348132	0.780214046	0.379528601	0.220522336	0.298595969	0.433204531
E08000014	2015	0.595430038	0.628864929	0.612922075	0.446158096	0.215155053	0.162201112	0.584867166	1.363487547	0.326534357	0.418621331	0.200363381	0.399520099	0.394645185	0.820927863	0.845302406	0.263561806	0.843441259	0.540568864	0.135108055	0.957232758	1.015718021	0.680611571	1.104243155	0.378599368	0.533140424	0.390129002	0.142067747	0.908187966	0.07451242	2.327498685	0.064266073	0.237285651	0.215541547	0.943285653	0.706782875	0.193740234	1.665695524	0.438806715	0.285767422	0.116799159	0.271056898	0.092979349	0.355494669	0.796313158	0.379666678	0.230555444	0.310582251	0.436549158
E08000015	2015	0.584615165	0.621909812	0.602447001	0.435934579	0.210617744	0.158266756	0.571417135	1.334524035	0.320405965	0.411908532	0.194834299	0.388878037	0.389012852	0.81446504	0.827404336	0.256475954	0.827727965	0.530186322	0.135541734	0.938401284	0.999872721	0.660322622	1.080229254	0.368711779	0.518955812	0.381671568	0.139931022	0.882471257	0.073856242	2.271065038	0.063835624	0.233547833	0.207145221	0.918025625	0.695104591	0.189313305	1.619487808	0.424926869	0.278674922	0.114150536	0.264334357	0.090827104	0.34617856	0.764614485	0.373400431	0.22367998	0.303027906	0.432280498
E08000016	2015	0.562586855	0.611515178	0.591693745	0.432572758	0.201017864	0.152559105	0.556793823	1.381408058	0.319715383	0.403408926	0.191533312	0.384060346	0.379786504	0.819922442	0.824771033	0.24838362	0.816237066	0.527904911	0.133190193	0.917227031	0.988138339	0.645882454	1.063861027	0.361513025	0.503751636	0.380482275	0.135713775	0.873787862	0.072642444	2.242947307	0.0651185	0.228937056	0.203584998	0.914598771	0.695459674	0.184952005	1.597868249	0.415787887	0.273019276	0.121252016	0.260635101	0.089044656	0.330961584	0.763274632	0.376735379	0.216862515	0.29037392	0.429313911
E08000017	2015	0.549988525	0.593564344	0.572434419	0.420172341	0.196317589	0.148180756	0.541790489	1.34284053	0.312831353	0.397162868	0.189231928	0.374221413	0.366634423	0.805598239	0.809302458	0.24251434	0.798596945	0.513668022	0.129992462	0.904972124	0.969138399	0.632033406	1.044381506	0.355904054	0.492862854	0.372737083	0.129771836	0.852092128	0.069830243	2.194692123	0.064039352	0.224367427	0.197911488	0.888652391	0.679241137	0.181145189	1.531578889	0.405616064	0.26712199	0.120409952	0.255342956	0.087568967	0.321405389	0.743125085	0.368939463	0.211313969	0.282821821	0.418122204
E08000018	2015	0.551938464	0.594279653	0.584426364	0.420822095	0.204172803	0.150705911	0.556409677	1.326311578	0.314231025	0.39816694	0.188553237	0.374451439	0.37057325	0.806915222	0.804917499	0.246609956	0.798984334	0.515286845	0.1314356	0.907633438	0.971969539	0.634673973	1.045022696	0.3563705	0.490710675	0.369317255	0.133802158	0.850249485	0.07574328	2.166611768	0.064779615	0.227580667	0.202061107	0.903066705	0.680198605	0.184187273	1.519172638	0.402806772	0.273680066	0.125398085	0.25593717	0.089658621	0.336782396	0.735281861	0.363783157	0.216970159	0.289722236	0.41823177
E08000019	2015	0.512340817	0.553860709	0.562689895	0.397004649	0.204404389	0.139208019	0.538025941	1.216218501	0.295519886	0.368306958	0.174964627	0.33213482	0.360365801	0.764283467	0.735586756	0.233431443	0.721911745	0.478648572	0.133307171	0.841634558	0.915024453	0.572097873	0.967001851	0.319589633	0.44959593	0.332579057	0.123928308	0.758874208	0.077365985	1.936973715	0.059632068	0.216265844	0.185766917	0.858966916	0.623077861	0.181112509	1.343824147	0.349801325	0.260192789	0.119871177	0.231833336	0.085082004	0.332742203	0.691698468	0.337602025	0.211535072	0.278286253	0.403666974
E08000021	2015	0.505169332	0.544972586	0.554230585	0.392262595	0.199234935	0.135281184	0.525810794	1.275438803	0.291372774	0.362450224	0.169605154	0.328866918	0.351419739	0.779330307	0.731614286	0.225980227	0.718560609	0.476423796	0.134867898	0.830749147	0.900419914	0.561362314	0.9530422	0.312518724	0.439141273	0.328294628	0.121601239	0.736139579	0.079905008	1.916573547	0.05843787	0.212511653	0.183650258	0.850570898	0.621611539	0.175903529	1.299453271	0.343731092	0.257232166	0.124293444	0.225637932	0.083068767	0.319955702	0.684079527	0.335737972	0.203134015	0.272702547	0.39382815
E08000022	2015	0.585862973	0.63748611	0.61620909	0.444444373	0.211805457	0.157353832	0.580420423	1.365649357	0.324613618	0.416048764	0.196151846	0.388489126	0.397373908	0.82702254	0.845584319	0.254363005	0.83880471	0.542692528	0.136692102	0.946028911	1.021599176	0.658950767	1.090993209	0.370612105	0.518908423	0.386451888	0.138775112	0.896313324	0.074229892	2.295312573	0.066102615	0.238022846	0.208031649	0.94365071	0.702326691	0.192854457	1.643666218	0.42574005	0.281313245	0.114774063	0.266563277	0.090366901	0.345332558	0.775035075	0.386411251	0.226796154	0.302972888	0.440970752
E08000023	2015	0.57207288	0.620687353	0.603857071	0.433403355	0.207116099	0.15569437	0.569177005	1.398246745	0.322872336	0.408808981	0.195160855	0.387955471	0.384829583	0.824903615	0.82723929	0.25192608	0.824079079	0.532594304	0.134111699	0.932305563	0.994885404	0.654994417	1.081747512	0.368246856	0.515465298	0.380454445	0.136652972	0.880761535	0.075940589	2.27871757	0.063231134	0.231490179	0.206489957	0.930648571	0.696941114	0.188982748	1.625412249	0.422874859	0.279019645	0.112228368	0.264344112	0.091111985	0.341310605	0.776835289	0.378856201	0.223369547	0.297573324	0.432768023
E08000024	2015	0.562712545	0.608932366	0.595001067	0.424497931	0.204827588	0.153565732	0.560536121	1.396193886	0.320313645	0.403883369	0.194627276	0.382751118	0.376286445	0.832702994	0.825921965	0.251538729	0.817236054	0.527331716	0.134467831	0.928273274	0.989784351	0.649584423	1.074077411	0.365171669	0.50646384	0.379094962	0.135919027	0.869138805	0.075825328	2.246390896	0.063217911	0.229832351	0.204161602	0.919371319	0.697657428	0.186716995	1.555513264	0.415917055	0.277286795	0.117376835	0.261010172	0.091615688	0.336443718	0.760163012	0.374712332	0.219347979	0.29475635	0.425430967
E08000025	2015	0.45536299	0.494224912	0.539739671	0.346146188	0.221822142	0.128307445	0.537433128	0.982359676	0.273267855	0.335896204	0.158187424	0.278309118	0.339375063	0.71379841	0.64516497	0.219803286	0.623864548	0.422148394	0.137215425	0.773135416	0.842027918	0.497987443	0.863985313	0.2809849	0.383551379	0.276802475	0.117468854	0.644248712	0.094801953	1.568241877	0.057563724	0.208317419	0.17219414	0.817146868	0.553819835	0.181333326	1.031856408	0.279081346	0.255080437	0.137526551	0.204241686	0.086478966	0.356132172	0.577249025	0.283657858	0.213331434	0.276543519	0.373943485
E08000026	2015	0.493881023	0.530027111	0.562856285	0.368890296	0.215927667	0.136594166	0.551543992	1.074332607	0.288346723	0.356728768	0.167408539	0.307922156	0.357565358	0.7388591	0.696595879	0.226922879	0.680715531	0.453747732	0.137268392	0.819305077	0.883675794	0.543664056	0.922945829	0.304138278	0.420483298	0.306104473	0.124232556	0.709898213	0.08894962	1.758574976	0.059152416	0.215271029	0.18315016	0.84247571	0.587849215	0.183631569	1.215512471	0.317050338	0.263289777	0.1223437	0.220961596	0.087385612	0.357936931	0.654773362	0.308887153	0.214750448	0.283095807	0.389564144
E08000027	2015	0.555300032	0.591701273	0.593560285	0.416329733	0.211137795	0.152098878	0.568428278	1.245510557	0.313645388	0.396657597	0.18973281	0.36880013	0.378797083	0.78988419	0.796124337	0.248793149	0.788361928	0.50978948	0.132246659	0.905612562	0.96878356	0.63168321	1.037594189	0.353940047	0.489252577	0.362689334	0.134570485	0.840807107	0.07760164	2.125867271	0.062998067	0.229646645	0.202253964	0.903982123	0.665579977	0.188524154	1.523062535	0.395626022	0.276256213	0.119145397	0.25696356	0.091010701	0.350472094	0.74292695	0.356615558	0.223370563	0.297988242	0.420553721
E08000028	2015	0.479421923	0.522915246	0.558351524	0.359334612	0.220776553	0.135668835	0.550382273	1.074031584	0.287555739	0.354313391	0.169829777	0.302713286	0.348645115	0.739365752	0.695534308	0.228365297	0.673778158	0.448614334	0.134093849	0.819715029	0.884391754	0.54162763	0.921475734	0.306024618	0.413258691	0.300542185	0.125016125	0.706878911	0.090420435	1.735582754	0.059753383	0.217388088	0.181975305	0.852940171	0.590601398	0.186521765	1.152078415	0.313136541	0.264591924	0.136683261	0.221600662	0.089740393	0.369568894	0.631572663	0.304192113	0.218460374	0.282340902	0.385561201
E08000029	2015	0.573048518	0.608745548	0.61428034	0.428318684	0.222081934	0.156940937	0.5871772	1.168030429	0.316797805	0.404781446	0.188079035	0.375218542	0.393929865	0.784478109	0.797452927	0.256745982	0.796209171	0.515260914	0.135903122	0.914863092	0.981046011	0.639288281	1.044357827	0.355619285	0.499724137	0.365407666	0.140234233	0.849362031	0.079844851	2.130592544	0.064744655	0.235038769	0.206730507	0.915729147	0.665340265	0.19222709	1.604539338	0.399519185	0.280739337	0.1074088	0.2582701	0.09180864	0.368043041	0.743469839	0.354814716	0.231923485	0.310667067	0.43349581
E08000030	2015	0.505388398	0.545428876	0.571342073	0.37687218	0.218117583	0.142958531	0.560536474	1.11782054	0.294049149	0.368944688	0.177143508	0.325791444	0.357332701	0.751482338	0.726478259	0.235901514	0.714735434	0.470710504	0.132317349	0.85285969	0.910194435	0.576333518	0.962083973	0.325421949	0.440888575	0.322124778	0.129644973	0.755661241	0.088149643	1.863475298	0.060601584	0.221685287	0.191804281	0.868970118	0.614275264	0.185646748	1.282840279	0.344491143	0.272922765	0.120209347	0.234945514	0.09076906	0.365742893	0.659580009	0.318703218	0.221498461	0.289290597	0.392378286
E08000031	2015	0.486548309	0.530746473	0.56635048	0.374151921	0.224050863	0.139442147	0.550957876	1.137822158	0.287302143	0.357951913	0.175328437	0.315445043	0.351175046	0.7551359	0.69484997	0.234120951	0.682292012	0.455648895	0.1387179	0.82949028	0.887770513	0.557381421	0.944294464	0.314819512	0.428835321	0.307319251	0.122052777	0.724895645	0.090660796	1.791377639	0.058034115	0.215772772	0.185981357	0.863108865	0.601092821	0.187871511	1.19845723	0.32625462	0.267559646	0.13137684	0.228223323	0.093740513	0.367524684	0.645256676	0.311229538	0.221842966	0.286505043	0.393870059
E08000032	2015	0.473152904	0.518717666	0.550399761	0.357464465	0.214317653	0.131402597	0.543526346	1.052832992	0.282355478	0.350395696	0.16019548	0.297457976	0.340520837	0.720974744	0.690495155	0.225193162	0.666176714	0.441730795	0.126974998	0.802766896	0.869822187	0.52639424	0.89995831	0.297625283	0.403889076	0.297401334	0.121191389	0.686887748	0.090317119	1.687150287	0.059398872	0.215135883	0.176557722	0.828978152	0.579805112	0.178150671	1.133495957	0.304842223	0.258963236	0.138646472	0.211353066	0.083518558	0.351288345	0.606343022	0.301639413	0.211015912	0.276382704	0.372181164
E08000033	2015	0.549759203	0.602861675	0.592541537	0.419574985	0.207408919	0.149950127	0.561868536	1.299683338	0.310983386	0.395735374	0.185798603	0.366168899	0.378507683	0.799254469	0.800242294	0.246099334	0.791327142	0.51714782	0.135015657	0.899858597	0.970683444	0.621447942	1.038055095	0.35043074	0.483975772	0.367265927	0.131883917	0.835552949	0.076751368	2.131547401	0.064265521	0.229540849	0.198074116	0.908938335	0.671201233	0.186024558	1.515904938	0.393682271	0.271913277	0.125721907	0.251959716	0.0877022	0.338536504	0.72973003	0.360778316	0.218071144	0.292992261	0.421399253
E08000034	2015	0.51332186	0.560472795	0.584146865	0.389322346	0.217982876	0.142838708	0.563971545	1.1612439	0.297221552	0.37260268	0.174999696	0.332157767	0.363964072	0.763435495	0.737809314	0.23976639	0.724961948	0.479970597	0.134775953	0.8557566	0.922292928	0.577694875	0.974049308	0.325558067	0.443212011	0.32981319	0.128699051	0.763145913	0.086387405	1.891031928	0.06185068	0.224042555	0.190513178	0.880554338	0.62457186	0.185915786	1.316321253	0.346864744	0.27060319	0.131954032	0.233087241	0.088267088	0.360243305	0.673364865	0.327605339	0.221304348	0.290584178	0.400524767
E08000035	2015	0.521364777	0.569739741	0.575338476	0.405843283	0.206628492	0.139939721	0.545500956	1.199347376	0.295960085	0.369796912	0.17303665	0.336971778	0.372825769	0.759859652	0.746523464	0.233710607	0.732092277	0.486544726	0.135266149	0.83793205	0.922132079	0.570786018	0.968707931	0.320217676	0.450363573	0.338084198	0.124866398	0.766806307	0.075927707	1.953449981	0.060364068	0.219078035	0.185792567	0.867530552	0.619586712	0.182271695	1.390632954	0.352987154	0.259220329	0.12045759	0.234950631	0.083182547	0.331730951	0.705191528	0.342240038	0.213458362	0.281832921	0.41019255
E08000036	2015	0.550007244	0.60015349	0.589337742	0.417639867	0.204695904	0.15082229	0.557870542	1.328182353	0.313115843	0.396229373	0.18889587	0.371562357	0.373480296	0.805438782	0.804684702	0.247095128	0.797313013	0.515784955	0.132693114	0.906797578	0.969696781	0.630660498	1.046436518	0.355070293	0.48924684	0.368998488	0.132692728	0.848537023	0.075486818	2.165581357	0.063293381	0.228032636	0.199619347	0.904502375	0.676218672	0.184844007	1.522819908	0.40173579	0.272762746	0.11645242	0.25602096	0.089156681	0.337010221	0.740223847	0.363727166	0.217933918	0.291964576	0.419766082
E08000037	2015	0.569131402	0.617139403	0.602105461	0.430672035	0.206048546	0.152816303	0.567179672	1.361411854	0.318203134	0.404393329	0.193479768	0.381357268	0.386302355	0.817117352	0.829644229	0.247880949	0.819267386	0.530078806	0.133313655	0.926179692	0.995486519	0.647932034	1.070965887	0.363353491	0.508378712	0.381312356	0.134316821	0.869143248	0.073791661	2.247495677	0.06379929	0.232950305	0.203330706	0.919640573	0.68695332	0.188633985	1.596235429	0.413434258	0.27742638	0.115696418	0.262160231	0.089149691	0.334843568	0.777464057	0.377467147	0.220512744	0.294402742	0.427927225
E09000001	2015	0.513329964	0.607330932	0.646378135	0.397801236	0.24380829	0.142300587	0.607376702	1.40283413	0.307803464	0.364133279	0.180475504	0.371145549	0.40662834	0.784503198	0.742883578	0.246254471	0.716214433	0.489145304	0.150167174	0.831079675	0.903249249	0.577689702	0.997311333	0.327869573	0.442836578	0.333152813	0.134811425	0.777401749	0.091914105	1.901601601	0.050979872	0.226916325	0.189519865	0.912892854	0.588483765	0.200239675	1.319192061	0.337410426	0.283325888	0.083376078	0.236246417	0.087055458	0.401389921	0.790784326	0.331467584	0.248138827	0.318102222	0.424926998
E09000002	2015	0.435731171	0.481246155	0.550551762	0.355898389	0.241280409	0.128131973	0.545416107	0.826098011	0.269249972	0.322947596	0.158815139	0.24738493	0.353560594	0.713990344	0.586700607	0.214551062	0.571249458	0.417408133	0.164606961	0.73690433	0.835474804	0.453478559	0.826586143	0.263017712	0.347680627	0.267638654	0.113914339	0.621100564	0.098912153	1.403371482	0.062724276	0.208799906	0.162294066	0.848969412	0.528933127	0.195396235	0.914829862	0.243483329	0.254179661	0.166956117	0.216371594	0.090791008	0.384217227	0.54163569	0.269062788	0.228129045	0.278735693	0.405634745
E09000003	2015	0.511231162	0.568912945	0.608342496	0.400368686	0.244416058	0.14297938	0.605156379	1.001471251	0.297353011	0.370158852	0.167796668	0.310580723	0.393903758	0.747711352	0.701032971	0.242688415	0.692483292	0.471628671	0.152775278	0.831413098	0.927770976	0.548266487	0.946766161	0.304424744	0.428023703	0.311104085	0.131623727	0.710977994	0.100027757	1.72133909	0.063744082	0.230421155	0.18978209	0.883299112	0.597401615	0.198212383	1.262578188	0.307094943	0.275810679	0.12949526	0.22565861	0.089139188	0.386137604	0.643483747	0.317671992	0.23915448	0.311397513	0.418956027
E09000004	2015	0.567034249	0.608019096	0.624345509	0.439359061	0.228861563	0.153784142	0.593259083	1.138730025	0.32131177	0.402833575	0.188122373	0.359687539	0.406300059	0.806646716	0.782535267	0.255273081	0.782072375	0.519945846	0.147905491	0.901717525	0.993469517	0.618745604	1.032084022	0.346188469	0.485126255	0.362030274	0.141607275	0.83269232	0.081545414	2.075408774	0.068771579	0.237915454	0.20151445	0.942380131	0.663019816	0.200001782	1.568503254	0.378593807	0.279782899	0.12678521	0.257240458	0.09388991	0.373272275	0.736042413	0.360428833	0.238725422	0.312385299	0.456795096
E09000005	2015	0.430003733	0.490780113	0.597008782	0.329747388	0.283634721	0.131892483	0.626584533	0.744673903	0.280235263	0.315197993	0.155691625	0.246576418	0.386161754	0.687969239	0.59168603	0.225436369	0.548417724	0.39515145	0.172131725	0.728121287	0.818042803	0.446498363	0.82616674	0.255730245	0.324496182	0.23384917	0.130648142	0.580900849	0.116412767	1.218013132	0.057153989	0.220923217	0.171740843	0.864793326	0.508641249	0.208045441	0.82948821	0.207140154	0.277448404	0.139676397	0.211914643	0.093148836	0.452668239	0.579096427	0.244608041	0.259402929	0.315373515	0.380468337
E09000006	2015	0.592671532	0.637145581	0.656086368	0.452848075	0.246091925	0.161379781	0.630185564	1.085544705	0.327942611	0.409293709	0.188347166	0.374162165	0.43912803	0.796227327	0.792082707	0.262743744	0.795615166	0.530190485	0.153631124	0.909706864	1.011775782	0.62784639	1.041982597	0.351231342	0.502904114	0.364827694	0.152997084	0.845052982	0.085284472	2.094659595	0.070699632	0.247538625	0.209074293	0.965361862	0.657787447	0.209150391	1.690125417	0.38120469	0.289267766	0.120232743	0.262640528	0.094402508	0.400574508	0.764135681	0.360846454	0.251982444	0.335296304	0.473361014
E09000007	2015	0.513529938	0.568433284	0.621604564	0.399929971	0.248716278	0.144341308	0.608265262	1.09388857	0.300256758	0.359753254	0.161616728	0.317492707	0.414248791	0.75205	0.691937196	0.23155291	0.675377236	0.466602543	0.167762191	0.783449873	0.902196124	0.531371451	0.917284316	0.288134611	0.426442433	0.300763763	0.140231561	0.685475357	0.102273039	1.705842628	0.058400413	0.229130856	0.190023372	0.863332051	0.572123573	0.197882006	1.276337961	0.2911958	0.270034379	0.107770623	0.219157217	0.088058749	0.375798662	0.655316191	0.31188279	0.234592608	0.335575285	0.421347185
E09000008	2015	0.496388279	0.552373222	0.606210878	0.392314104	0.250547882	0.141922767	0.58980723	0.969813855	0.296642782	0.357072552	0.17316424	0.302195963	0.396252431	0.753003364	0.671772088	0.241665713	0.658963477	0.46602403	0.165946892	0.808474832	0.904155206	0.524629005	0.923100814	0.301040595	0.407977055	0.307134563	0.134424349	0.71417654	0.093140582	1.68426053	0.064930244	0.226647725	0.182174058	0.908934016	0.587409385	0.204662395	1.204541824	0.296668172	0.271152036	0.139751092	0.240741694	0.09277751	0.402299396	0.642906611	0.308324482	0.245828206	0.306293281	0.435578214
E09000009	2015	0.467929844	0.533614819	0.604118163	0.365506378	0.261662105	0.136080328	0.620394217	0.842788458	0.286097688	0.335426923	0.157140826	0.273795522	0.395124278	0.701586748	0.655868704	0.228781161	0.617156405	0.435252909	0.162913597	0.763515418	0.869305081	0.486246659	0.872445559	0.274994261	0.363097169	0.27321937	0.128807401	0.631610364	0.111256402	1.436364041	0.060201734	0.22714684	0.180707947	0.862921604	0.542655433	0.202051458	1.049248695	0.249226124	0.276602785	0.127054936	0.216042108	0.087244659	0.411704079	0.624551684	0.276485132	0.249358864	0.314610658	0.393270007
E09000010	2015	0.490401664	0.549224633	0.597564339	0.393683256	0.248617533	0.139764106	0.582314531	0.938734846	0.294131772	0.348876609	0.168820397	0.296028047	0.389869321	0.741818881	0.658666177	0.23513092	0.647463442	0.463309794	0.166750414	0.795375765	0.89863195	0.517254297	0.911311899	0.294257626	0.396528162	0.308228699	0.129937512	0.703286716	0.09192765	1.652813833	0.065691172	0.224073092	0.178446201	0.894064272	0.580173371	0.201119169	1.197769761	0.294430851	0.267319327	0.129453414	0.243758613	0.089985953	0.390146379	0.627616924	0.309427909	0.242859257	0.298391751	0.431803924
E09000011	2015	0.490585402	0.546582723	0.589849901	0.40043191	0.240294682	0.135975444	0.566843877	1.014092382	0.294545451	0.350487509	0.167313581	0.301484269	0.394815057	0.746914667	0.676944419	0.230097971	0.651049696	0.459127344	0.165177838	0.778631685	0.895831704	0.504328322	0.898111327	0.287976202	0.400547823	0.306671936	0.131770976	0.691542859	0.087089521	1.679770798	0.06539427	0.221661532	0.172630338	0.876924234	0.579422747	0.197433056	1.205851962	0.286209712	0.259108681	0.138532722	0.234037416	0.08648085	0.372139072	0.622452312	0.310878897	0.235013303	0.301786708	0.441091691
E09000012	2015	0.457892962	0.520722962	0.563003484	0.386208105	0.243428349	0.127940081	0.555638989	1.009287245	0.276185135	0.319857156	0.152187299	0.278066872	0.387639493	0.717663465	0.649567627	0.214036289	0.604808705	0.426447525	0.175502912	0.714368128	0.846745135	0.454570549	0.827782831	0.25436589	0.356288208	0.280960794	0.124236552	0.622774477	0.094326187	1.489841953	0.057159478	0.209555097	0.163843978	0.831102428	0.533330356	0.187648693	1.017702822	0.244090668	0.245856958	0.126899675	0.223222165	0.079065891	0.35151945	0.571751913	0.288488143	0.221493256	0.291542253	0.412197487
E09000013	2015	0.525986879	0.591599656	0.631541771	0.42725116	0.248084568	0.141484192	0.605500264	1.093724607	0.301061512	0.359781938	0.16281106	0.317827663	0.443204303	0.741467119	0.707359561	0.233096015	0.700851291	0.480022257	0.166413817	0.776074613	0.920485256	0.525414516	0.909319481	0.284715913	0.432436285	0.312380577	0.146345815	0.70306565	0.092124235	1.758513524	0.059814971	0.22848028	0.184995737	0.888124869	0.583360876	0.198294173	1.339326101	0.29443864	0.26257648	0.105215442	0.231628774	0.079128807	0.369617306	0.651440296	0.331461704	0.234536588	0.32680858	0.44007335
E09000014	2015	0.489146447	0.558809022	0.587857898	0.412240707	0.247547226	0.134377095	0.575862117	1.039820723	0.288663357	0.340371485	0.164496451	0.298652506	0.398169632	0.747734498	0.676969937	0.22993446	0.656351886	0.462516867	0.174949489	0.772394959	0.899106152	0.501070242	0.896681824	0.280096852	0.390690724	0.307090141	0.124260723	0.684406566	0.093343424	1.649221059	0.061763022	0.221635242	0.175512644	0.871079719	0.572923682	0.194451632	1.159086257	0.279203738	0.25974952	0.124985385	0.237024623	0.083192646	0.362998938	0.617295564	0.313994159	0.230975036	0.297610327	0.431249042
E09000015	2015	0.48231269	0.536945618	0.629352698	0.337296968	0.284817578	0.144039634	0.671777458	0.797921993	0.296575611	0.348731913	0.161498375	0.271038866	0.399776567	0.699728206	0.671139488	0.242516768	0.628273957	0.437417993	0.1560295	0.808580303	0.884011242	0.514410309	0.902759923	0.287967196	0.371740879	0.25654155	0.136028111	0.630145182	0.122559541	1.384914325	0.062616096	0.238304979	0.193191081	0.884261283	0.549229013	0.212215726	1.063023356	0.247538862	0.296749692	0.137576627	0.199117285	0.097535687	0.465733322	0.623081481	0.26842488	0.263824412	0.339417127	0.386545756
E09000016	2015	0.5915284	0.630210692	0.637489798	0.45129955	0.230774781	0.159493969	0.605944887	1.173206329	0.323574569	0.412128797	0.190347413	0.379735932	0.41906632	0.80145945	0.810165547	0.261089282	0.81291328	0.53283873	0.144729556	0.919027471	1.007704467	0.641085001	1.0589191	0.358715922	0.508362415	0.373931879	0.14618839	0.864232601	0.079909439	2.162898579	0.067478999	0.242417659	0.209847801	0.952003537	0.671077468	0.200720835	1.68305491	0.401018067	0.286223555	0.116481849	0.264303933	0.093141795	0.375220001	0.76859669	0.370238168	0.240277179	0.321598886	0.457415809
E09000017	2015	0.497758911	0.546287621	0.611303697	0.382066388	0.26239622	0.142140945	0.614454183	0.914751569	0.299955148	0.355676934	0.168465999	0.294904272	0.399198791	0.727797232	0.68334254	0.23997613	0.662258833	0.457038216	0.156382807	0.809621258	0.902911021	0.523018082	0.916942268	0.297596767	0.396450281	0.289651395	0.134792939	0.689603835	0.100204716	1.596870859	0.064761647	0.231992972	0.186150331	0.89338151	0.574595575	0.206556803	1.191114619	0.281154056	0.278155671	0.142664375	0.223118868	0.091675031	0.429255056	0.649211984	0.296277893	0.246736873	0.317679962	0.418037848
E09000018	2015	0.470302394	0.530181928	0.612609172	0.36556968	0.26585527	0.137180988	0.63139446	0.858048286	0.283744559	0.341317159	0.155289041	0.269187016	0.393950694	0.706090145	0.653398522	0.227416083	0.623172239	0.435155991	0.159930874	0.770486728	0.872318177	0.487489132	0.87349124	0.276499941	0.361354466	0.266717125	0.134301041	0.628061365	0.116171593	1.407538088	0.059943432	0.23163867	0.184889771	0.867325541	0.545121309	0.203672136	1.017020776	0.245344572	0.282711399	0.145764254	0.20471534	0.088569858	0.435379502	0.615681466	0.273535886	0.251043567	0.321721664	0.38823189
E09000019	2015	0.511669408	0.58156841	0.622174326	0.410198063	0.248788719	0.140558839	0.601173545	1.105024411	0.296749461	0.356018979	0.159785174	0.31510774	0.429919987	0.751319514	0.708647893	0.231549302	0.691705381	0.473386677	0.167142959	0.773752045	0.913586577	0.521977974	0.91469568	0.282705721	0.430545941	0.304791482	0.146718036	0.699098958	0.097193556	1.741550152	0.058114007	0.22752197	0.186516506	0.87503999	0.577838036	0.195276319	1.292034011	0.292376883	0.265438371	0.099442708	0.221136663	0.081929437	0.375259529	0.659059618	0.322910009	0.228571209	0.324296038	0.429045004
E09000020	2015	0.545665189	0.607631132	0.65347063	0.407324882	0.264775437	0.15228487	0.642480154	1.07730859	0.311731261	0.378545019	0.167456342	0.355206548	0.448523267	0.760807007	0.738260124	0.246092978	0.721353571	0.490459314	0.169247861	0.827900993	0.954149739	0.564610722	0.980287667	0.306861448	0.472700095	0.315938914	0.158191347	0.744138668	0.105235001	1.855639895	0.06101728	0.241615026	0.207760837	0.883264656	0.601068046	0.203489802	1.426116063	0.312499154	0.287438125	0.093491897	0.227559988	0.092104702	0.406974659	0.693550515	0.323001437	0.244478315	0.355598955	0.444299203
E09000021	2015	0.550509705	0.604473579	0.640745741	0.425716614	0.237282668	0.148818675	0.621262114	1.054646587	0.309552333	0.390875296	0.169255067	0.337100854	0.416068038	0.767959671	0.764374492	0.248404462	0.752284659	0.502253186	0.147568104	0.85798997	0.966617774	0.579629096	0.982396992	0.314669978	0.455704916	0.334996502	0.142454137	0.745114491	0.093979927	1.873136915	0.064350815	0.240344901	0.197020939	0.898490543	0.623885211	0.197961742	1.47806432	0.331610733	0.27846417	0.122593255	0.227242173	0.086068314	0.381025886	0.699047774	0.34194762	0.23681631	0.32824005	0.437397839
E09000022	2015	0.496036061	0.578308763	0.596473422	0.437188056	0.245874172	0.13120277	0.564084951	1.122749374	0.29594551	0.339137759	0.166078488	0.31212843	0.422730778	0.755795316	0.692070782	0.227374445	0.66786167	0.476873027	0.176655951	0.757931006	0.907033039	0.498731878	0.888331728	0.275038985	0.40357858	0.313663608	0.13298671	0.697655728	0.083103258	1.744139396	0.060650208	0.219540326	0.16893253	0.888888909	0.580808037	0.194287996	1.24560868	0.282970266	0.252156633	0.120235217	0.243725252	0.076928241	0.351465091	0.66160448	0.332824574	0.229089141	0.297561784	0.447603975
E09000023	2015	0.488049667	0.545844572	0.598825557	0.416442628	0.25949418	0.137077879	0.576878039	1.005524214	0.298071891	0.342198734	0.173823769	0.301773387	0.406866017	0.75699747	0.653683818	0.229977756	0.623692943	0.460571872	0.184824105	0.760830657	0.88933605	0.494565895	0.883076592	0.281447962	0.391616134	0.299802907	0.131764076	0.691180539	0.089596019	1.639563472	0.066693335	0.223153471	0.16990121	0.914137294	0.571833613	0.208403743	1.138935075	0.270647325	0.26216335	0.146130926	0.251041948	0.08904346	0.385205446	0.628003762	0.304427439	0.245794595	0.311250759	0.452400985
E09000024	2015	0.522964057	0.587133332	0.621578761	0.419147759	0.252171143	0.144723509	0.621446704	0.965429497	0.303932491	0.367880963	0.167443753	0.320004469	0.421543092	0.744063679	0.716786299	0.24093273	0.698638574	0.482104121	0.161214524	0.818007029	0.941820399	0.540957244	0.939487974	0.301752407	0.427771092	0.318178058	0.141357705	0.721189432	0.095493493	1.746215202	0.066307895	0.23668787	0.188276568	0.90376116	0.592145767	0.203599643	1.339995354	0.302233127	0.274942627	0.130491822	0.237911479	0.086065477	0.394590234	0.676292548	0.323652784	0.246184639	0.325003651	0.440043633
E09000025	2015	0.401025837	0.445591793	0.540289295	0.322368092	0.258088481	0.115374913	0.573107277	0.711679619	0.258439038	0.296341619	0.13711345	0.225590222	0.353641875	0.6797023	0.554182444	0.204262909	0.505587254	0.368370393	0.169868894	0.679518548	0.778937366	0.396297841	0.758996029	0.226038537	0.290948512	0.220486231	0.122517435	0.52851928	0.112240477	1.105733825	0.056563474	0.2055041	0.155003662	0.804726953	0.480965055	0.189056627	0.690647856	0.187239961	0.25480721	0.155160958	0.189897956	0.082057829	0.420570551	0.529627135	0.233958509	0.231473264	0.284982284	0.363120117
E09000026	2015	0.461570699	0.512517841	0.612154331	0.33464708	0.274770522	0.137513266	0.641076029	0.781514781	0.288484385	0.337279969	0.154153136	0.253762805	0.388054675	0.688009216	0.639691465	0.23219065	0.60450155	0.418587466	0.154872904	0.781448289	0.859594902	0.486251408	0.865896302	0.273993844	0.356138698	0.250548516	0.131322778	0.604627196	0.120858812	1.330083987	0.062221852	0.231125057	0.183898293	0.859448218	0.535743986	0.205914729	0.989325535	0.233016545	0.282471189	0.143047953	0.19841647	0.092514246	0.456109333	0.585355925	0.25695598	0.25307251	0.326324211	0.377445631
E09000027	2015	0.604513443	0.670566425	0.675561281	0.459599692	0.246216906	0.158806583	0.643658714	1.089678256	0.323104301	0.418874481	0.175377495	0.374292179	0.451176513	0.783760572	0.820492557	0.259923234	0.82692041	0.539465282	0.150734081	0.907647986	1.031073674	0.627239521	1.042622767	0.339268241	0.512855875	0.367160939	0.157335842	0.823860206	0.086537871	2.109000865	0.068938947	0.252670437	0.207478129	0.932946125	0.654620078	0.203828474	1.756467754	0.37456189	0.287201607	0.106681569	0.24903441	0.086463917	0.38440406	0.751820218	0.376468897	0.244571988	0.340014282	0.473078581
E09000028	2015	0.479878525	0.537909429	0.59062982	0.406858162	0.260795587	0.135303791	0.571908992	1.059068866	0.287355326	0.33288406	0.167268158	0.299236466	0.411873743	0.745654268	0.633325813	0.22949607	0.610901128	0.445159352	0.184491865	0.730152407	0.864998326	0.475873326	0.859168109	0.270130722	0.384956951	0.293799238	0.132169143	0.666152107	0.088716668	1.591964772	0.062982147	0.217193943	0.165708276	0.896333622	0.558893702	0.199317764	1.099747251	0.255770181	0.254055806	0.13485352	0.24418004	0.085381259	0.374531862	0.605381672	0.299042995	0.239388771	0.31345605	0.442621798
E09000029	2015	0.559208115	0.621091408	0.640372819	0.429093233	0.241302661	0.151779109	0.616765217	1.092534212	0.317154917	0.398181191	0.179997104	0.344100443	0.418424502	0.78030875	0.784660582	0.255914588	0.772855788	0.517541916	0.14862949	0.890639883	0.993631758	0.598112585	1.017354494	0.334502016	0.468687544	0.346329324	0.139465035	0.798211583	0.088557752	1.973978387	0.067363275	0.243141228	0.200243081	0.934280705	0.646727041	0.202647365	1.497216504	0.355039353	0.284933092	0.122796852	0.245726382	0.08896662	0.386557465	0.714883869	0.355441216	0.241270833	0.318257268	0.445678273
E09000030	2015	0.421462662	0.468366066	0.539831101	0.310387016	0.238398248	0.124884735	0.596030827	0.767474668	0.293684041	0.309301641	0.133391504	0.245637424	0.378227826	0.64796151	0.610079918	0.204021844	0.544862762	0.365117355	0.156356157	0.671159681	0.783799444	0.427250573	0.764736831	0.224264033	0.311487857	0.215340385	0.119190448	0.534852387	0.10655979	1.186465041	0.054345401	0.203365051	0.159276963	0.770153125	0.481211275	0.189522884	0.825886805	0.185063001	0.242288772	0.129194743	0.167503401	0.073728699	0.39535422	0.564927561	0.245556246	0.216281193	0.318074631	0.35870692
E09000031	2015	0.468251859	0.527108889	0.583710522	0.387376841	0.24978834	0.1327669	0.583643554	0.928999944	0.284021363	0.336056057	0.161497206	0.279275804	0.383816642	0.731976191	0.645528672	0.223751057	0.619611556	0.44156891	0.16867212	0.765815275	0.875933068	0.484327492	0.870114228	0.275313207	0.3698845	0.286202403	0.127449007	0.657418618	0.099778708	1.52576344	0.062429597	0.220998652	0.172598559	0.875848087	0.555386177	0.198441009	1.051463816	0.262250873	0.26501977	0.140761275	0.232348453	0.087017687	0.389428622	0.609315446	0.290311858	0.237250593	0.297039676	0.411610756
E09000032	2015	0.554818368	0.612754625	0.662079889	0.433127155	0.252412333	0.148976516	0.631585058	1.082986829	0.304491915	0.384943847	0.156170591	0.337259936	0.468864733	0.753332372	0.749457889	0.236435361	0.735131267	0.50287586	0.161699545	0.795911892	0.964822862	0.544896913	0.93328356	0.288292335	0.466441225	0.324702603	0.174755548	0.723075778	0.092802048	1.862640159	0.063345107	0.238382939	0.192917395	0.891157134	0.593279459	0.198242924	1.473099717	0.308256118	0.269801053	0.103800989	0.231273592	0.080485967	0.375821017	0.689290517	0.348168266	0.235677426	0.345603576	0.461133641
E09000033	2015	0.504114013	0.564093953	0.628108119	0.389081464	0.263877638	0.144564545	0.634225296	1.009459723	0.3110415	0.345396862	0.16479334	0.313002115	0.43619722	0.734679803	0.688088012	0.231596786	0.666605673	0.449722508	0.182176387	0.772485957	0.890011062	0.525304804	0.915996737	0.285069797	0.413938314	0.283961625	0.143981251	0.692492428	0.113725953	1.646876589	0.05674142	0.229745514	0.197944144	0.878756667	0.552544417	0.205215073	1.223936462	0.275113575	0.276878674	0.095152405	0.222001619	0.091531153	0.407851954	0.650948095	0.287791328	0.24462926	0.349643191	0.418955167
S12000005	2015	0.608802661	0.642654235	0.637132463	0.443492209	0.216833265	0.167025449	0.604058401	1.316408368	0.333311772	0.426154401	0.207853434	0.405741497	0.410349077	0.816006254	0.853032329	0.26188742	0.858980208	0.554263888	0.130815332	0.969582469	1.031102302	0.693143155	1.117312279	0.38875696	0.541883548	0.386748402	0.150436986	0.93659289	0.073785187	2.375612948	0.064768845	0.243339054	0.221937278	0.952472183	0.712307161	0.198257561	1.758720929	0.444750784	0.294737602	0.097412369	0.281105726	0.093778947	0.373531239	0.802591407	0.383963189	0.237560837	0.315791644	0.438443061
S12000006	2015	0.571632333	0.625686798	0.584504869	0.440422527	0.207047159	0.153282641	0.552540027	1.532203594	0.311784222	0.404608162	0.187407524	0.393368231	0.379267703	0.838455252	0.827936516	0.248539138	0.82429766	0.530558839	0.143533792	0.917275953	0.978775199	0.635656482	1.066803003	0.362001797	0.505943823	0.383721352	0.131320835	0.86480069	0.073488786	2.246829892	0.063746771	0.227924641	0.201973066	0.916882349	0.689359358	0.1845748	1.557707136	0.423716486	0.2698442	0.128071284	0.257707496	0.087128692	0.328505342	0.778061075	0.372637844	0.215919863	0.287388293	0.427298725
S12000008	2015	0.609303094	0.643912098	0.623890504	0.448050536	0.215299679	0.164946033	0.595864683	1.317727899	0.338988784	0.430329265	0.204504612	0.406784385	0.403953653	0.840956754	0.867133485	0.265993934	0.869288454	0.553754688	0.135160453	0.978569126	1.045877548	0.695762067	1.125599833	0.386101492	0.540546334	0.403279152	0.144277981	0.926542975	0.07551783	2.376694776	0.067771608	0.244528164	0.219679565	0.963644704	0.728772157	0.195018709	1.722983233	0.447042245	0.290992962	0.106381618	0.279924119	0.094404247	0.356490983	0.799903549	0.393821481	0.233318294	0.316662269	0.450138513
S12000010	2015	0.61333885	0.651891608	0.617000956	0.454700808	0.217737423	0.163654834	0.595077207	1.285904871	0.335873666	0.431591547	0.1997366	0.397728032	0.405941433	0.83415372	0.861947643	0.266972607	0.867754572	0.557811543	0.137680458	0.971040096	1.051620774	0.682050866	1.118051618	0.379442988	0.530980255	0.406046533	0.142062097	0.907483756	0.074639856	2.336247352	0.069530016	0.246182078	0.214969501	0.964809711	0.727826627	0.19548228	1.69729737	0.441924075	0.287845616	0.118743264	0.271708325	0.091790154	0.34918967	0.778544368	0.395091404	0.231627128	0.316347786	0.456353737
S12000011	2015	0.555403867	0.60977788	0.610921542	0.429246921	0.213222116	0.14515113	0.564738379	1.221435309	0.297363391	0.386346145	0.172175252	0.359051572	0.397216482	0.767820649	0.769743597	0.240222919	0.779188332	0.508004976	0.13677285	0.854298091	0.94364194	0.588595858	0.990660611	0.326877515	0.48587115	0.352568037	0.140611861	0.794817982	0.078466496	2.042410226	0.058944086	0.226686874	0.192706329	0.867822639	0.632925071	0.181931204	1.529389554	0.372571061	0.262626042	0.100865769	0.237275667	0.08192276	0.342463916	0.709464371	0.35455665	0.216373469	0.298471886	0.43043737
S12000013	2015	0.6182088	0.664814279	0.633307379	0.455175253	0.224768149	0.168009268	0.608437945	1.416723296	0.328489288	0.428757151	0.205223248	0.418948385	0.411760483	0.822670384	0.873738232	0.265157772	0.872108375	0.557535785	0.139630224	0.981032657	1.032833017	0.697592989	1.136272201	0.393568569	0.547163876	0.397542516	0.14646348	0.946869755	0.076508791	2.407476591	0.063439901	0.243923648	0.222868692	0.977446047	0.711787851	0.200575672	1.781104881	0.459210804	0.296384133	0.10017074	0.282924884	0.094309862	0.367016726	0.841045097	0.38839051	0.241574148	0.325067245	0.450083982
S12000014	2015	0.594693729	0.64384416	0.620571656	0.449132877	0.208845485	0.158064577	0.582191651	1.393455142	0.330123111	0.419832325	0.197850479	0.394547109	0.402827789	0.847887193	0.865855368	0.257187	0.862971779	0.556563349	0.138747904	0.954537698	1.039574604	0.669241492	1.109208934	0.374772973	0.524217906	0.402061256	0.141864408	0.903956262	0.073516218	2.342723623	0.067483855	0.242773139	0.210130853	0.952497178	0.724352011	0.192337814	1.661429867	0.432219832	0.284555653	0.123925947	0.269729635	0.090673243	0.335883951	0.786421288	0.397164664	0.223471197	0.3063272	0.447187435
S12000015	2015	0.588228101	0.631668342	0.625785905	0.439867197	0.219602253	0.159813658	0.591568748	1.353577705	0.324321788	0.414682315	0.197357494	0.392151282	0.401414172	0.830704737	0.840453773	0.259583386	0.837823765	0.541692647	0.139081971	0.944492137	1.016144503	0.659854117	1.092004963	0.372320735	0.516304796	0.385082489	0.142423031	0.895613414	0.078591134	2.267083364	0.065522784	0.240055817	0.211873414	0.954213866	0.703536707	0.1951776	1.633148427	0.422638145	0.286989831	0.122123814	0.267490511	0.093002369	0.360335021	0.772083705	0.378744008	0.231134732	0.311763835	0.440410439
S12000017	2015	0.607077146	0.65928118	0.628009711	0.45675342	0.216591694	0.16418367	0.598922858	1.429337255	0.332315719	0.427831371	0.203676213	0.413604962	0.40699341	0.842756686	0.876804947	0.264233038	0.870308068	0.559853037	0.139245178	0.975969481	1.045460753	0.686552637	1.130162744	0.387230921	0.537030676	0.404641645	0.143134381	0.938170419	0.074552823	2.386169434	0.067251216	0.243820813	0.217288974	0.975738115	0.724840697	0.197250687	1.72601289	0.448010831	0.287990025	0.119633537	0.279134054	0.091828159	0.356418659	0.813812889	0.390281865	0.234488593	0.315537665	0.449291897
S12000018	2015	0.600555151	0.64822604	0.622964404	0.449154927	0.212502291	0.162819818	0.585298631	1.458335784	0.333442172	0.425836477	0.204690883	0.403738022	0.400089945	0.866829179	0.874296115	0.261596631	0.869459301	0.561200646	0.141435185	0.980073809	1.04164834	0.690748394	1.133934536	0.387610925	0.54525206	0.402723945	0.145883016	0.920545161	0.075784149	2.40180417	0.066704899	0.240547003	0.21455464	0.959356652	0.735603541	0.193983489	1.686353009	0.445870183	0.289567361	0.112389468	0.274962394	0.09467772	0.348086382	0.795163263	0.39701592	0.227860643	0.308790878	0.443806873
S12000019	2015	0.589969899	0.640472672	0.617174631	0.448368752	0.212406516	0.159195514	0.583114455	1.340434519	0.32583271	0.417495812	0.195688278	0.394737982	0.398430929	0.834326707	0.847217376	0.258725729	0.849187238	0.548824062	0.140007382	0.94366463	1.02265663	0.662242852	1.095348662	0.372881523	0.513914313	0.395065622	0.140226702	0.90098476	0.074513319	2.290865204	0.068394989	0.238815555	0.210162373	0.957365768	0.711310222	0.192058446	1.654467473	0.428723897	0.28230374	0.121992032	0.271251611	0.091260885	0.345383343	0.765494096	0.386721801	0.226190916	0.308492187	0.444984286
S12000020	2015	0.592472438	0.640885331	0.611777264	0.451546981	0.207829953	0.160572962	0.581407051	1.397373868	0.332423972	0.426791601	0.202379611	0.402529504	0.391394258	0.845999786	0.862177898	0.258310943	0.859562505	0.549113029	0.137052924	0.976735628	1.038544373	0.68490714	1.124603961	0.384938562	0.532282083	0.400381214	0.141478463	0.926629087	0.073718318	2.371746349	0.068055107	0.239293746	0.212603031	0.956008773	0.724615824	0.193973496	1.682404766	0.442899297	0.285496653	0.115193378	0.28019654	0.092688896	0.347506783	0.798775662	0.387415954	0.229004727	0.305346076	0.446038006
S12000021	2015	0.603936864	0.648190947	0.619247041	0.449351748	0.211554614	0.164329979	0.582648636	1.421207253	0.334103322	0.428706463	0.205870564	0.410354865	0.395935832	0.862999588	0.871192595	0.263225666	0.874973513	0.559568861	0.139290148	0.978243439	1.040143014	0.693269665	1.137119738	0.390544444	0.541135434	0.404604802	0.145078261	0.930872884	0.075053584	2.413612019	0.066972761	0.240817464	0.216020617	0.961450958	0.738317683	0.192953889	1.701939165	0.455189696	0.291700571	0.115974335	0.279237908	0.095943385	0.348602129	0.787816734	0.398242541	0.22775375	0.312638282	0.444746628
S12000023	2015	0.608545501	0.671490343	0.637396978	0.456270218	0.216871364	0.166546315	0.607677301	1.428403642	0.330307346	0.431758119	0.202643218	0.417458314	0.41317027	0.834500602	0.871307134	0.259726423	0.869491576	0.561284282	0.141151918	0.972230666	1.042820379	0.692809011	1.135075063	0.39079861	0.542927222	0.401212445	0.150760278	0.942834841	0.074768169	2.39767419	0.070024697	0.24367608	0.220714958	0.967410387	0.717045981	0.19811638	1.79368371	0.449741913	0.292067591	0.104458554	0.28267955	0.091997136	0.36349875	0.828971765	0.388364633	0.238722187	0.318347978	0.452725315
S12000024	2015	0.623975018	0.665703416	0.644523234	0.459847841	0.225877115	0.169560516	0.616233364	1.370317927	0.333362365	0.43406579	0.206108936	0.418323674	0.420262938	0.834126364	0.876427134	0.268589029	0.881720067	0.564686011	0.14076411	0.985419539	1.053509865	0.698444443	1.138171459	0.392634341	0.547716298	0.405482212	0.148755263	0.942307837	0.076569384	2.395436975	0.067711285	0.249807807	0.22445638	0.984177337	0.72146512	0.201521148	1.775443306	0.45458545	0.296769983	0.113012263	0.285216412	0.094562281	0.372803648	0.82558851	0.390492412	0.241380511	0.328766711	0.452852617
S12000026	2015	0.628818925	0.66992069	0.639921383	0.459817021	0.225627044	0.171860169	0.612015328	1.410335241	0.331796321	0.436613046	0.20728278	0.424245756	0.416202713	0.840332511	0.881181702	0.270025007	0.887480977	0.56710032	0.140984269	0.992113603	1.052133414	0.708266834	1.149589611	0.399494882	0.553469535	0.410574153	0.15072807	0.957840733	0.075692727	2.428103337	0.067389083	0.247863738	0.225701977	0.98379405	0.731217206	0.201118162	1.80200344	0.465398771	0.29882576	0.112099476	0.284413437	0.095122598	0.37142764	0.831713632	0.391110396	0.240549238	0.327877465	0.453563471
S12000027	2015	0.584438414	0.650130725	0.614908069	0.445544058	0.213765862	0.154609924	0.58579597	1.307921968	0.323451971	0.412006802	0.190390606	0.392343027	0.408115772	0.80870333	0.848244812	0.253371523	0.83879602	0.544486306	0.139494379	0.924680206	1.017527376	0.644142804	1.075610436	0.360746044	0.505718015	0.387410289	0.139217032	0.88441986	0.072129489	2.260260845	0.066954601	0.239561832	0.207549202	0.951569206	0.691025816	0.190365327	1.709739767	0.418589042	0.275176818	0.11800186	0.264801189	0.084591318	0.340677714	0.775381224	0.379925242	0.225546883	0.311036895	0.44624784
S12000028	2015	0.631438765	0.664071867	0.641983852	0.465501148	0.22602414	0.171250103	0.612698177	1.381389197	0.334425141	0.438619936	0.208355515	0.423643573	0.41997097	0.839962711	0.878595104	0.26983879	0.885370426	0.563503319	0.139853441	0.993589767	1.054744498	0.707523484	1.144979779	0.398170197	0.558387537	0.404400609	0.151957078	0.961420945	0.076044397	2.425615086	0.066732672	0.248211368	0.227165738	0.980036377	0.727580827	0.200714342	1.808516939	0.461571852	0.299253067	0.109323921	0.286606447	0.096340227	0.379064013	0.817089274	0.392722862	0.241725527	0.32891945	0.453202005
S12000029	2015	0.600413014	0.654807873	0.634222492	0.453418903	0.21658417	0.160494389	0.596677161	1.340972194	0.331201308	0.422717057	0.198283714	0.39480098	0.413252166	0.837184862	0.860408711	0.260558052	0.861289233	0.558615312	0.1402687	0.959041688	1.043253586	0.670251237	1.109966875	0.375322238	0.529414911	0.396148745	0.14460134	0.911940403	0.076493268	2.327843906	0.066926081	0.244103208	0.214318698	0.969460942	0.717323943	0.195357876	1.706000884	0.430902456	0.288141556	0.113377206	0.272383056	0.091347489	0.354514149	0.781059893	0.39398913	0.231031624	0.31555858	0.452856051
S12000030	2015	0.599531334	0.639338574	0.631612358	0.451871515	0.216122053	0.161367142	0.594420381	1.33425185	0.333745967	0.422703443	0.198919823	0.397230526	0.405223464	0.840154102	0.848935348	0.265194561	0.857289569	0.551342827	0.140647709	0.961463193	1.028300483	0.67785754	1.107893748	0.375900595	0.528149904	0.396534115	0.145190488	0.908982021	0.077937665	2.323791763	0.066154929	0.241666676	0.216021783	0.963788412	0.715624536	0.194871273	1.693773792	0.431522992	0.287447781	0.10764161	0.276263626	0.092969992	0.356215018	0.792042506	0.385983931	0.231263272	0.312901975	0.452610509
S12000033	2015	0.566747728	0.62362401	0.628346063	0.445788881	0.211360805	0.149902381	0.578328191	1.339427777	0.311347998	0.39591821	0.183870108	0.37319352	0.40943535	0.814527074	0.810994481	0.243542609	0.808853691	0.53423135	0.141417453	0.895613147	0.993560195	0.617591863	1.03799732	0.343114223	0.498161223	0.370207661	0.14064716	0.836701318	0.077502184	2.17251396	0.061875942	0.233887292	0.201983329	0.923961774	0.667948373	0.190221707	1.58647069	0.388639602	0.275294658	0.115005279	0.252974832	0.084804901	0.3422233	0.770736849	0.377320407	0.221582542	0.301870644	0.441053719
S12000034	2015	0.601272338	0.657042147	0.628294361	0.462515402	0.216483726	0.159271526	0.596839545	1.29738237	0.330450491	0.424826332	0.193025742	0.399872773	0.412859063	0.835439119	0.861017802	0.260136506	0.86234295	0.55228465	0.139750509	0.952790875	1.044285159	0.665504794	1.100683393	0.371011465	0.524364849	0.402900961	0.143778721	0.915579837	0.073800034	2.319112059	0.069570222	0.243854152	0.211175608	0.970037683	0.711376196	0.194235109	1.78606012	0.429119088	0.282634665	0.120437472	0.272523951	0.08876121	0.348758398	0.795039926	0.388634126	0.229183357	0.314482346	0.459364514
S12000035	2015	0.636878851	0.679315889	0.652347787	0.463491442	0.232707793	0.17488888	0.62712055	1.396259411	0.333965035	0.440154565	0.211633876	0.427775583	0.425521423	0.841337352	0.888406186	0.274230473	0.897911609	0.575137798	0.142463124	0.999766526	1.052197629	0.717632088	1.167328115	0.405962233	0.55887993	0.410072898	0.152502011	0.975964863	0.076445643	2.461513395	0.066522668	0.250931666	0.230149211	1.003946701	0.727741679	0.20437852	1.865837732	0.475093809	0.305655513	0.103168137	0.288840194	0.096425403	0.38554982	0.848767087	0.393247968	0.247706264	0.339259345	0.454949773
S12000036	2015	0.59372838	0.654617774	0.654012527	0.446547269	0.223746724	0.161876966	0.618090434	1.297723857	0.334606336	0.422175665	0.200375608	0.389148202	0.423343504	0.840796215	0.854523235	0.261091131	0.850082657	0.558758053	0.144772994	0.96282157	1.045613362	0.668187478	1.107430012	0.372486607	0.525004938	0.386623137	0.15016524	0.903952916	0.082716147	2.29422872	0.067975626	0.248578906	0.216262199	0.975338211	0.710008423	0.202199348	1.707284036	0.416338255	0.296857056	0.103829573	0.273426488	0.094551225	0.378559921	0.787484016	0.387716983	0.239646956	0.3238497	0.456658768
S12000038	2015	0.595760289	0.650233321	0.627781777	0.450651368	0.2119762	0.158589922	0.586308599	1.380290199	0.331221933	0.420046764	0.197751362	0.394058081	0.406296331	0.844862565	0.85947049	0.258274281	0.855815903	0.554462523	0.140270724	0.957799354	1.036168572	0.672150193	1.110207157	0.373936689	0.532595659	0.395078286	0.144055907	0.907666861	0.076042883	2.345389353	0.066183438	0.240936307	0.212418158	0.959250303	0.718737471	0.193380705	1.689710376	0.430326035	0.285074195	0.109948519	0.269673319	0.090914508	0.34971628	0.78711653	0.395201436	0.227829014	0.308766641	0.449629353
S12000039	2015	0.586687825	0.635387848	0.609334333	0.441172473	0.203898787	0.157439596	0.570692483	1.463861903	0.330826688	0.419101758	0.201294636	0.397567826	0.389971918	0.863637288	0.862458633	0.255683204	0.852863243	0.552743697	0.137091721	0.96323064	1.031811914	0.671824666	1.110029235	0.377635629	0.531776327	0.396108918	0.141946416	0.907467671	0.074179528	2.372087556	0.065462109	0.236501704	0.208954545	0.943764251	0.732835697	0.18968802	1.626563109	0.435559938	0.281827127	0.121672982	0.268991143	0.091428371	0.337996794	0.779970107	0.394484983	0.222137797	0.298496944	0.43910867
S12000040	2015	0.574242016	0.630841008	0.604533995	0.440554085	0.200685777	0.150831172	0.561888062	1.389759999	0.328228681	0.410015439	0.19225263	0.379509664	0.388503359	0.851453632	0.857534516	0.254026877	0.844077934	0.549490919	0.13761008	0.934527156	1.026588489	0.649788065	1.087061015	0.361667445	0.502754791	0.398532728	0.13628649	0.8858825	0.072460232	2.289547594	0.066390913	0.236305897	0.201573256	0.942588903	0.721268939	0.186342162	1.59210949	0.418295397	0.274494849	0.132149407	0.259994124	0.087622951	0.318432947	0.756361451	0.39410473	0.215004555	0.293201552	0.444458334
S12000041	2015	0.609391139	0.648749977	0.624861833	0.455053662	0.217355458	0.165783889	0.595406785	1.417034258	0.331370557	0.428477006	0.203743764	0.415798573	0.404238762	0.84396132	0.869759027	0.266181999	0.868751847	0.553616623	0.138855292	0.974095479	1.036863295	0.692041044	1.127964015	0.388953146	0.538750022	0.40471622	0.14564083	0.936967095	0.075064862	2.382038985	0.066788088	0.242601642	0.218595313	0.967385196	0.723786501	0.196349029	1.73457641	0.451465466	0.290266098	0.119457123	0.279617436	0.094362026	0.357612962	0.815423753	0.388788861	0.233040437	0.316554965	0.447084556
S12000042	2015	0.585398749	0.632465989	0.620879582	0.438454294	0.215144165	0.160309702	0.589189422	1.413291909	0.332523323	0.420652981	0.202129645	0.399297869	0.393769895	0.854391659	0.855658461	0.262422535	0.849890257	0.547777752	0.138920867	0.965714463	1.026007227	0.677744889	1.112174074	0.379892316	0.526092553	0.391592702	0.143323192	0.904989769	0.080169998	2.323372134	0.066083422	0.239707985	0.214992007	0.955997654	0.724300773	0.193862213	1.620731925	0.429758535	0.290107131	0.118208022	0.272358918	0.095318158	0.356806654	0.781243452	0.386399859	0.230015583	0.309276234	0.440409231
S12000044	2015	0.576715771	0.631969663	0.60987181	0.439378637	0.20440604	0.153374177	0.570119504	1.372658212	0.329037769	0.41323455	0.194688049	0.382319093	0.392540438	0.844615882	0.849216771	0.25389813	0.841189561	0.545969693	0.137817839	0.939925568	1.023461166	0.653498184	1.08818885	0.3649479	0.512074993	0.391002241	0.138215285	0.88013604	0.074549828	2.289496365	0.066856819	0.237138741	0.204247094	0.938268245	0.7157082	0.188351467	1.598378745	0.418240162	0.278204928	0.120125813	0.264221982	0.089369912	0.33213894	0.753234777	0.392100553	0.218701065	0.299377426	0.442932717
S12000045	2015	0.616561469	0.653616541	0.64402804	0.463106626	0.226950778	0.165209791	0.608754967	1.302693402	0.332662075	0.433507511	0.199316355	0.399253414	0.417148235	0.826806686	0.865128763	0.270640813	0.866211781	0.555342359	0.142337578	0.975951347	1.043163856	0.680668321	1.121653416	0.38192972	0.536374374	0.396761991	0.146870878	0.930917176	0.078397415	2.333160297	0.067562716	0.246839296	0.218543686	0.974925479	0.717500407	0.198900959	1.708489529	0.434384365	0.291791336	0.115490074	0.275702888	0.093260785	0.374925516	0.775675955	0.385899053	0.23796817	0.323288963	0.458916686
S12000046	2015	0.53646496	0.597720845	0.59578433	0.41206354	0.207301268	0.143857236	0.558707129	1.365773403	0.308219505	0.38468935	0.182046643	0.35238783	0.382927719	0.811711745	0.782654997	0.236672181	0.769193262	0.51398345	0.141209507	0.883500416	0.959371401	0.599830709	1.01671655	0.334553989	0.483076773	0.34997138	0.131926232	0.791306373	0.08188194	2.085311869	0.060750619	0.22643248	0.193529629	0.885685079	0.658595129	0.187047658	1.412875407	0.368497515	0.271298437	0.107305276	0.239461908	0.087132045	0.336051789	0.722687797	0.364075204	0.214848681	0.286336009	0.420744245
W06000001	2015	0.60765996	0.64741767	0.623970842	0.459167259	0.222133419	0.168469529	0.598476737	1.401952785	0.325840563	0.427760046	0.205448085	0.412974362	0.406140017	0.822376851	0.857082446	0.264393845	0.866214736	0.55549752	0.137115357	0.968511272	1.023918262	0.68933882	1.127219759	0.390420721	0.535020194	0.398546552	0.145787991	0.931917224	0.074928469	2.365323837	0.066492945	0.242367959	0.221694227	0.96662415	0.707885192	0.197961402	1.792625184	0.456614467	0.295273227	0.117612524	0.283082266	0.094849449	0.365662836	0.823827002	0.382456242	0.236458339	0.325823008	0.440571394
W06000002	2015	0.584715045	0.623546998	0.598972451	0.438698666	0.214645462	0.161113151	0.578793897	1.42691699	0.319270934	0.413718656	0.196032423	0.402092396	0.385845811	0.808992128	0.822410822	0.255821188	0.821688683	0.530940235	0.138008587	0.936597408	0.98515881	0.663717777	1.086614429	0.373640976	0.519576612	0.379291742	0.13669619	0.884663124	0.076009583	2.265308176	0.065177656	0.233933225	0.212454452	0.920645845	0.686274116	0.192364599	1.644704339	0.430865791	0.284222259	0.11215907	0.267971186	0.092058345	0.359478238	0.806519483	0.368548122	0.229296267	0.305787023	0.429515615
W06000003	2015	0.622090591	0.649816611	0.625794564	0.459594863	0.224559983	0.171739354	0.604227882	1.404442901	0.329800983	0.435273069	0.208663579	0.423229854	0.404627363	0.828845385	0.862826706	0.268142343	0.866514559	0.549752484	0.137846577	0.989731272	1.032986302	0.707231123	1.138123744	0.39844255	0.555635866	0.398194138	0.148522899	0.948576306	0.076031654	2.404716271	0.065456297	0.242693156	0.22505642	0.958896969	0.713979275	0.20130473	1.789381951	0.463671061	0.296889665	0.11038621	0.287148742	0.097271225	0.37881519	0.841419471	0.380116221	0.241670833	0.323609309	0.445119829
W06000004	2015	0.599827628	0.63341379	0.602957843	0.447917031	0.216190171	0.163916766	0.583513449	1.439054682	0.326440506	0.423212913	0.203964428	0.413167252	0.39069199	0.830630403	0.852567909	0.263695682	0.85187207	0.540611764	0.135229838	0.960716445	1.016585891	0.683815235	1.116642049	0.38508378	0.530933986	0.393134767	0.139854701	0.920215926	0.074383002	2.356388343	0.066263327	0.239097544	0.217560695	0.947046672	0.717098851	0.194551256	1.685198296	0.452091468	0.288158782	0.124313157	0.275956068	0.094540463	0.357088986	0.805312567	0.381419422	0.22971934	0.311193343	0.436348763
W06000005	2015	0.589686223	0.637419857	0.608726414	0.444697689	0.211695412	0.15901915	0.579366351	1.376987567	0.327051139	0.418068517	0.19724678	0.397298157	0.395236656	0.830142528	0.851991415	0.258960319	0.843680428	0.541443822	0.137534946	0.94799348	1.021681496	0.663906036	1.096213932	0.372670766	0.516839566	0.394503572	0.139143896	0.900031736	0.073142778	2.295601573	0.067602182	0.238446163	0.209034032	0.937729354	0.707488862	0.190788668	1.6759009	0.431267965	0.281154502	0.12008409	0.268643386	0.090083761	0.344305789	0.792190705	0.381615836	0.225729573	0.306324773	0.439569469
W06000006	2015	0.57733451	0.623482176	0.600826902	0.443333463	0.208430112	0.154355557	0.567780616	1.381327005	0.322417629	0.410400052	0.193057862	0.387423805	0.388011348	0.828751551	0.839815775	0.253863304	0.830209507	0.534125644	0.136742813	0.930213911	1.009742638	0.650373368	1.07789042	0.364157402	0.506316697	0.385379969	0.136107295	0.879629889	0.072911861	2.261781594	0.066757842	0.234870622	0.205716351	0.931834959	0.698506119	0.189077734	1.629760791	0.420282211	0.276471367	0.132855681	0.263943288	0.08869731	0.334778229	0.777069164	0.380922091	0.221417467	0.300489391	0.43677741
W06000008	2015	0.595389755	0.629348434	0.602465458	0.440405782	0.216500698	0.163167769	0.581445601	1.42354404	0.319563343	0.417998038	0.197352044	0.406342384	0.384105677	0.812999398	0.823225889	0.256734963	0.827658866	0.532721976	0.139628046	0.941496027	0.980659873	0.67193037	1.093760723	0.37813264	0.521442844	0.386841203	0.139716278	0.892662076	0.076807338	2.286362129	0.063740715	0.233080561	0.213541832	0.920694209	0.685171691	0.191379699	1.689711885	0.43996307	0.286350834	0.100667611	0.271434397	0.093330196	0.361585577	0.823840064	0.366594506	0.229519463	0.309332941	0.430473241
W06000009	2015	0.606591894	0.643781749	0.61369076	0.454995335	0.21792521	0.168176746	0.591944317	1.432441747	0.328574192	0.430661899	0.20543981	0.421950528	0.395382716	0.83444957	0.8597177	0.264352857	0.86127733	0.54639992	0.136998863	0.977583358	1.02411641	0.697043846	1.126739917	0.393707499	0.541472211	0.400816572	0.142979354	0.936100638	0.075126987	2.375827015	0.067561759	0.238852379	0.219922851	0.954280547	0.716508854	0.195701311	1.760064319	0.456440562	0.289728465	0.117663226	0.283721189	0.095640919	0.363874489	0.824306043	0.381115652	0.234501685	0.315136998	0.440153552
W06000010	2015	0.60047069	0.639074035	0.619059543	0.452024888	0.218340158	0.165231779	0.592043002	1.401647685	0.325790221	0.42356464	0.200580654	0.411101904	0.396859512	0.829021669	0.846716681	0.263624447	0.850838896	0.544936275	0.138733789	0.959063947	1.01601969	0.685357826	1.113127861	0.383956623	0.531573324	0.394686234	0.1434748	0.914219414	0.076776944	2.334292825	0.066316214	0.2395184	0.217421101	0.950238879	0.706971206	0.195334149	1.720833761	0.443559012	0.290030396	0.118942183	0.277608155	0.094640233	0.362226054	0.817237388	0.37855952	0.233138491	0.314858642	0.440149278
W06000011	2015	0.567814727	0.605666035	0.601672795	0.430133681	0.210469439	0.154320354	0.570658421	1.385516162	0.318037103	0.403951121	0.190823877	0.383275995	0.382597213	0.820516494	0.81295214	0.251819618	0.804748975	0.521197024	0.136418158	0.92168751	0.983790172	0.642246355	1.059164426	0.35934091	0.503610846	0.371492458	0.136776053	0.854004363	0.078374982	2.193725779	0.063537012	0.231051278	0.205095093	0.911761737	0.680759872	0.189144546	1.568618351	0.406581551	0.279027484	0.116148321	0.258710095	0.090995844	0.348905236	0.779070105	0.367869086	0.22300917	0.298608948	0.427593393
W06000012	2015	0.592018156	0.631025439	0.610877937	0.45092547	0.206590191	0.160903694	0.573671406	1.482966793	0.332329082	0.422049066	0.202804055	0.40771061	0.38961378	0.861093076	0.862790597	0.260163841	0.858859244	0.547826322	0.137203281	0.964276	1.025614798	0.684792247	1.116443178	0.383692463	0.532772418	0.397963583	0.143580604	0.919021613	0.074342878	2.377878563	0.065575774	0.236317791	0.213844924	0.940468505	0.729865396	0.191284522	1.694654789	0.444485636	0.28628531	0.125768871	0.275796736	0.094514485	0.342646859	0.809752379	0.390598681	0.224258985	0.303496582	0.441517885
W06000013	2015	0.590094166	0.636991315	0.611122608	0.450846027	0.207270478	0.160228152	0.576571982	1.436167402	0.331539831	0.422423471	0.200972984	0.403939668	0.392403726	0.852130012	0.861235584	0.259105982	0.857502423	0.550099465	0.13670267	0.963409022	1.033732052	0.679697268	1.113810709	0.380683146	0.526362874	0.399760818	0.140307451	0.913617036	0.073285023	2.354184905	0.06841173	0.238530504	0.212854672	0.94673532	0.724511824	0.191687566	1.684065252	0.439976004	0.283888584	0.119575377	0.276053903	0.092694037	0.340403462	0.801825764	0.39255148	0.224974566	0.302516588	0.445056582
W06000014	2015	0.601807056	0.649565431	0.62383297	0.457888534	0.216306158	0.162121491	0.5927279	1.338185334	0.330417338	0.426688483	0.1981235	0.401333182	0.404662118	0.83466838	0.856651986	0.262116587	0.857261563	0.549966436	0.139274352	0.962747735	1.038313133	0.676638167	1.11151133	0.378971232	0.529578805	0.397872296	0.143185091	0.911446292	0.075863889	2.33150001	0.068136182	0.24227761	0.213221793	0.956830773	0.712671522	0.194872587	1.744749456	0.436013592	0.287066391	0.115714173	0.275314232	0.092603581	0.354487774	0.799790022	0.388028462	0.231275447	0.315010054	0.452275712
W06000015	2015	0.522551727	0.571385512	0.578917603	0.407583083	0.208578018	0.1391412	0.549152844	1.235547439	0.301605433	0.37437892	0.172310535	0.336363008	0.371295901	0.783153567	0.753712259	0.234992035	0.737235732	0.488284432	0.135973089	0.850266465	0.934314951	0.574371568	0.975227362	0.318580708	0.455324442	0.338581752	0.127444924	0.760836067	0.079925889	1.954467412	0.061009619	0.221391127	0.185657687	0.86726296	0.630527249	0.181949948	1.388849171	0.351399928	0.261009047	0.120542685	0.230320893	0.083776772	0.335658743	0.704426573	0.347214676	0.212028986	0.283816073	0.414419652
W06000016	2015	0.576009949	0.624537539	0.597312126	0.44370065	0.20374261	0.155119551	0.561787446	1.422261392	0.324433793	0.412848663	0.195267685	0.387543778	0.382650425	0.842611173	0.845525762	0.252525471	0.837978085	0.538908871	0.136372005	0.938925706	1.010629375	0.657845765	1.090200029	0.369697922	0.510419134	0.389216408	0.135758698	0.889164733	0.072236656	2.296069561	0.066871029	0.232692264	0.205920815	0.934693733	0.708964835	0.187710357	1.633521394	0.42818515	0.277776213	0.125229407	0.265883869	0.090409834	0.328396059	0.78178692	0.386303145	0.218521337	0.295726228	0.436089605
W06000018	2015	0.577502961	0.626355219	0.600873594	0.445462479	0.203422537	0.156224049	0.563741781	1.426068757	0.329210953	0.414994994	0.196363777	0.391861255	0.38405763	0.851287418	0.852004719	0.255485081	0.844914351	0.543319703	0.137189083	0.941896277	1.017421251	0.662175744	1.094873036	0.371712283	0.511216061	0.394258077	0.136540087	0.894792472	0.073865982	2.308529683	0.067502914	0.235010124	0.206154785	0.933888476	0.718569845	0.187647124	1.640990721	0.429784793	0.279624457	0.129593781	0.269053039	0.091691353	0.330129409	0.771888288	0.390427051	0.218310288	0.297858995	0.440299088
W06000019	2015	0.569771872	0.616020404	0.592426156	0.44281908	0.197960666	0.155176386	0.554920964	1.544435193	0.333898364	0.41294306	0.198707643	0.397295793	0.374425269	0.865389919	0.858511931	0.255236156	0.843557355	0.540933708	0.1356781	0.948447807	1.011416278	0.675257928	1.107926981	0.377299907	0.521680309	0.394423174	0.135255979	0.901085902	0.074859338	2.361475324	0.064306518	0.231094501	0.208381011	0.92927831	0.729415839	0.186683611	1.634035254	0.436238278	0.281059181	0.130997147	0.268670709	0.093338426	0.325651142	0.8047929	0.393232043	0.216836136	0.290098164	0.43268775
W06000020	2015	0.583614847	0.625609516	0.607697169	0.443109785	0.209423089	0.15850611	0.574338983	1.396735044	0.32509567	0.414920111	0.198062994	0.390525028	0.390356148	0.841536881	0.849747002	0.258453896	0.844887965	0.540912991	0.136668515	0.947259742	1.017070014	0.665913478	1.098314204	0.373971875	0.517563141	0.391845299	0.137352475	0.895761118	0.074948349	2.305903937	0.065884435	0.237704836	0.21115995	0.950328551	0.711978307	0.191211786	1.652397968	0.432334567	0.284286299	0.130551811	0.269632468	0.092564465	0.339809307	0.78977771	0.383880457	0.224104821	0.307052728	0.435566725
W06000021	2015	0.638112236	0.685388587	0.654930417	0.476741403	0.232108282	0.173253407	0.628696741	1.30549362	0.334920863	0.445961064	0.204665266	0.433835144	0.429806	0.834372692	0.882851183	0.274986547	0.892398548	0.568350755	0.142987385	0.989202147	1.063228615	0.707759821	1.144173581	0.394973172	0.557079842	0.414627466	0.153538441	0.951346755	0.077183166	2.403875937	0.070231038	0.253890602	0.227974248	0.98804265	0.721629707	0.203175758	1.9291119	0.461085683	0.299397455	0.10862143	0.290432372	0.095686709	0.383878529	0.848472293	0.390863243	0.247237152	0.340345112	0.467318357
W06000022	2015	0.545612295	0.592509786	0.585766962	0.41773557	0.205631097	0.148397751	0.55786698	1.3084399	0.316063904	0.396795496	0.187098102	0.360784954	0.370524004	0.809801915	0.795549321	0.245271742	0.783981251	0.509954429	0.134588289	0.905523442	0.973208669	0.622473081	1.037241735	0.348401572	0.482527701	0.363247325	0.131148804	0.82492057	0.078815066	2.12387004	0.064562693	0.227479728	0.196621503	0.902300529	0.673059261	0.186383299	1.492400523	0.38900661	0.271797944	0.123288136	0.251912924	0.089492641	0.33688168	0.737566939	0.36151091	0.218337715	0.289057498	0.42465856
W06000023	2015	0.624710393	0.681755608	0.635915928	0.463387736	0.228517128	0.174352053	0.617266713	1.392840611	0.328841466	0.439666432	0.206179873	0.431725469	0.414545185	0.823764314	0.867292522	0.269364829	0.884048447	0.564838031	0.141585825	0.987107338	1.036330415	0.709838616	1.148754035	0.401274645	0.549372858	0.408281079	0.147703766	0.947157778	0.077655904	2.398087167	0.068882285	0.245042403	0.227054198	0.984057487	0.714016314	0.201893003	1.863873828	0.469484352	0.299211352	0.104285259	0.289231778	0.095810967	0.375397569	0.852736029	0.38486072	0.243619017	0.330334078	0.4506865
W06000024	2015	0.557738957	0.614381319	0.585795128	0.437754257	0.197861451	0.151325468	0.550813294	1.458583915	0.32471653	0.406466022	0.195188568	0.38592793	0.372693179	0.851301505	0.842829663	0.252136966	0.831925196	0.536377742	0.13460183	0.930025172	0.999457151	0.652483993	1.086682522	0.365797626	0.507531739	0.389354629	0.134191009	0.873167013	0.074963564	2.290574605	0.06461466	0.229153342	0.202581846	0.92555853	0.715319531	0.183985662	1.593795171	0.422936841	0.276449775	0.134996285	0.263117292	0.090684735	0.323908596	0.778135471	0.383861392	0.214509481	0.288923301	0.432259915
[truncated: 58 more columns]
